# Supplementary material for: Signature-scoring methods developed for bulk samples are not adequate for cancer single-cell RNA sequencing data
Source: eLife. 2022 Feb 25;11:e71994. doi: 10.7554/eLife.71994 (PMC8916770; doi:10.7554/eLife.71994)
Supplement: Figure 1—source data 1. [file elife-71994-fig1-data1.xlsx]

## Sheet: Figure 1
Figure 1A					Figure 1B					Figure 1C: Spearman Rho												Figure 1D
SampleID	Number of detected Genes	Phenotypes	Data set		Method	Percentage	Cohen's d	Dataset		Methods	LIHC	Melanoma	HNSC	CRC	Astrocytoma	GBM(Neftal et al)	ccRCC	BRCA	Prostate	GBM(Darmanis et al)		SampleID	JASMINE	ssGSEA	AUCell	SCSE	S.Score	G2M.Score	Seurat Cell CyclePhase	CellType	GeneCounts	MKI67
1	1194	Normal	Prostate		AUCell	5.89648	down	BRCA		JASMINE	-0.0254613	0.0559546	-0.082112	-0.0270042	0.264873	0.23283	0.0166694	0.266488	-0.10366	0.00759252		HN23_P11_A04_S4_comb	0.333526	0.225997	0.124459	12.2166	-0.0613285	-0.137306	G1	Normal	2320	0
10	1630	Normal	Prostate		GSVA	2.81221	down	BRCA		AUCell	-0.124195	-0.106688	-0.21033	-0.139176	0.149191	0.0732871	0.0556399	-0.0311023	-0.155245	0.00813905		HN23_P11_A07_S7_comb	0.274933	0.221819	0.11882	12.0141	-0.100909	-0.075038	G1	Normal	2053	0
100	1809	Normal	Prostate		JASMINE	3.97545	down	BRCA		SCSE	-0.0416261	0.0447016	-0.158352	-0.0483315	0.187644	0.153711	0.0577619	0.0596204	0.134236	0.0405639		HN23_P11_A08_S8_comb	0.347229	0.244321	0.132135	12.9328	-0.0357449	-0.0134679	G1	Normal	2036	0
1000	1418	Normal	Prostate		SCSE	3.26841	down	BRCA		ssGSEA	0.205554	0.261114	0.26143	0.238445	0.369058	0.367202	0.330854	0.178429	0.0331754	0.228939		HN23_P11_A09_S9_comb	0.291031	0.165346	0.116771	11.5037	-0.00626316	-0.0196325	G1	Normal	2012	0
1001	1874	Normal	Prostate		ssGSEA	9.68517	down	BRCA		GSVA	0.242379	0.289706	0.212568	0.286676	0.352444	0.33285	0.379271	0.374744	0.0237706	0.189412		HN23_P11_B05_S17_comb	0.308408	0.181397	0.124159	11.9855	-0.15079	-0.134726	G1	Normal	2050	0
101	1655	Normal	Prostate		AUCell	4.34479	down	ccRCC														HN23_P11_B06_S18_comb	0.255687	0.239415	0.118759	11.8087	-0.140658	-0.0576965	G1	Normal	2106	0
102	1930	Normal	Prostate		GSVA	1.46608	down	ccRCC		Figure 1C- Spearman Pvalue												HN23_P11_B08_S20_comb	0.250401	0.191071	0.114698	11.4001	-0.0797467	-0.0184218	G1	Normal	2124	0
1024	1686	Normal	Prostate		JASMINE	3.54848	down	ccRCC		Methods	LIHC	Melanoma	HNSC	CRC	Astrocytoma	GBM(Neftal et al)	ccRCC	BRCA	Prostate	GBM(Darmanis et al)		HN23_P11_B11_S23_comb	0.266477	0.212686	0.116079	11.5208	-0.0902902	-0.00791847	G1	Normal	2451	0
1025	1074	Normal	Prostate		SCSE	6.98519	down	ccRCC		JASMINE	>0.05	<0.01	<0.01	>0.05	<0.01	<0.01	>0.05	<0.01	<0.01	>0.05		HN23_P11_C01_S25_comb	0.253964	0.172352	0.103862	10.6069	-0.0180641	-0.0575109	G1	Normal	2117	0
1026	2047	Normal	Prostate		ssGSEA	1.45292	down	ccRCC		AUCell	<0.01	<0.01	<0.01	<0.01	<0.01	<0.01	<0.01	<0.01	<0.01	>0.05		HN23_P11_C03_S27_comb	0.296255	0.19121	0.11914	11.7362	-0.0876072	-0.0579249	G1	Normal	2160	0
1027	1520	Normal	Prostate		AUCell	13.8032	down	CRC		SCSE	<0.01	<0.01	<0.01	<0.01	<0.01	<0.01	<0.01	<0.01	<0.01	<0.01		HN23_P11_C04_S28_comb	0.368125	0.221307	0.139092	13.5031	-0.0208718	-0.0810896	G1	Normal	2218	0
1028	2195	Normal	Prostate		GSVA	2.59896	down	CRC		ssGSEA	<0.01	<0.01	<0.01	<0.01	<0.01	<0.01	<0.01	<0.01	<0.01	<0.01		HN23_P11_C07_S31_comb	0.273342	0.210898	0.11374	11.1586	-0.125588	-0.0194319	G1	Normal	2602	0
1029	1726	Normal	Prostate		JASMINE	8.46349	down	CRC		GSVA	<0.01	<0.01	<0.01	<0.01	<0.01	<0.01	<0.01	<0.01	<0.01	<0.01		HN23_P11_C09_S33_comb	0.236504	0.217421	0.119281	11.6262	-0.0851296	-0.0435778	G1	Normal	2263	0
103	2328	Normal	Prostate		SCSE	12.1746	down	CRC														HN23_P11_D03_S39_comb	0.343266	0.166629	0.120825	11.8124	-0.0269409	-0.0633121	G1	Normal	2248	0
1030	1771	Normal	Prostate		ssGSEA	2.60312	down	CRC														HN23_P11_D07_S43_comb	0.332642	0.204105	0.123	11.995	-0.092957	-0.0615124	G1	Normal	2401	0
1031	2362	Normal	Prostate		AUCell	4.80577	down	GBM(Darmanis et al)														HN23_P11_D10_S46_comb	0.372587	0.227361	0.121832	12.3633	-0.127005	-0.00678699	G1	Normal	2604	0
1032	1717	Normal	Prostate		GSVA	4.37158	down	GBM(Darmanis et al)														HN23_P11_D11_S47_comb	0.294196	0.180647	0.117546	11.5673	-0.00495793	-0.0642874	G1	Normal	2062	0
1033	1799	Normal	Prostate		JASMINE	3.67107	down	GBM(Darmanis et al)														HN23_P11_E01_S49_comb	0.293107	0.17557	0.122668	11.908	-0.0853028	-0.000579422	G1	Normal	2120	0
1034	2209	Normal	Prostate		SCSE	4.33854	down	GBM(Darmanis et al)														HN23_P11_E03_S51_comb	0.288052	0.168204	0.114219	11.246	-0.148585	-0.0553247	G1	Normal	2182	0
1035	1995	Normal	Prostate		ssGSEA	4.32519	down	GBM(Darmanis et al)														HN23_P11_E04_S52_comb	0.338404	0.293574	0.125418	12.9888	-0.0776503	-0.07414	G1	Normal	2781	0
1036	1736	Normal	Prostate		AUCell	22.1509	down	HNSC														HN23_P11_E08_S56_comb	0.320872	0.213929	0.126462	12.2247	-0.165344	-0.173593	G1	Normal	2214	0
1037	1920	Normal	Prostate		GSVA	4.89138	down	HNSC														HN23_P11_E10_S58_comb	0.173775	0.19411	0.105278	10.6152	-0.0467532	-0.108548	G1	Normal	2139	0
1038	1592	Normal	Prostate		JASMINE	9.14184	down	HNSC														HN23_P11_E11_S59_comb	0.311088	0.212072	0.12702	12.7578	-0.123523	-0.118392	G1	Normal	2005	0
1039	1891	Normal	Prostate		SCSE	19.5135	down	HNSC														HN23_P11_E12_S60_comb	0.349933	0.177182	0.125474	12.4119	-0.0539862	-0.0334992	G1	Normal	2025	0
104	2186	Normal	Prostate		ssGSEA	3.36157	down	HNSC														HN23_P11_F03_S63_comb	0.321399	0.242183	0.122396	12.3411	-0.0254757	-0.00555458	G1	Normal	2544	0
1040	1677	Normal	Prostate		AUCell	24.6776	down	Astrocytoma														HN23_P11_G05_S77_comb	0.382577	0.191703	0.130831	12.7509	-0.128676	-0.0809719	G1	Normal	2127	0
1041	1484	Normal	Prostate		GSVA	16.5534	down	Astrocytoma														HN23_P11_G06_S78_comb	0.32557	0.228745	0.128941	12.7827	-0.115077	-0.0747945	G1	Normal	2271	0
1042	1927	Normal	Prostate		JASMINE	24.0328	down	Astrocytoma														HN23_P11_G07_S79_comb	0.30032	0.182629	0.119376	11.8301	-0.0148679	-0.11792	G1	Normal	2060	0
1043	1462	Normal	Prostate		SCSE	31.1401	down	Astrocytoma														HN23_P11_G08_S80_comb	0.377356	0.244757	0.132455	12.7847	-0.151279	-0.0585705	G1	Normal	2533	0
1044	1701	Normal	Prostate		ssGSEA	17.541	down	Astrocytoma														HN23_P11_G09_S81_comb	0.249317	0.192094	0.112697	11.0024	-0.109005	-0.0684845	G1	Normal	2015	0
1045	2026	Normal	Prostate		AUCell	12.6685	down	GBM(Neftal et al)														HN23_P11_G12_S84_comb	0.247036	0.212915	0.116257	11.1921	-0.0321693	-0.132357	G1	Normal	2876	0
1046	2248	Normal	Prostate		GSVA	7.95942	down	GBM(Neftal et al)														HN23_P11_H03_S87_comb	0.150262	0.190766	0.105616	10.4583	-0.0745337	-0.135357	G1	Normal	2361	0
1047	1901	Normal	Prostate		JASMINE	11.6273	down	GBM(Neftal et al)														HN23_P11_H10_S94_comb	0.203206	0.198981	0.109102	11.0792	-0.109541	-0.121177	G1	Normal	2307	0
1048	1489	Normal	Prostate		SCSE	17.0738	down	GBM(Neftal et al)														HN23_P11_H11_S95_comb	0.357435	0.178923	0.129865	12.7425	-0.0198473	-0.0568143	G1	Normal	2053	0
1049	2064	Normal	Prostate		ssGSEA	7.72928	down	GBM(Neftal et al)														HN23_P11_H12_S96_comb	0.292462	0.23819	0.108958	11.5109	-0.0340915	-0.0482438	G1	Normal	3108	0
105	1847	Normal	Prostate		AUCell	3.35113	down	LIHC														HN25_P13P30_A03_S195_comb	0.377283	0.228946	0.130829	12.8361	-0.0309325	-0.021779	G1	Normal	2557	0
1050	2016	Normal	Prostate		GSVA	1.93256	down	LIHC														HN25_P13P30_A05_S197_comb	0.394417	0.261546	0.142459	13.78	-0.107796	-0.0770649	G1	Normal	2394	0
1051	1562	Normal	Prostate		JASMINE	3.83178	down	LIHC														HN25_P13P30_A09_S201_comb	0.331442	0.282714	0.128445	13.0466	-0.103743	-0.0156021	G1	Normal	2655	0
1052	1716	Normal	Prostate		SCSE	2.06943	down	LIHC														HN25_P13P30_B03_S207_comb	0.331038	0.23931	0.127763	12.5455	-0.153872	-0.158793	G1	Normal	2191	0
1053	1505	Normal	Prostate		ssGSEA	1.64219	down	LIHC														HN25_P13P30_B05_S209_comb	0.345992	0.285177	0.139236	13.5876	-0.0809165	-0.020072	G1	Normal	2217	0
1054	1388	Normal	Prostate		AUCell	14.177	down	Melanoma														HN25_P13P30_B08_S212_comb	0.467577	0.272185	0.153699	14.9329	-0.130376	-0.00110644	G1	Normal	2430	0
1055	2564	Normal	Prostate		GSVA	5.18459	down	Melanoma														HN25_P13P30_B09_S213_comb	0.362696	0.216575	0.132556	12.9228	-0.158036	-0.0760682	G1	Normal	2125	0
1056	2319	Normal	Prostate		JASMINE	6.50113	down	Melanoma														HN25_P13P30_C03_S219_comb	0.30662	0.211678	0.127589	12.609	-0.0995672	-0.0953338	G1	Normal	2251	0
1057	2974	Normal	Prostate		SCSE	9.75838	down	Melanoma														HN25_P13P30_C04_S220_comb	0.453007	0.246389	0.152959	14.6915	-0.111358	-0.0734942	G1	Normal	2281	0
1058	2556	Normal	Prostate		ssGSEA	4.1383	down	Melanoma														HN25_P13P30_C05_S221_comb	0.35944	0.264549	0.133499	13.2839	-0.0903138	-0.0592252	G1	Normal	2455	0
1059	1499	Normal	Prostate		AUCell	11.9648	down	Prostate														HN25_P13P30_C06_S222_comb	0.365941	0.243542	0.136466	13.1023	-0.128017	-0.0430349	G1	Normal	2654	0
106	816	Normal	Prostate		GSVA	4.45155	down	Prostate														HN25_P13P30_C11_S227_comb	0.324669	0.230783	0.128137	12.6831	-0.066166	-0.00173218	G1	Normal	2250	0
1060	1781	Normal	Prostate		JASMINE	6.54929	down	Prostate														HN25_P13P30_D10_S238_comb	0.374391	0.248755	0.136436	13.2041	-0.0122634	-0.0242632	G1	Normal	2436	0
1061	3106	Normal	Prostate		SCSE	3.05456	down	Prostate														HN25_P13P30_E01_S241_comb	0.360968	0.26072	0.138516	13.3187	-0.00936929	-0.0171906	G1	Normal	2668	0
1062	1553	Normal	Prostate		ssGSEA	4.50847	down	Prostate														HN25_P13P30_F01_S253_comb	0.299608	0.242131	0.123388	12.338	-0.13211	-0.0803504	G1	Normal	2266	0
1063	1812	Normal	Prostate		AUCell	3.80203	up	BRCA														HN25_P13P30_F07_S259_comb	0.398906	0.210475	0.140984	13.7545	-0.127585	-0.0841026	G1	Normal	2102	0
1064	2889	Normal	Prostate		GSVA	21.8846	up	BRCA														HN25_P23_A02_S194_comb	0.365702	0.365853	0.122998	12.9039	-0.150662	-0.101014	G1	Normal	3588	0
1065	1923	Normal	Prostate		JASMINE	8.79136	up	BRCA														HN25_P23_A08_S200_comb	0.307868	0.409607	0.123119	11.881	-0.027229	-0.0619755	G1	Normal	4621	0
1066	1455	Normal	Prostate		SCSE	1.7476	up	BRCA														HN25_P23_A12_S204_comb	0.31789	0.273591	0.120522	11.4507	-0.0655709	-0.157368	G1	Normal	4092	0
1067	1945	Normal	Prostate		ssGSEA	5.14941	up	BRCA														HN25_P23_B02_S206_comb	0.33492	0.305972	0.122237	13.36	-0.11911	-0.104041	G1	Normal	2569	0
1068	1518	Normal	Prostate		AUCell	13.9564	up	ccRCC														HN25_P23_B03_S207_comb	0.366095	0.322424	0.125971	12.6374	-0.148052	-0.178932	G1	Normal	3569	0
1069	1610	Normal	Prostate		GSVA	35.1726	up	ccRCC														HN25_P23_B06_S210_comb	0.350127	0.291482	0.130199	13.2	-0.147571	-0.0188897	G1	Normal	2798	0
107	2054	Normal	Prostate		JASMINE	11.777	up	ccRCC														HN25_P23_B08_S212_comb	0.37414	0.324564	0.135322	13.1755	-0.0990873	-0.137228	G1	Normal	3253	0
1070	1737	Normal	Prostate		SCSE	7.72562	up	ccRCC														HN25_P23_B11_S215_comb	0.369556	0.212035	0.141569	14.1554	-0.0478944	-0.0663962	G1	Normal	2080	0
1071	1832	Normal	Prostate		ssGSEA	27.829	up	ccRCC														HN25_P23_C01_S217_comb	0.275387	0.293872	0.11228	11.3373	-0.104262	-0.0897425	G1	Normal	3511	0
1072	1568	Normal	Prostate		AUCell	9.49139	up	CRC														HN25_P23_C04_S220_comb	0.275787	0.262841	0.118813	11.5782	-0.135399	-0.116764	G1	Normal	3104	0
1073	800	Normal	Prostate		GSVA	46.5014	up	CRC														HN25_P23_C05_S221_comb	0.301361	0.255212	0.11259	11.7397	-0.153658	-0.13263	G1	Normal	2977	0
1074	2516	Normal	Prostate		JASMINE	11.1601	up	CRC														HN25_P23_C06_S222_comb	0.377747	0.442817	0.138495	13.2063	-0.111407	-0.130543	G1	Normal	4568	0
1075	1643	Normal	Prostate		SCSE	9.91857	up	CRC														HN25_P23_D02_S230_comb	0.329319	0.456196	0.131387	12.1155	-0.173549	-0.0726257	G1	Normal	4854	0
1076	1385	Normal	Prostate		ssGSEA	41.9971	up	CRC														HN25_P23_D03_S231_comb	0.403117	0.345553	0.14493	13.7659	-0.129841	-0.0297434	G1	Normal	3916	0
1077	1858	Normal	Prostate		AUCell	1.81551	up	GBM(Darmanis et al)														HN25_P23_D04_S232_comb	0.377654	0.477585	0.137415	13.0937	-0.165245	-0.0695282	G1	Normal	5084	0
1078	1528	Normal	Prostate		GSVA	2.9055	up	GBM(Darmanis et al)														HN25_P23_D12_S240_comb	0.356414	0.385066	0.138563	12.764	-0.0433883	-0.0684564	G1	Normal	4015	0
1079	2422	Normal	Prostate		JASMINE	1.36163	up	GBM(Darmanis et al)														HN25_P23_E02_S242_comb	0.359788	0.426688	0.13372	12.2796	-0.118411	-0.185253	G1	Normal	4685	0
108	2145	Normal	Prostate		SCSE	1.94901	up	GBM(Darmanis et al)														HN25_P23_E05_S245_comb	0.380947	0.329336	0.136053	13.0302	-0.0817838	-0.0918627	G1	Normal	3698	0
1080	1681	Normal	Prostate		ssGSEA	1.81551	up	GBM(Darmanis et al)														HN25_P23_E09_S249_comb	0.337695	0.292047	0.128134	12.6673	-0.0299913	-0.0720909	G1	Normal	2769	0
1081	1455	Normal	Prostate		AUCell	9.93441	up	HNSC														HN25_P23_E12_S252_comb	0.348946	0.563223	0.13036	11.6907	-0.142773	-0.13483	G1	Cancer	7127	0
1082	1435	Normal	Prostate		GSVA	34.5462	up	HNSC														HN25_P23_F01_S253_comb	0.443421	0.430247	0.150178	14.3538	-0.138045	-0.14957	G1	Normal	4171	0
1083	2111	Normal	Prostate		JASMINE	9.38781	up	HNSC														HN25_P23_F04_S256_comb	0.342985	0.351337	0.130673	12.8705	-0.127669	-0.107857	G1	Normal	3371	0
1084	1959	Normal	Prostate		SCSE	4.96037	up	HNSC														HN25_P23_F07_S259_comb	0.313179	0.201413	0.124515	11.9131	-0.0637846	-0.111062	G1	Normal	2385	0
1085	1677	Normal	Prostate		ssGSEA	50.164	up	HNSC														HN25_P23_F08_S260_comb	0.38013	0.642179	0.136349	12.444	-0.00946345	-0.160819	G1	Cancer	7073	0
1086	1626	Normal	Prostate		AUCell	15.1817	up	Astrocytoma														HN25_P23_G01_S265_comb	0.315483	0.642848	0.127859	12.0285	-0.0794397	-0.0777395	G1	Cancer	6744	1.3074
1087	1469	Normal	Prostate		GSVA	31.3874	up	Astrocytoma														HN25_P23_G05_S269_comb	0.356565	0.250537	0.135121	13.2298	-0.0543746	-0.0474629	G1	Normal	2498	0
1088	1472	Normal	Prostate		JASMINE	24.1061	up	Astrocytoma														HN25_P23_H02_S278_comb	0.279073	0.323567	0.119845	11.4453	-0.0809156	-0.125163	G1	Normal	3726	0
1089	1539	Normal	Prostate		SCSE	18.7134	up	Astrocytoma														HN25_P23_H03_S279_comb	0.357869	0.587236	0.121222	12.128	-0.132456	-0.122271	G1	Normal	6606	0
109	2244	Normal	Prostate		ssGSEA	39.9912	up	Astrocytoma														HN25_P23_H04_S280_comb	0.338403	0.525845	0.126121	11.9146	-0.125089	-0.0967004	G1	Cancer	6190	0
1090	1600	Normal	Prostate		AUCell	7.58243	up	GBM(Neftal et al)														HN25_P23_H08_S284_comb	0.430453	0.304092	0.144979	14.2998	-0.148394	-0.0930633	G1	Normal	3021	0
1091	1719	Normal	Prostate		GSVA	18.0766	up	GBM(Neftal et al)														HN25_P23_H09_S285_comb	0.388107	0.283929	0.144585	13.9369	-0.0890918	-0.0199941	G1	Normal	2150	0
1092	1203	Normal	Prostate		JASMINE	9.43799	up	GBM(Neftal et al)														HN25_P23_H10_S286_comb	0.382676	0.399902	0.135986	13.1376	-0.0935993	-0.0378252	G1	Normal	4010	0
1093	1535	Normal	Prostate		SCSE	7.12855	up	GBM(Neftal et al)														HN25_P24_A01_S97_comb	0.36659	0.44132	0.140351	12.7958	-0.0118573	-0.172699	G1	Normal	4655	0
1094	1970	Normal	Prostate		ssGSEA	26.2048	up	GBM(Neftal et al)														HN25_P24_A02_S98_comb	0.26825	0.5569	0.125318	11.4242	-0.113739	-0.142189	G1	Cancer	6258	0
1095	1530	Normal	Prostate		AUCell	4.753	up	LIHC														HN25_P24_A04_S100_comb	0.367807	0.297148	0.139743	12.9807	-0.112586	-0.115382	G1	Normal	2769	0
1096	1369	Normal	Prostate		GSVA	10.116	up	LIHC														HN25_P24_A05_S101_comb	0.391026	0.300099	0.151266	13.6361	-0.0693358	-0.0363315	G1	Normal	2675	0
1097	1334	Normal	Prostate		JASMINE	4.76636	up	LIHC														HN25_P24_A08_S104_comb	0.37487	0.321399	0.137134	13.1056	-0.115132	-0.090255	G1	Normal	3089	0
1098	1552	Normal	Prostate		SCSE	4.37917	up	LIHC														HN25_P24_A12_S108_comb	0.349468	0.302976	0.129641	12.3274	-0.126707	-0.0698756	G1	Normal	3216	0
1099	2153	Normal	Prostate		ssGSEA	6.79573	up	LIHC														HN25_P24_B01_S109_comb	0.356317	0.672147	0.133933	12.3035	-0.162455	-0.110303	G1	Cancer	7187	0
11	1680	Normal	Prostate		AUCell	14.0168	up	Melanoma														HN25_P24_B04_S112_comb	0.523112	0.895779	0.140495	13.4049	0.560464	0.0743641	S	Cancer	8588	0
110	1675	Normal	Prostate		GSVA	43.9824	up	Melanoma														HN25_P24_B06_S114_comb	0.370835	0.382116	0.142519	13.2817	-0.128283	-0.106396	G1	Normal	3768	0
1100	1309	Normal	Prostate		JASMINE	15.285	up	Melanoma														HN25_P24_B07_S115_comb	0.400911	0.685589	0.148123	12.7647	-0.0611447	-0.102058	G1	Cancer	7211	0
1101	677	Normal	Prostate		SCSE	14.2705	up	Melanoma														HN25_P24_C10_S130_comb	0.396033	0.406428	0.126915	13.2546	-0.122328	-0.155078	G1	Normal	3800	0
1102	667	Normal	Prostate		ssGSEA	48.872	up	Melanoma														HN25_P24_D02_S134_comb	0.27384	0.268472	0.114652	11.7135	-0.0655161	-0.0640577	G1	Normal	2657	0
111	1704	Normal	Prostate		AUCell	4.05496	up	Prostate														HN25_P24_D08_S140_comb	0.348573	0.429609	0.141124	12.9434	-0.105656	-0.134869	G1	Normal	4020	0
112	1756	Normal	Prostate		GSVA	3.46528	up	Prostate														HN25_P24_D09_S141_comb	0.258554	0.230928	0.120899	11.7841	-0.143002	-0.088239	G1	Normal	2266	0
113	1617	Normal	Prostate		JASMINE	3.88155	up	Prostate														HN25_P24_E01_S145_comb	0.422203	0.355802	0.159443	14.6915	-0.124754	-0.078847	G1	Cancer	2761	0
114	1968	Normal	Prostate		SCSE	9.23036	up	Prostate														HN25_P24_E04_S148_comb	0.37593	0.428229	0.137795	13.6648	-0.169036	-0.108615	G1	Normal	3595	0
115	2045	Normal	Prostate		ssGSEA	2.09417	up	Prostate														HN25_P24_E11_S155_comb	0.364651	0.360547	0.139227	13.8546	-0.0547309	-0.0958088	G1	Normal	2947	0
116	2161	Normal	Prostate																			HN25_P24_F02_S158_comb	0.255775	0.299608	0.116922	11.9861	-0.17538	-0.171399	G1	Normal	2729	0
1169	1618	Normal	Prostate																			HN25_P24_F05_S161_comb	0.338183	0.351083	0.140327	13.0398	-0.166722	-0.0850628	G1	Normal	2937	0
117	1966	Normal	Prostate																			HN25_P24_F06_S162_comb	0.312071	0.386017	0.12886	11.9796	-0.168681	-0.0164132	G1	Normal	4507	0
1175	1294	Normal	Prostate																			HN25_P24_F07_S163_comb	0.339233	0.644252	0.120219	12.6826	-0.0310221	-0.0599022	G1	Cancer	5687	0
1176	2801	Normal	Prostate																			HN25_P24_F08_S164_comb	0.288367	0.230052	0.129538	12.578	-0.0793296	-0.0453286	G1	Normal	2194	0
1177	1957	Normal	Prostate																			HN25_P24_G01_S169_comb	0.393746	0.651485	0.139689	12.768	-0.0733772	-0.091622	G1	Cancer	6703	0
1178	2918	Normal	Prostate																			HN25_P24_G05_S173_comb	0.31167	0.580283	0.12829	12.0892	-0.0677323	-0.166875	G1	Cancer	5940	0
1179	3025	Normal	Prostate																			HN25_P24_G07_S175_comb	0.363146	0.686799	0.122324	12.2998	-0.0534273	-0.121267	G1	Cancer	7126	0
118	1599	Normal	Prostate																			HN25_P24_G08_S176_comb	0.511096	0.813207	0.157416	14.6694	0.112551	0.807902	G2M	Cancer	6262	3.6105
1180	2240	Normal	Prostate																			HN25_P24_G10_S178_comb	0.27268	0.273307	0.123911	12.4106	-0.158379	-0.134399	G1	Cancer	2261	0
1181	2595	Normal	Prostate																			HN25_P24_H02_S182_comb	0.263939	0.531299	0.114895	11.1782	-0.23949	-0.167378	G1	Cancer	6412	0
1182	2719	Normal	Prostate																			HN25_P24_H04_S184_comb	0.400925	0.430921	0.155704	13.9463	-0.155898	-0.0717969	G1	Normal	3295	0
1183	2534	Normal	Prostate																			HN25_P24_H12_S192_comb	0.374144	0.434606	0.126936	12.9452	-0.0362201	-0.0381369	G1	Normal	4540	0
1184	3105	Normal	Prostate																			HN25_P25_A03_S291_comb	0.36598	0.320874	0.1429	14.1151	-0.077366	-0.0570139	G1	Normal	2333	0
1185	2754	Normal	Prostate																			HN25_P25_A06_S294_comb	0.331674	0.371152	0.124357	12.4099	-0.104228	-0.123934	G1	Normal	3995	0
1186	3122	Normal	Prostate																			HN25_P25_A07_S295_comb	0.286378	0.258528	0.129643	12.2245	-0.160225	-0.178712	G1	Normal	2696	0
1187	2666	Normal	Prostate																			HN25_P25_A08_S296_comb	0.400954	0.361921	0.137738	13.588	-0.187254	-0.102832	G1	Normal	3474	0
1188	2907	Normal	Prostate																			HN25_P25_A09_S297_comb	0.414239	0.757333	0.14536	12.9168	-0.11068	-0.102971	G1	Cancer	7555	0
1189	2923	Normal	Prostate																			HN25_P25_A10_S298_comb	0.397291	0.456199	0.138149	13.6041	-0.0606646	-0.0371679	G1	Normal	4042	0
119	2234	Normal	Prostate																			HN25_P25_A11_S299_comb	0.367799	0.225644	0.131408	12.7541	-0.0032957	-0.0870962	G1	Normal	2697	0
1190	2197	Normal	Prostate																			HN25_P25_B07_S307_comb	0.404701	0.358187	0.15712	13.9746	-0.109816	-0.130614	G1	Normal	3534	0
1191	2855	Normal	Prostate																			HN25_P25_B08_S308_comb	0.291146	0.168746	0.11316	11.1337	-0.0554182	-0.029881	G1	Normal	2393	0
1192	2850	Normal	Prostate																			HN25_P25_B12_S312_comb	0.34472	0.62636	0.1258	11.9081	-0.0505618	-0.116605	G1	Cancer	7139	0
1193	5089	Normal	Prostate																			HN25_P25_C01_S313_comb	0.325529	0.245541	0.117461	12.0924	-0.111016	-0.120835	G1	Normal	2843	0
1194	2675	Normal	Prostate																			HN25_P25_C02_S314_comb	0.298945	0.238189	0.124552	12.3095	-0.0605333	-0.0610394	G1	Normal	2401	0
1195	2789	Normal	Prostate																			HN25_P25_C03_S315_comb	0.566648	0.921651	0.150832	14.1443	0.608681	0.192762	S	Cancer	8137	0.75018
1196	2429	Normal	Prostate																			HN25_P25_C04_S316_comb	0.323349	0.352631	0.137621	12.2443	-0.154394	-0.066876	G1	Cancer	3991	0
1197	3666	Normal	Prostate																			HN25_P25_C07_S319_comb	0.417115	0.66689	0.141312	12.6075	-0.0592619	-0.16728	G1	Cancer	7552	0
1198	2879	Normal	Prostate																			HN25_P25_C08_S320_comb	0.410125	0.374458	0.147194	13.0135	-0.112727	-0.107308	G1	Normal	3894	0
1199	2087	Normal	Prostate																			HN25_P25_C09_S321_comb	0.392401	0.36754	0.144591	13.4816	-0.106226	-0.147694	G1	Normal	3942	0
12	1606	Normal	Prostate																			HN25_P25_C10_S322_comb	0.6209	0.98256	0.164074	14.5224	-0.00990505	0.791468	G2M	Cancer	8822	3.6037
120	2161	Normal	Prostate																			HN25_P25_C11_S323_comb	0.343063	0.386954	0.133981	12.2793	-0.079082	-0.0592048	G1	Normal	4459	0
121	2133	Normal	Prostate																			HN25_P25_D05_S329_comb	0.427526	0.710245	0.153031	13.2299	-0.0176606	-0.0846732	G1	Cancer	6920	0
122	1965	Normal	Prostate																			HN25_P25_D07_S331_comb	0.37813	0.352262	0.144798	13.1647	-0.0549733	-0.144788	G1	Normal	3477	0
1226	2725	Normal	Prostate																			HN25_P25_D09_S333_comb	0.323756	0.594533	0.127086	11.6789	-0.102581	-0.165685	G1	Cancer	7099	0
1227	3347	Normal	Prostate																			HN25_P25_E01_S337_comb	0.317898	0.339357	0.117144	12.1156	-0.159467	-0.0539991	G1	Normal	3523	0
1228	2641	Normal	Prostate																			HN25_P25_E02_S338_comb	0.337379	0.293345	0.127185	12.1205	-0.129786	-0.127647	G1	Normal	3297	0
1229	2290	Normal	Prostate																			HN25_P25_E06_S342_comb	0.437831	0.345021	0.151544	14.3104	-0.0922908	-0.00239747	G1	Normal	3330	0
123	1607	Normal	Prostate																			HN25_P25_E07_S343_comb	0.3035	0.30742	0.123996	11.9401	-0.111137	-0.13802	G1	Normal	3599	0
1230	2946	Normal	Prostate																			HN25_P25_E08_S344_comb	0.369017	0.662692	0.133267	12.0708	-0.189632	-0.114672	G1	Cancer	7680	0
1231	2596	Normal	Prostate																			HN25_P25_E12_S348_comb	0.360062	0.501726	0.1307	12.383	-0.140248	-0.148803	G1	Normal	5588	0
1232	1891	Normal	Prostate																			HN25_P25_F01_S349_comb	0.349373	0.346212	0.135295	12.7915	-0.149044	-0.0102117	G1	Normal	3363	0
1233	4280	Normal	Prostate																			HN25_P25_F03_S351_comb	0.299319	0.365188	0.120901	12.4635	-0.0941707	-0.0528898	G1	Normal	3228	0
1234	1587	Normal	Prostate																			HN25_P25_F05_S353_comb	0.257671	0.257985	0.10714	11.3386	-0.0811631	-0.118525	G1	Normal	3000	0
1235	2471	Normal	Prostate																			HN25_P25_F11_S359_comb	0.325859	0.36039	0.109732	11.9745	-0.19587	-0.196653	G1	Normal	4323	0
1236	2346	Normal	Prostate																			HN25_P25_G02_S362_comb	0.338093	0.66087	0.13055	12.146	-0.121752	-0.104891	G1	Cancer	7074	0.14012
1237	2573	Normal	Prostate																			HN25_P25_G11_S371_comb	0.341569	0.532371	0.130663	12.2886	-0.0895455	-0.201766	G1	Cancer	5558	0
1238	3159	Normal	Prostate																			HN25_P25_G12_S372_comb	0.360303	0.643226	0.1301	12.1014	-0.11998	-0.163879	G1	Cancer	7330	0
1239	2659	Normal	Prostate																			HN25_P25_H06_S378_comb	0.345246	0.454764	0.139582	12.8325	-0.113667	-0.139575	G1	Cancer	4130	0
124	2730	Normal	Prostate																			HN25_P5_A05_S5_comb	0.388298	0.320416	0.134408	12.7076	-0.12933	-0.0470589	G1	Normal	3559	0
1240	2756	Normal	Prostate																			HN25_P5_A06_S6_comb	0.415349	0.663557	0.133689	13.0079	-0.0686546	-0.141985	G1	Cancer	6512	0
1241	2869	Normal	Prostate																			HN25_P5_A07_S7_comb	0.625266	0.973442	0.173851	14.7946	0.180158	0.700289	G2M	Cancer	8217	3.1042
1242	2677	Normal	Prostate																			HN25_P5_A08_S8_comb	0.291974	0.39622	0.126004	11.7264	-0.0975231	-0.0747806	G1	Normal	4528	0
1243	3073	Normal	Prostate																			HN25_P5_A09_S9_comb	0.185005	0.238179	0.115816	11.8366	-0.119582	-0.123861	G1	Normal	2016	0
1244	2647	Normal	Prostate																			HN25_P5_A10_S10_comb	0.327123	0.52872	0.133597	12.2572	-0.247582	-0.0999648	G1	Normal	5337	0
1245	2553	Normal	Prostate																			HN25_P5_A12_S12_comb	0.289813	0.404767	0.131744	12.1981	-0.122034	-0.115959	G1	Normal	3929	0
1246	2769	Normal	Prostate																			HN25_P5_B01_S13_comb	0.383635	0.365121	0.141289	13.3032	-0.0779956	-0.0912063	G1	Normal	3557	0
1247	2642	Normal	Prostate																			HN25_P5_B02_S14_comb	0.378473	0.413316	0.136477	13.4932	-0.100405	-0.175314	G1	Normal	3402	0
1248	3180	Normal	Prostate																			HN25_P5_B03_S15_comb	0.366538	0.461271	0.1423	12.8852	-0.10268	-0.136281	G1	Normal	4468	0
1249	2165	Normal	Prostate																			HN25_P5_B07_S19_comb	0.355696	0.258717	0.137901	13.4183	-0.125934	-0.00704176	G1	Normal	2001	0
125	1528	Normal	Prostate																			HN25_P5_B08_S20_comb	0.29638	0.276904	0.122987	12.2176	-0.0916598	-0.086579	G1	Normal	3119	0
1250	2228	Normal	Prostate																			HN25_P5_B09_S21_comb	0.360483	0.681142	0.140108	12.354	-0.0576856	-0.109351	G1	Cancer	7275	0
1251	2518	Normal	Prostate																			HN25_P5_B10_S22_comb	0.373685	0.58445	0.127262	12.5156	-0.0360604	-0.206534	G1	Cancer	5912	0
1252	4816	Normal	Prostate																			HN25_P5_B12_S24_comb	0.324411	0.622328	0.124316	11.997	-0.00504847	-0.145337	G1	Cancer	6643	0
1253	2703	Normal	Prostate																			HN25_P5_C02_S26_comb	0.397132	0.563979	0.146236	12.9868	-0.0589203	-0.066514	G1	Cancer	5714	0
1254	2769	Normal	Prostate																			HN25_P5_C05_S29_comb	0.358163	0.558599	0.121653	12.2344	-0.175519	-0.185237	G1	Normal	6423	0
1255	2520	Normal	Prostate																			HN25_P5_C08_S32_comb	0.362336	0.415457	0.134584	12.5298	-0.13864	-0.10929	G1	Normal	4636	0
1256	1552	Normal	Prostate																			HN25_P5_C09_S33_comb	0.360191	0.597297	0.117765	11.7567	-0.198088	-0.195113	G1	Cancer	7299	0
1257	2845	Normal	Prostate																			HN25_P5_C10_S34_comb	0.344865	0.325535	0.130723	12.4962	-0.124616	-0.0882266	G1	Normal	3474	0
1258	2282	Normal	Prostate																			HN25_P5_C12_S36_comb	0.271862	0.449006	0.111793	11.0369	-0.178905	-0.0921195	G1	Normal	5718	0
1259	2616	Normal	Prostate																			HN25_P5_D01_S37_comb	0.369983	0.297599	0.136427	12.5321	-0.0967642	-0.11518	G1	Normal	3176	0
126	2228	Normal	Prostate																			HN25_P5_D02_S38_comb	0.366112	0.405176	0.138972	12.6574	-0.176266	-0.160537	G1	Normal	3947	0
1260	3116	Normal	Prostate																			HN25_P5_D05_S41_comb	0.374976	0.30366	0.141485	13.1781	-0.126212	-0.0304196	G1	Normal	3242	0
1261	2813	Normal	Prostate																			HN25_P5_D07_S43_comb	0.379712	0.550769	0.136552	12.5443	-0.145857	-0.122347	G1	Normal	6087	0
1262	2962	Normal	Prostate																			HN25_P5_D08_S44_comb	0.427111	0.727488	0.133599	12.5473	-0.0181811	-0.140041	G1	Cancer	8091	0
1263	4700	Normal	Prostate																			HN25_P5_D10_S46_comb	0.430672	0.406849	0.152154	13.7919	-0.138532	-0.131231	G1	Normal	3819	0
1264	3287	Normal	Prostate																			HN25_P5_E01_S49_comb	0.319911	0.641978	0.128861	12.3726	-0.0405803	-0.0948648	G1	Cancer	6037	2.0597
1265	2311	Normal	Prostate																			HN25_P5_E03_S51_comb	0.332633	0.261738	0.136644	12.9563	-0.0446831	-0.033625	G1	Normal	2707	0
127	1628	Normal	Prostate																			HN25_P5_E04_S52_comb	0.334523	0.39313	0.120661	12.1223	-0.158597	-0.164891	G1	Normal	4185	0
128	1921	Normal	Prostate																			HN25_P5_E05_S53_comb	0.276584	0.482481	0.115415	11.3302	-0.00500892	-0.181433	G1	Normal	5701	0
129	1901	Normal	Prostate																			HN25_P5_E06_S54_comb	0.421024	0.542165	0.151312	13.506	-0.0480436	-0.147383	G1	Normal	5173	0
1294	508	Normal	Prostate																			HN25_P5_E07_S55_comb	0.395628	0.58969	0.149567	13.2407	-0.0762623	-0.0451219	G1	Cancer	5709	2.2268
13	1195	Normal	Prostate																			HN25_P5_E09_S57_comb	0.415419	0.759212	0.146905	12.7284	-0.101683	-0.145634	G1	Cancer	8093	0
130	2236	Normal	Prostate																			HN25_P5_E11_S59_comb	0.344121	0.651436	0.131228	12.5746	-0.106017	-0.149983	G1	Cancer	6244	0
131	1121	Normal	Prostate																			HN25_P5_E12_S60_comb	0.365385	0.515888	0.13468	13.0483	-0.143476	-0.102679	G1	Normal	4615	0
132	1869	Normal	Prostate																			HN25_P5_F01_S61_comb	0.441202	0.447495	0.155187	14.4769	-0.140845	-0.00714226	G1	Normal	3792	0
133	888	Normal	Prostate																			HN25_P5_F02_S62_comb	0.330893	0.332258	0.148716	12.5722	-0.105629	-0.125805	G1	Normal	3045	0
134	1860	Normal	Prostate																			HN25_P5_F06_S66_comb	0.348183	0.339459	0.136987	12.8646	-0.0446088	-0.105353	G1	Normal	3633	0
135	1955	Normal	Prostate																			HN25_P5_F08_S68_comb	0.403705	0.496921	0.154003	13.5592	-0.103963	-0.101781	G1	Normal	4704	0
136	2179	Normal	Prostate																			HN25_P5_F09_S69_comb	0.543857	0.859454	0.155438	14.3394	0.0679459	0.568961	G2M	Cancer	7614	3.5445
137	2186	Normal	Prostate																			HN25_P5_F11_S71_comb	0.590597	0.947462	0.149484	14.6644	0.704506	0.224234	S	Cancer	7738	0.14666
1373	1881	Normal	Prostate																			HN25_P5_F12_S72_comb	0.316295	0.424011	0.12881	12.3542	-0.159772	-0.0679046	G1	Cancer	4024	0
1374	1945	Normal	Prostate																			HN25_P5_G05_S77_comb	0.356755	0.532424	0.132055	12.1031	-0.225781	-0.0550246	G1	Cancer	6043	0.029983
1375	1809	Normal	Prostate																			HN25_P5_G08_S80_comb	0.287322	0.297603	0.128944	12.2337	-0.0605754	-0.190592	G1	Normal	3494	0
1376	2198	Normal	Prostate																			HN25_P5_G09_S81_comb	0.366493	0.442847	0.134734	12.4548	-0.0456545	-0.139166	G1	Normal	4939	0
1377	1660	Normal	Prostate																			HN25_P5_G10_S82_comb	0.363156	0.540364	0.149988	12.3688	-0.143854	-0.168512	G1	Normal	5997	0
1378	1915	Normal	Prostate																			HN25_P5_G12_S84_comb	0.338423	0.397401	0.130048	12.6934	-0.194157	-0.167556	G1	Normal	4393	0
1379	1734	Normal	Prostate																			HN25_P5_H01_S85_comb	0.348459	0.429654	0.131194	12.5002	-0.0805588	-0.102233	G1	Normal	4528	0
138	1980	Normal	Prostate																			HN25_P5_H03_S87_comb	0.252703	0.235129	0.11871	12.05	-0.15197	-0.110619	G1	Normal	2268	0
1380	2364	Normal	Prostate																			HN25_P5_H05_S89_comb	0.378158	0.367676	0.132918	13.4998	-0.0911009	-0.0640705	G1	Normal	3275	0
1381	2280	Normal	Prostate																			HN25_P5_H06_S90_comb	0.339449	0.279635	0.128907	12.2262	-0.112873	-0.0937068	G1	Normal	3145	0
1382	2328	Normal	Prostate																			HN25_P5_H07_S91_comb	0.348082	0.405535	0.138879	12.6314	-0.0667319	-0.192207	G1	Normal	4055	0
1383	1679	Normal	Prostate																			HN25_P5_H08_S92_comb	0.297198	0.186541	0.124834	11.7793	-0.0967985	-0.108372	G1	Normal	2653	0
1384	2333	Normal	Prostate																			HN25_P5_H09_S93_comb	0.379459	0.273615	0.1395	13.1891	-0.104021	-0.0346373	G1	Normal	2710	0
1385	1959	Normal	Prostate																			HN25_P5_H11_S95_comb	0.408492	0.404738	0.142799	12.9752	-0.0773871	-0.165094	G1	Normal	4205	0
1386	1938	Normal	Prostate																			HN26_P13_A02_S98_comb	0.357689	0.260325	0.133543	12.7394	-0.0998365	-0.0446836	G1	Normal	3218	0
1387	2068	Normal	Prostate																			HN26_P13_A08_S104_comb	0.332671	0.550834	0.133499	11.76	-0.0889993	-0.12238	G1	Cancer	6716	0
1388	3097	Normal	Prostate																			HN26_P13_A11_S107_comb	0.286621	0.347983	0.127492	11.6146	-0.134437	-0.149715	G1	Normal	4294	0
1389	2271	Normal	Prostate																			HN26_P13_B04_S112_comb	0.346964	0.517169	0.129873	11.8201	-0.0617913	-0.0769959	G1	Cancer	6592	0
139	1749	Normal	Prostate																			HN26_P13_C04_S124_comb	0.317096	0.355235	0.114359	12.0499	-0.158787	-0.14402	G1	Cancer	3979	0
1390	2005	Normal	Prostate																			HN26_P13_D01_S133_comb	0.325933	0.409454	0.12415	11.6845	-0.12784	-0.153026	G1	Cancer	5071	0
1391	2073	Normal	Prostate																			HN26_P13_E09_S153_comb	0.362099	0.313649	0.109208	12.44	-0.0459492	-0.112134	G1	Normal	3526	0
1392	2548	Normal	Prostate																			HN26_P13_E12_S156_comb	0.344542	0.455019	0.137414	11.6975	-0.0650654	-0.0631936	G1	Cancer	6034	0
1393	1542	Normal	Prostate																			HN26_P13_F04_S160_comb	0.388181	0.329217	0.14015	13.5751	-0.0209461	-0.0794335	G1	Normal	3162	0
1394	2308	Normal	Prostate																			HN26_P13_F07_S163_comb	0.309703	0.299801	0.11225	12.0503	-0.0697242	-0.0816263	G1	Normal	3400	0
1395	2061	Normal	Prostate																			HN26_P13_F12_S168_comb	0.315404	0.520691	0.13416	11.7587	-0.115529	-0.0930469	G1	Cancer	6225	0
1396	2301	Normal	Prostate																			HN26_P13_G01_S169_comb	0.356489	0.46408	0.143224	14.5969	0.702407	0.247129	S	Cancer	2881	0
1397	1646	Normal	Prostate																			HN26_P13_G06_S174_comb	0.310713	0.275544	0.123048	12.6366	-0.112083	-0.101209	G1	Normal	2794	0
1398	1859	Normal	Prostate																			HN26_P13_G10_S178_comb	0.336576	0.364285	0.130128	12.381	-0.122896	-0.144483	G1	Normal	3846	0
1399	1983	Normal	Prostate																			HN26_P13_H09_S189_comb	0.357772	0.231433	0.136546	12.8724	-0.0983468	-0.125693	G1	Normal	2501	0
14	1739	Normal	Prostate																			HN26_P14_A01_S193_comb	0.32981	0.615555	0.130086	11.8839	-0.0936668	-0.0926853	G1	Cancer	7119	0
140	2070	Normal	Prostate																			HN26_P14_A02_S194_comb	0.417247	0.291104	0.13976	13.6635	-0.0897137	-0.100455	G1	Normal	2809	0
1400	1803	Normal	Prostate																			HN26_P14_A04_S196_comb	0.308829	0.574965	0.134587	11.2707	-0.204533	-0.0984122	G1	Cancer	8057	0
1401	1797	Normal	Prostate																			HN26_P14_A05_S197_comb	0.356511	0.30434	0.118646	12.3076	-0.0958366	-0.133684	G1	Normal	3178	0
1402	2142	Normal	Prostate																			HN26_P14_A12_S204_comb	0.422122	0.415967	0.141839	14.1798	-0.117391	-0.147533	G1	Normal	3877	0
1403	1966	Normal	Prostate																			HN26_P14_B03_S207_comb	0.409172	0.700588	0.138719	12.9651	0.567262	0.164745	S	Cancer	6902	2.0007
1404	1897	Normal	Prostate																			HN26_P14_B04_S208_comb	0.197617	0.189217	0.109807	10.903	-0.097241	-0.0722601	G1	Cancer	2053	0
1405	2009	Normal	Prostate																			HN26_P14_B09_S213_comb	0.34521	0.614037	0.124228	11.7846	-0.0835166	-0.0604315	G1	Cancer	7443	1.4484
1406	2177	Normal	Prostate																			HN26_P14_C05_S221_comb	0.302344	0.207071	0.126432	12.1387	-0.124036	-0.0835629	G1	Normal	2437	0
1407	2208	Normal	Prostate																			HN26_P14_C09_S225_comb	0.353046	0.240219	0.138019	13.3754	-0.109458	-0.0938856	G1	Normal	2543	0
1408	2107	Normal	Prostate																			HN26_P14_C10_S226_comb	0.312931	0.401626	0.137455	13.228	-0.133587	-0.139243	G1	Cancer	3125	0
1409	2227	Normal	Prostate																			HN26_P14_D01_S229_comb	0.333768	0.284096	0.128071	12.3533	-0.116936	-0.119978	G1	Normal	2907	0
141	2064	Normal	Prostate																			HN26_P14_D03_S231_comb	0.35518	0.360094	0.142716	12.8528	-0.0506555	-0.10648	G1	Normal	3987	0
1410	1542	Normal	Prostate																			HN26_P14_D04_S232_comb	0.293971	0.487894	0.123805	11.4257	-0.0822476	-0.205793	G1	Cancer	6144	0
1411	3023	Normal	Prostate																			HN26_P14_D05_S233_comb	0.365248	0.457223	0.154205	14.8068	0.277687	0.859854	G2M	Cancer	2948	3.3821
1412	1879	Normal	Prostate																			HN26_P14_D06_S234_comb	0.232362	0.279778	0.101126	10.3042	-0.123954	-0.130189	G1	Cancer	4494	0
1413	2245	Normal	Prostate																			HN26_P14_D07_S235_comb	0.334896	0.222003	0.123338	12.2136	-0.0669404	-0.115435	G1	Normal	2490	0
1414	1881	Normal	Prostate																			HN26_P14_D08_S236_comb	0.346757	0.293421	0.123978	12.1951	-0.140169	-0.0192755	G1	Normal	3374	0
1415	2332	Normal	Prostate																			HN26_P14_D10_S238_comb	0.335514	0.548678	0.120278	11.7575	-0.0821458	-0.137015	G1	Cancer	7102	0
1416	1584	Normal	Prostate																			HN26_P14_D11_S239_comb	0.352707	0.639779	0.13746	12.4097	-0.0961291	-0.0589843	G1	Cancer	6965	0
1417	2082	Normal	Prostate																			HN26_P14_E01_S241_comb	0.35423	0.313815	0.12837	12.5751	-0.165159	-0.0374904	G1	Normal	3446	0
1418	2025	Normal	Prostate																			HN26_P14_E08_S248_comb	0.285179	0.318825	0.107466	11.7884	-0.139223	-0.106228	G1	Normal	3392	0
1419	1710	Normal	Prostate																			HN26_P14_E09_S249_comb	0.347623	0.292854	0.137421	13.0449	-0.00317011	-0.0831066	G1	Normal	3003	0
142	2007	Normal	Prostate																			HN26_P14_E12_S252_comb	0.39214	0.648653	0.14253	12.3824	-0.0508221	-0.0204843	G1	Cancer	7422	0
1420	2164	Normal	Prostate																			HN26_P14_F02_S254_comb	0.406957	0.411832	0.152625	14.5175	-0.00957568	0.905314	G2M	Cancer	2960	0
1421	2175	Normal	Prostate																			HN26_P14_F03_S255_comb	0.328466	0.577934	0.132489	11.8488	-0.222007	-0.117299	G1	Cancer	7008	0
1422	2273	Normal	Prostate																			HN26_P14_F05_S257_comb	0.321834	0.168182	0.122657	11.8208	-0.0871961	-0.0327157	G1	Normal	2518	0
1423	1963	Normal	Prostate																			HN26_P14_F07_S259_comb	0.468703	0.316642	0.158622	15.3224	-0.0665824	-0.0572156	G1	Normal	2378	0
1424	1721	Normal	Prostate																			HN26_P14_F10_S262_comb	0.39525	0.648843	0.132058	12.4683	-0.0410796	-0.00873787	G1	Cancer	7322	0
1425	1536	Normal	Prostate																			HN26_P14_G04_S268_comb	0.422791	0.368574	0.138498	13.1974	-0.119769	-0.135334	G1	Normal	3746	0
1426	2047	Normal	Prostate																			HN26_P14_G10_S274_comb	0.345887	0.574584	0.134904	13.1425	-0.0187288	-0.0869582	G1	Cancer	4997	0
1427	1756	Normal	Prostate																			HN26_P14_G11_S275_comb	0.318825	0.239564	0.13113	12.6612	-0.0887436	-0.119177	G1	Normal	2724	0
1428	1918	Normal	Prostate																			HN26_P14_H03_S279_comb	0.342637	0.55961	0.120589	11.9676	-0.0287157	-0.12851	G1	Cancer	6490	0
1429	2001	Normal	Prostate																			HN26_P14_H05_S281_comb	0.326311	0.325044	0.120157	12.2511	-0.0964425	-0.0568894	G1	Normal	3451	0
143	2455	Normal	Prostate																			HN26_P14_H06_S282_comb	0.553389	0.879752	0.173524	14.5663	-0.0144077	0.753992	G2M	Cancer	7744	2.0986
1430	998	Normal	Prostate																			HN26_P14_H08_S284_comb	0.33105	0.290432	0.136472	12.5718	-0.182023	-0.0873127	G1	Normal	3311	0
1431	1748	Normal	Prostate																			HN26_P25_A01_S97_comb	0.427285	0.598442	0.161481	14.5196	0.00378642	0.539166	G2M	Cancer	4506	0
1432	1094	Normal	Prostate																			HN26_P25_A03_S99_comb	0.369592	0.331617	0.148837	14.1736	0.596928	0.152897	S	Cancer	2276	0
1433	2594	Normal	Prostate																			HN26_P25_A05_S101_comb	0.325092	0.649766	0.122086	11.9619	-0.145176	-0.150728	G1	Cancer	7043	0
1434	1870	Normal	Prostate																			HN26_P25_A07_S103_comb	0.212581	0.258907	0.119685	11.8129	-0.0234196	-0.00797307	G1	Normal	2109	0
1435	1926	Normal	Prostate																			HN26_P25_A08_S104_comb	0.316189	0.417738	0.119543	11.8458	-0.0711146	-0.0436711	G1	Cancer	4706	0
1436	2151	Normal	Prostate																			HN26_P25_A11_S107_comb	0.385918	0.522035	0.144952	13.5032	-0.0376009	-0.0949419	G1	Normal	4458	0
1437	2628	Normal	Prostate																			HN26_P25_A12_S108_comb	0.355179	0.640374	0.134039	12.0611	-0.0813461	-0.103854	G1	Cancer	7206	0
1438	704	Normal	Prostate																			HN26_P25_B03_S111_comb	0.341124	0.566533	0.119266	11.8949	-0.215796	-0.0863193	G1	Cancer	6421	0
1439	2047	Normal	Prostate																			HN26_P25_B05_S113_comb	0.298675	0.46333	0.120871	11.9209	-0.117701	-0.1708	G1	Cancer	4909	0
144	1163	Normal	Prostate																			HN26_P25_B07_S115_comb	0.393918	0.649732	0.134211	12.4465	-0.0936732	-0.135079	G1	Cancer	7065	0
1440	1585	Normal	Prostate																			HN26_P25_B08_S116_comb	0.373142	0.646689	0.14036	12.7649	-0.0418666	-0.0935193	G1	Cancer	6552	0
1441	2223	Normal	Prostate																			HN26_P25_B10_S118_comb	0.313368	0.341375	0.126895	11.8416	-0.195717	-0.0625675	G1	Cancer	4060	0
1442	2318	Normal	Prostate																			HN26_P25_C02_S122_comb	0.303178	0.589497	0.131193	11.6276	-0.123929	-0.14341	G1	Cancer	6994	0
1443	2737	Normal	Prostate																			HN26_P25_C04_S124_comb	0.286904	0.491793	0.134573	11.5112	-0.128502	-0.20744	G1	Cancer	6052	0
1444	2055	Normal	Prostate																			HN26_P25_C07_S127_comb	0.31685	0.42448	0.139143	12.4779	-0.166112	-0.0171603	G1	Cancer	4010	0
1445	2132	Normal	Prostate																			HN26_P25_C09_S129_comb	0.349909	0.482118	0.133255	12.0061	-0.185465	-0.202018	G1	Cancer	5970	0
1446	1773	Normal	Prostate																			HN26_P25_C12_S132_comb	0.336707	0.593048	0.134	12.1523	-0.148954	-0.14598	G1	Cancer	6580	0
1447	2450	Normal	Prostate																			HN26_P25_D02_S134_comb	0.391029	0.592008	0.142	12.7657	-0.156627	-0.134772	G1	Cancer	6121	0
1448	2151	Normal	Prostate																			HN26_P25_D04_S136_comb	0.331987	0.269036	0.127759	12.8567	-0.116458	-0.146635	G1	Normal	2473	0
1449	2027	Normal	Prostate																			HN26_P25_D05_S137_comb	0.214301	0.325998	0.113664	11.3063	-0.084518	-0.220323	G1	Cancer	3237	0
145	494	Normal	Prostate																			HN26_P25_D08_S140_comb	0.316695	0.581608	0.128661	11.8975	-0.138135	-0.133636	G1	Cancer	6638	0
1450	1699	Normal	Prostate																			HN26_P25_E02_S146_comb	0.339795	0.547759	0.125547	12.0311	-0.153427	-0.14802	G1	Cancer	6091	0
1451	1995	Normal	Prostate																			HN26_P25_E03_S147_comb	0.327074	0.637598	0.130068	11.7291	-0.141684	-0.125179	G1	Cancer	7478	0
1452	2234	Normal	Prostate																			HN26_P25_E04_S148_comb	0.291023	0.549337	0.124797	11.3269	-0.132058	-0.135358	G1	Cancer	6989	0
1453	2064	Normal	Prostate																			HN26_P25_E12_S156_comb	0.357423	0.272343	0.132205	13.1772	-0.144372	-0.128278	G1	Normal	2558	0
1454	2174	Normal	Prostate																			HN26_P25_F02_S158_comb	0.328589	0.560538	0.124946	11.8395	-0.0867341	-0.157949	G1	Cancer	6491	0
1455	611	Normal	Prostate																			HN26_P25_F10_S166_comb	0.348169	0.652452	0.123034	11.8729	-0.053494	-0.140548	G1	Cancer	7450	0
1456	1890	Normal	Prostate																			HN26_P25_G03_S171_comb	0.318914	0.426168	0.128294	11.7371	-0.0290413	-0.101037	G1	Cancer	4998	0
1457	2073	Normal	Prostate																			HN26_P25_G05_S173_comb	0.253858	0.267534	0.119507	11.8554	-0.147005	-0.0962914	G1	Cancer	2369	0
1458	2287	Normal	Prostate																			HN26_P25_G06_S174_comb	0.350164	0.228792	0.13088	12.944	-0.110692	-0.151661	G1	Normal	2090	0
1459	2274	Normal	Prostate																			HN26_P25_G08_S176_comb	0.349135	0.538333	0.132693	12.3531	-0.130063	-0.0544485	G1	Cancer	5800	0
146	1888	Normal	Prostate																			HN26_P25_H04_S184_comb	0.357611	0.694334	0.132925	12.2028	-0.0959112	-0.14514	G1	Cancer	7697	0
1460	1689	Normal	Prostate																			HN26_P25_H06_S186_comb	0.275205	0.444563	0.107508	11.2378	-0.223973	-0.15549	G1	Cancer	5441	0
1461	2113	Normal	Prostate																			HN26_P25_H08_S188_comb	0.333019	0.609347	0.120604	12.0291	-0.139028	-0.0794568	G1	Cancer	6516	0
1465	1490	Normal	Prostate																			HN26_P25_H09_S189_comb	0.334433	0.611359	0.117078	11.7968	-0.109873	-0.155475	G1	Cancer	7355	0
147	1863	Normal	Prostate																			HN26_P26_A03_S291_comb	0.352405	0.265301	0.123532	12.7041	-0.0850724	-0.112048	G1	Normal	2626	0
148	1527	Normal	Prostate																			HN26_P26_A10_S298_comb	0.37259	0.663431	0.1329	12.0154	-0.16152	-0.110589	G1	Cancer	7908	0
149	2042	Normal	Prostate																			HN26_P26_A12_S300_comb	0.287366	0.440777	0.115597	10.9919	-0.18256	-0.0645016	G1	Cancer	6167	0
15	1616	Normal	Prostate																			HN26_P26_B01_S301_comb	0.355626	0.640464	0.136098	12.0367	-0.0229244	-0.0815482	G1	Cancer	7381	0
150	2134	Normal	Prostate																			HN26_P26_B02_S302_comb	0.502097	0.757185	0.165491	13.9785	-0.012381	0.675094	G2M	Cancer	7124	1.7677
151	2508	Normal	Prostate																			HN26_P26_B04_S304_comb	0.284293	0.266438	0.117636	11.8833	-0.0693905	-0.0427307	G1	Normal	2801	0
152	948	Normal	Prostate																			HN26_P26_B07_S307_comb	0.329612	0.490798	0.135776	12.2008	-0.120797	-0.117798	G1	Cancer	5719	0
153	2049	Normal	Prostate																			HN26_P26_B08_S308_comb	0.324636	0.511804	0.118302	11.6712	-0.130771	-0.166266	G1	Cancer	6404	0
1539	1939	Normal	Prostate																			HN26_P26_B09_S309_comb	0.350544	0.613025	0.132728	11.8822	-0.120441	-0.127656	G1	Cancer	7606	0
154	1134	Normal	Prostate																			HN26_P26_B12_S312_comb	0.379657	0.490281	0.136787	12.5337	-0.10188	-0.125254	G1	Cancer	5799	0
1540	1624	Normal	Prostate																			HN26_P26_C05_S317_comb	0.313575	0.567921	0.122904	11.7187	-0.174812	-0.124077	G1	Cancer	6499	0
1541	2988	Normal	Prostate																			HN26_P26_C09_S321_comb	0.322775	0.331062	0.107214	11.7363	-0.0556681	-0.161412	G1	Normal	4016	0
1542	1870	Normal	Prostate																			HN26_P26_C10_S322_comb	0.241459	0.216238	0.112268	11.3126	-0.14858	-0.0729746	G1	Normal	2354	0
1543	1618	Normal	Prostate																			HN26_P26_D10_S334_comb	0.299854	0.320142	0.125898	12.1889	-0.0782387	-0.123832	G1	Normal	3017	0
1544	2125	Normal	Prostate																			HN26_P26_D12_S336_comb	0.327705	0.525078	0.130339	12.0064	-0.140963	-0.114641	G1	Cancer	6168	0
1545	1714	Normal	Prostate																			HN26_P26_E08_S344_comb	0.394267	0.652992	0.14616	12.4209	-0.0890897	-0.122986	G1	Cancer	7438	0
1546	2976	Normal	Prostate																			HN26_P26_E10_S346_comb	0.367442	0.608187	0.126516	12.0386	-0.120818	-0.114193	G1	Cancer	7068	0
1547	1726	Normal	Prostate																			HN26_P26_F02_S350_comb	0.303989	0.437491	0.132084	11.8712	-0.0977992	-0.175063	G1	Cancer	5210	0
1548	2076	Normal	Prostate																			HN26_P26_F06_S354_comb	0.361326	0.643006	0.139022	12.2952	-0.158637	-0.134292	G1	Cancer	7155	0
1549	2645	Normal	Prostate																			HN26_P26_G04_S364_comb	0.342473	0.553738	0.123685	11.9516	-0.156826	-0.0902087	G1	Cancer	6633	0
155	1577	Normal	Prostate																			HN26_P26_G09_S369_comb	0.308456	0.529035	0.130075	11.776	-0.0858427	-0.0449901	G1	Cancer	6364	0
1550	924	Normal	Prostate																			HN26_P26_G10_S370_comb	0.245923	0.297985	0.113764	11.541	-0.0699416	-0.131935	G1	Normal	3375	0
1551	1837	Normal	Prostate																			HN26_P26_H03_S375_comb	0.365438	0.66422	0.135875	12.2189	-0.0613149	-0.139042	G1	Cancer	7476	0
1552	1727	Normal	Prostate																			HN26_P26_H04_S376_comb	0.446815	0.738112	0.143384	13.5445	0.544763	0.00759525	S	Cancer	6736	0
1553	1433	Normal	Prostate																			HN26_P26_H05_S377_comb	0.328646	0.570011	0.12804	11.8456	-0.157725	-0.116842	G1	Cancer	6769	0
1554	2261	Normal	Prostate																			HN26_P26_H09_S381_comb	0.222242	0.350532	0.13008	11.9643	-0.0426624	-0.0191291	G1	Cancer	3198	0
1555	1669	Normal	Prostate																			HN26_P26_H11_S383_comb	0.377244	0.634059	0.131073	12.4985	-0.0400092	-0.0977093	G1	Cancer	6822	0
1556	1555	Normal	Prostate																			HN26_P5_A07_S7_comb	0.460779	0.725821	0.15148	13.425	0.558927	0.176138	S	Cancer	7226	0
1557	1851	Normal	Prostate																			HN26_P5_A09_S9_comb	0.322694	0.471252	0.121827	11.7617	-0.102988	-0.0765393	G1	Cancer	5719	0
1558	1028	Normal	Prostate																			HN26_P5_B04_S16_comb	0.362417	0.26777	0.133269	13	-0.0980408	-0.0994935	G1	Normal	3149	0
1559	2186	Normal	Prostate																			HN26_P5_C03_S27_comb	0.42669	0.224515	0.139143	13.5572	-0.0295274	-0.150939	G1	Normal	2415	0
156	1529	Normal	Prostate																			HN26_P5_C07_S31_comb	0.350389	0.210742	0.136797	13.2253	-0.0341622	-0.0331749	G1	Normal	2350	0
1560	1577	Normal	Prostate																			HN26_P5_D01_S37_comb	0.282064	0.451582	0.12428	11.6291	-0.141614	-0.115182	G1	Cancer	4808	0
1561	2110	Normal	Prostate																			HN26_P5_D09_S45_comb	0.363037	0.542108	0.119143	11.9069	-0.12377	-0.07783	G1	Cancer	6555	0
1562	2350	Normal	Prostate																			HN26_P5_D12_S48_comb	0.384572	0.267079	0.140463	13.3694	-0.119534	-0.0612373	G1	Normal	2525	0
1563	2098	Normal	Prostate																			HN26_P5_E01_S49_comb	0.371636	0.279973	0.139693	13.3237	-0.0797732	-0.132561	G1	Normal	2887	0
1564	1535	Normal	Prostate																			HN26_P5_E08_S56_comb	0.381037	0.248637	0.136719	13.0886	-0.00417399	-0.132213	G1	Normal	2731	0
1565	2066	Normal	Prostate																			HN26_P5_E12_S60_comb	0.399606	0.317496	0.146434	13.7491	-0.0432574	-0.0841189	G1	Normal	2962	0
1566	1916	Normal	Prostate																			HN26_P5_F02_S62_comb	0.462306	0.361224	0.167849	15.8794	-0.0144773	1.00521	G2M	Cancer	2302	0
1567	2269	Normal	Prostate																			HN26_P5_F05_S65_comb	0.407696	0.246709	0.150098	14.6068	-0.0578662	-0.147105	G1	Normal	2111	0
1568	1161	Normal	Prostate																			HN26_P5_F06_S66_comb	0.443843	0.27497	0.151152	14.4818	-0.13904	-0.0974453	G1	Normal	2490	0
1569	1611	Normal	Prostate																			HN26_P5_F12_S72_comb	0.308001	0.346452	0.128917	11.9767	-0.152836	-0.127604	G1	Normal	3559	0
157	2273	Normal	Prostate																			HN26_P5_G02_S74_comb	0.309329	0.191875	0.123896	11.9559	-0.12827	-0.114237	G1	Normal	2398	0
1570	1800	Normal	Prostate																			HN26_P5_G03_S75_comb	0.338041	0.439594	0.125216	12.3605	-0.136996	-0.116914	G1	Normal	4446	0
1571	1382	Normal	Prostate																			HN26_P5_G08_S80_comb	0.487682	0.277544	0.154147	14.7321	-0.0510786	-0.0115345	G1	Normal	2690	0
1572	2078	Normal	Prostate																			HN26_P5_G11_S83_comb	0.327745	0.221708	0.133594	12.6736	-0.116118	-0.0770157	G1	Normal	2546	0
1573	914	Normal	Prostate																			HN26_P5_G12_S84_comb	0.381503	0.266904	0.150456	14.5957	-0.0735332	-0.0728464	G1	Normal	2326	0
1574	1643	Normal	Prostate																			HN26_P5_H04_S88_comb	0.3848	0.393727	0.134248	12.803	-0.125586	-0.194184	G1	Normal	4030	0
1575	1853	Normal	Prostate																			HN26_P5_H08_S92_comb	0.527529	0.778828	0.170805	14.3105	0.13052	0.688801	G2M	Cancer	7356	1.3196
1576	1690	Normal	Prostate																			HN26_P5_H10_S94_comb	0.290467	0.395293	0.118043	11.7597	-0.181059	-0.123624	G1	Cancer	4147	0
1577	942	Normal	Prostate																			HN26_P6_A04_S4_comb	0.348598	0.475534	0.119734	12.4101	-0.0518568	-0.0718973	G1	Cancer	5134	0
1578	1280	Normal	Prostate																			HN26_P6_A05_S5_comb	0.348074	0.578629	0.125718	12.2618	-0.0666665	-0.103794	G1	Cancer	6307	0
1579	2188	Normal	Prostate																			HN26_P6_A08_S8_comb	0.360656	0.254035	0.131221	12.606	-0.0162493	-0.105848	G1	Normal	2940	0
158	1729	Normal	Prostate																			HN26_P6_A09_S9_comb	0.491944	0.343877	0.172946	16.5869	-0.0201945	0.981927	G2M	Cancer	2043	1.1935
1580	1737	Normal	Prostate																			HN26_P6_B04_S16_comb	0.352031	0.639293	0.125457	12.2161	-0.0668396	-0.141769	G1	Cancer	7072	0
1581	1759	Normal	Prostate																			HN26_P6_B05_S17_comb	0.47353	0.65715	0.169286	15.0787	0.0841059	0.824554	G2M	Cancer	4628	0.16092
1582	2279	Normal	Prostate																			HN26_P6_B06_S18_comb	0.374246	0.262875	0.145046	13.8894	-0.0888746	-0.0338304	G1	Normal	2595	0
1583	1612	Normal	Prostate																			HN26_P6_B08_S20_comb	0.336301	0.434622	0.121572	12.0987	-0.161978	-0.0693292	G1	Cancer	4941	0
1584	2017	Normal	Prostate																			HN26_P6_B09_S21_comb	0.395921	0.216644	0.13704	13.3588	-0.00267363	-0.0812906	G1	Normal	2259	0
1585	1975	Normal	Prostate																			HN26_P6_C01_S25_comb	0.361613	0.261524	0.134705	13.1562	-0.160178	-0.0758932	G1	Normal	2593	0
1586	1761	Normal	Prostate																			HN26_P6_C06_S30_comb	0.310587	0.528362	0.117047	11.6161	-0.199473	-0.000690651	G1	Cancer	6399	0.082703
1587	2289	Normal	Prostate																			HN26_P6_D05_S41_comb	0.373259	0.549159	0.136984	12.3503	-0.197115	-0.0783542	G1	Cancer	6316	0
1588	1859	Normal	Prostate																			HN26_P6_D08_S44_comb	0.329012	0.484694	0.118312	11.8259	-0.0856843	-0.0871641	G1	Cancer	5890	0
1589	2331	Normal	Prostate																			HN26_P6_E01_S49_comb	0.348015	0.323085	0.130831	12.6575	-0.0373918	-0.0836409	G1	Normal	3572	0
159	1664	Normal	Prostate																			HN26_P6_E02_S50_comb	0.300708	0.366715	0.132861	12.4681	-0.150413	-0.101854	G1	Normal	3454	0
1590	857	Normal	Prostate																			HN26_P6_F02_S62_comb	0.400506	0.582385	0.146854	13.1491	-0.0492071	-0.0925088	G1	Cancer	5613	0
1591	897	Normal	Prostate																			HN26_P6_F03_S63_comb	0.415226	0.220735	0.14893	14.4323	-0.0773178	-0.0679334	G1	Normal	2207	0
1592	2059	Normal	Prostate																			HN26_P6_F07_S67_comb	0.35076	0.474424	0.125433	12.3832	-0.164274	-0.123642	G1	Normal	4985	0
1593	2161	Normal	Prostate																			HN26_P6_F08_S68_comb	0.371025	0.189239	0.131971	12.9687	-0.0783256	-0.0839074	G1	Normal	2445	0
1594	1798	Normal	Prostate																			HN26_P6_F09_S69_comb	0.239546	0.289135	0.108284	11.2884	-0.154273	-0.157263	G1	Normal	3143	0
1595	1245	Normal	Prostate																			HN26_P6_G01_S73_comb	0.319234	0.429267	0.11666	11.4832	-0.211082	-0.169001	G1	Cancer	5274	0
1596	907	Normal	Prostate																			HN26_P6_G03_S75_comb	0.348418	0.330864	0.130636	12.6624	-0.0820879	-0.147026	G1	Normal	3642	0
1597	2129	Normal	Prostate																			HN26_P6_G04_S76_comb	0.385023	0.24017	0.129255	12.879	-0.0828842	-0.0364101	G1	Normal	2606	0
1598	2005	Normal	Prostate																			HN26_P6_G07_S79_comb	0.343761	0.396989	0.12258	13.0123	-0.109756	-0.112043	G1	Cancer	3345	0
1599	1616	Normal	Prostate																			HN26_P6_H04_S88_comb	0.354517	0.512474	0.124053	12.0788	-0.0887548	-0.151603	G1	Cancer	5948	0
16	1405	Normal	Prostate																			HN26_P6_H11_S95_comb	0.393942	0.281384	0.142142	13.4716	-0.112977	-0.108971	G1	Normal	2665	0
160	1108	Normal	Prostate																			HN26_P6_H12_S96_comb	0.369961	0.323075	0.138204	13.6295	-0.0426201	-0.0439961	G1	Normal	2847	0
1600	486	Normal	Prostate																			HN28_P14_A02_S98_comb	0.351305	0.330335	0.118048	11.9226	-0.0451924	-0.146256	G1	Normal	4028	0
1601	2591	Normal	Prostate																			HN28_P14_A03_S99_comb	0.270083	0.301868	0.115644	11.5789	-0.121921	-0.188086	G1	Normal	3344	0
161	2227	Normal	Prostate																			HN28_P14_A05_S101_comb	0.352192	0.608737	0.120349	12.1662	-0.0471142	-0.0906521	G1	Cancer	6518	0
162	2263	Normal	Prostate																			HN28_P14_A08_S104_comb	0.376281	0.487608	0.138771	12.9394	-0.0350587	-0.0708044	G1	Normal	5030	0
1624	2684	Normal	Prostate																			HN28_P14_A09_S105_comb	0.317645	0.445179	0.133563	12.1237	-0.0528082	-0.102682	G1	Normal	4642	0
1625	3209	Normal	Prostate																			HN28_P14_B03_S111_comb	0.402722	0.358141	0.139634	13.605	-0.125764	-0.0978257	G1	Normal	3429	0
1626	2874	Normal	Prostate																			HN28_P14_B04_S112_comb	0.296017	0.165399	0.118994	11.3813	-0.00168435	-0.159325	G1	Normal	2169	0
1627	2370	Normal	Prostate																			HN28_P14_B05_S113_comb	0.345702	0.316079	0.129993	13.0279	-0.0377502	-0.104445	G1	Normal	2870	0
1628	4324	Normal	Prostate																			HN28_P14_B08_S116_comb	0.272564	0.241632	0.116787	11.4971	-0.118653	-0.0650293	G1	Normal	2749	0
1629	2611	Normal	Prostate																			HN28_P14_B09_S117_comb	0.32077	0.54891	0.126024	12.0586	-0.209215	-0.208086	G1	Normal	5930	0
163	1405	Normal	Prostate																			HN28_P14_B10_S118_comb	0.397113	0.321306	0.149645	13.2872	-0.0486472	-0.0664629	G1	Normal	3283	0
1630	1985	Normal	Prostate																			HN28_P14_B11_S119_comb	0.272373	0.378994	0.113785	11.6131	-0.167658	-0.12369	G1	Normal	4247	0
1631	2585	Normal	Prostate																			HN28_P14_B12_S120_comb	0.28588	0.233451	0.121966	12.0958	-0.172905	-0.160823	G1	Normal	2270	0
1632	1873	Normal	Prostate																			HN28_P14_C01_S121_comb	0.352305	0.308006	0.129121	13.0013	-0.185588	-0.0293241	G1	Normal	3053	0
1633	2262	Normal	Prostate																			HN28_P14_C02_S122_comb	0.346725	0.28183	0.130707	12.593	-0.081147	-0.0720641	G1	Normal	3171	0
1634	1230	Normal	Prostate																			HN28_P14_C04_S124_comb	0.378573	0.258635	0.136167	13.3243	-0.12873	-0.115616	G1	Normal	2298	0
1635	2531	Normal	Prostate																			HN28_P14_C05_S125_comb	0.277861	0.325262	0.122428	12.3652	-0.0848721	-0.142485	G1	Normal	2836	0
1636	4042	Normal	Prostate																			HN28_P14_C09_S129_comb	0.310552	0.415143	0.114554	11.7195	-0.178768	-0.127329	G1	Normal	4478	0
1637	3924	Normal	Prostate																			HN28_P14_C10_S130_comb	0.331087	0.612485	0.132589	12.5085	-0.0657563	-0.120454	G1	Cancer	5688	0
1638	1359	Normal	Prostate																			HN28_P14_C12_S132_comb	0.377089	0.343594	0.125324	12.7931	-0.17581	-0.030841	G1	Normal	3694	0
1639	2673	Normal	Prostate																			HN28_P14_D02_S134_comb	0.426303	0.297729	0.140136	13.4005	-0.0947954	-0.0421475	G1	Normal	3381	0
164	1877	Normal	Prostate																			HN28_P14_D05_S137_comb	0.25384	0.284072	0.127767	12.3872	-0.0876493	-0.128203	G1	Normal	2209	0
1640	2190	Normal	Prostate																			HN28_P14_D06_S138_comb	0.427736	0.320551	0.149841	13.9686	-0.13023	-0.0757705	G1	Normal	3043	0
1641	1619	Normal	Prostate																			HN28_P14_D08_S140_comb	0.4206	0.365027	0.148847	13.3092	-0.123586	-0.0179922	G1	Normal	3632	0
1642	1015	Normal	Prostate																			HN28_P14_D09_S141_comb	0.337684	0.299491	0.123414	12.6823	-0.0492564	-0.133478	G1	Normal	2679	0
1643	2712	Normal	Prostate																			HN28_P14_D10_S142_comb	0.23369	0.286217	0.115159	11.7155	-0.18094	-0.07329	G1	Normal	2672	0
1644	5180	Normal	Prostate																			HN28_P14_E01_S145_comb	0.249389	0.37561	0.119236	11.8313	-0.0893002	-0.0888293	G1	Normal	3417	0
1645	2428	Normal	Prostate																			HN28_P14_E02_S146_comb	0.387335	0.438281	0.139693	13.4569	-0.084152	-0.0828368	G1	Normal	3966	0
1646	2536	Normal	Prostate																			HN28_P14_E03_S147_comb	0.379067	0.347894	0.135718	13.2248	-0.0373809	-0.0962164	G1	Normal	3329	0
1647	2731	Normal	Prostate																			HN28_P14_E07_S151_comb	0.384512	0.341998	0.126284	13.0788	-0.191874	-0.150452	G1	Normal	3508	0
1648	2139	Normal	Prostate																			HN28_P14_E09_S153_comb	0.313859	0.24248	0.125904	12.2425	-0.111995	-0.1134	G1	Normal	2935	0
1649	2279	Normal	Prostate																			HN28_P14_E10_S154_comb	0.410034	0.300001	0.148075	13.6959	-0.00249551	-0.103877	G1	Normal	3032	0
165	1721	Normal	Prostate																			HN28_P14_E11_S155_comb	0.252703	0.19989	0.104289	10.4935	-0.136768	-0.136201	G1	Normal	3059	0
1650	2895	Normal	Prostate																			HN28_P14_F04_S160_comb	0.339836	0.30706	0.131069	12.762	-0.037354	-0.105921	G1	Normal	3247	0
1651	2714	Normal	Prostate																			HN28_P14_F07_S163_comb	0.287003	0.260515	0.114037	11.6928	-0.101963	-0.138034	G1	Normal	2640	0
1652	1009	Normal	Prostate																			HN28_P14_F10_S166_comb	0.322597	0.292555	0.120628	11.64	-0.0622099	-0.11296	G1	Normal	3570	0
1653	3417	Normal	Prostate																			HN28_P14_G02_S170_comb	0.310114	0.456687	0.119267	12.1721	-0.1639	-0.199489	G1	Cancer	4553	0
1654	2116	Normal	Prostate																			HN28_P14_G10_S178_comb	0.277272	0.471273	0.115603	11.8873	-0.119269	-0.11989	G1	Normal	4984	0
1655	3303	Normal	Prostate																			HN28_P14_G11_S179_comb	0.37503	0.34139	0.142155	13.2289	-0.0652799	-0.0984685	G1	Normal	3379	0
1656	3287	Normal	Prostate																			HN28_P14_G12_S180_comb	0.349844	0.29273	0.126135	12.405	-0.0863738	-0.15257	G1	Normal	3119	0
1657	1262	Normal	Prostate																			HN28_P14_H04_S184_comb	0.326449	0.186033	0.129101	13.4613	-0.0201237	-0.0460243	G1	Normal	2185	0
1658	4151	Normal	Prostate																			HN28_P14_H07_S187_comb	0.320467	0.267814	0.114546	12.1308	-0.0215345	-0.0881449	G1	Normal	3158	0
1659	1294	Normal	Prostate																			HN28_P15_A01_S289_comb	0.359704	0.296484	0.122141	12.3575	-0.0456302	-0.152582	G1	Normal	3536	0
166	1910	Normal	Prostate																			HN28_P15_A02_S290_comb	0.328983	0.366273	0.11624	11.8964	-0.0841413	-0.117656	G1	Normal	4301	0
1660	2604	Normal	Prostate																			HN28_P15_A03_S291_comb	0.304363	0.543244	0.117752	12.2548	-0.0154943	-0.10367	G1	Cancer	5287	0
1661	4297	Normal	Prostate																			HN28_P15_A04_S292_comb	0.417385	0.369393	0.135711	13.4485	-0.0709403	-0.110355	G1	Normal	3732	0
1662	2629	Normal	Prostate																			HN28_P15_A06_S294_comb	0.278382	0.214315	0.119875	11.1696	-0.137882	-0.152153	G1	Normal	2940	0
1663	2234	Normal	Prostate																			HN28_P15_A07_S295_comb	0.379253	0.663028	0.135676	12.8593	-0.0461951	-0.065022	G1	Cancer	6399	0
1664	5147	Normal	Prostate																			HN28_P15_A08_S296_comb	0.432098	0.445224	0.163687	13.7846	-0.125299	-0.166985	G1	Normal	4367	0
1665	3604	Normal	Prostate																			HN28_P15_A11_S299_comb	0.348772	0.311263	0.142783	12.6122	-0.175751	-0.0499657	G1	Normal	3231	0
1666	1234	Normal	Prostate																			HN28_P15_B03_S303_comb	0.327037	0.317595	0.129701	12.8799	-0.184428	-0.0787718	G1	Normal	2599	0
1667	4316	Normal	Prostate																			HN28_P15_B05_S305_comb	0.351394	0.366666	0.140831	13.2885	-0.144206	-0.15509	G1	Normal	3282	0
1668	1328	Normal	Prostate																			HN28_P15_B09_S309_comb	0.223777	0.332446	0.115186	10.9419	-0.181713	-0.164085	G1	Normal	4021	0
1669	2242	Normal	Prostate																			HN28_P15_B10_S310_comb	0.345869	0.298043	0.126936	12.4705	-0.0757833	-0.0625878	G1	Normal	3232	0
167	2477	Normal	Prostate																			HN28_P15_B11_S311_comb	0.41418	0.431566	0.148537	13.2768	-0.105035	-0.154754	G1	Normal	4633	0
1670	2749	Normal	Prostate																			HN28_P15_C02_S314_comb	0.48149	0.802346	0.161731	14.3663	0.172638	0.710012	G2M	Cancer	6405	2.4962
1671	4440	Normal	Prostate																			HN28_P15_C04_S316_comb	0.283543	0.231332	0.113641	11.4134	-0.081567	-0.110058	G1	Normal	3177	0
1672	4578	Normal	Prostate																			HN28_P15_C06_S318_comb	0.189104	0.334659	0.11708	12.4433	-0.130025	-0.139861	G1	Normal	2399	0
1673	3807	Normal	Prostate																			HN28_P15_C09_S321_comb	0.369943	0.292699	0.132142	12.5749	-0.119356	-0.151993	G1	Normal	3262	0
1674	5562	Normal	Prostate																			HN28_P15_C11_S323_comb	0.35407	0.355061	0.137186	12.8791	-0.0448924	-0.17963	G1	Normal	3205	0
1675	2374	Normal	Prostate																			HN28_P15_C12_S324_comb	0.358119	0.35985	0.138809	12.8104	-0.0485394	-0.0752013	G1	Normal	3648	0
1676	2106	Normal	Prostate																			HN28_P15_D01_S325_comb	0.380358	0.299722	0.139489	13.1309	-0.0752041	-0.100559	G1	Normal	3098	0
1677	3500	Normal	Prostate																			HN28_P15_D02_S326_comb	0.324981	0.308388	0.125133	11.9595	-0.064533	-0.0860118	G1	Normal	3218	0
1678	1799	Normal	Prostate																			HN28_P15_D06_S330_comb	0.357274	0.38785	0.138918	12.3953	-0.125527	-0.128854	G1	Normal	4286	0
1679	2600	Normal	Prostate																			HN28_P15_D10_S334_comb	0.339994	0.507304	0.125116	12.4973	-0.0353511	-0.0951211	G1	Cancer	5056	0
168	2200	Normal	Prostate																			HN28_P15_D11_S335_comb	0.319127	0.288718	0.117749	11.8352	-0.094389	-0.127712	G1	Normal	3569	0
1680	2946	Normal	Prostate																			HN28_P15_E01_S337_comb	0.335946	0.564853	0.116714	12.0963	-0.0487372	-0.162089	G1	Cancer	5944	0
1681	2843	Normal	Prostate																			HN28_P15_E03_S339_comb	0.356646	0.322201	0.122872	12.2745	-0.176274	-0.169368	G1	Normal	3732	0
1682	3029	Normal	Prostate																			HN28_P15_E11_S347_comb	0.21319	0.267381	0.116911	11.1789	-0.0625256	-0.178926	G1	Normal	2683	0
1683	5995	Normal	Prostate																			HN28_P15_F05_S353_comb	0.286189	0.406896	0.136119	12.5318	-0.0689027	-0.110639	G1	Normal	3434	0
1684	902	Normal	Prostate																			HN28_P15_F08_S356_comb	0.409598	0.315605	0.150491	13.8045	-0.172734	-0.0466572	G1	Normal	3758	0
1685	2874	Normal	Prostate																			HN28_P15_F09_S357_comb	0.406067	0.577798	0.159321	15.0063	0.0856711	0.760351	G2M	Cancer	3787	2.6745
1686	2741	Normal	Prostate																			HN28_P15_F12_S360_comb	0.32587	0.713407	0.118417	12.0106	-0.0910394	-0.081483	G1	Cancer	7219	0
1687	1893	Normal	Prostate																			HN28_P15_G02_S362_comb	0.241906	0.240896	0.114972	11.3836	-0.132762	-0.0333618	G1	Normal	2738	0
1688	2004	Normal	Prostate																			HN28_P15_G03_S363_comb	0.424557	0.770401	0.143817	13.2911	0.51106	-0.023231	S	Cancer	6945	1.546
1689	2188	Normal	Prostate																			HN28_P15_G06_S366_comb	0.375092	0.286167	0.132018	12.6767	-0.13806	-0.114709	G1	Normal	3417	0
169	2287	Normal	Prostate																			HN28_P15_G11_S371_comb	0.282741	0.256931	0.124667	11.8102	-0.0783458	-0.142901	G1	Normal	2580	0
1690	2696	Normal	Prostate																			HN28_P15_H01_S373_comb	0.311835	0.371418	0.127018	12.2501	-0.0346081	-0.0598027	G1	Normal	4142	0
1691	2846	Normal	Prostate																			HN28_P15_H02_S374_comb	0.216659	0.288971	0.100093	10.4303	-0.155495	-0.167532	G1	Normal	4105	0
1692	2664	Normal	Prostate																			HN28_P15_H03_S375_comb	0.37959	0.325881	0.136534	13.0741	-0.0836722	-0.0109458	G1	Normal	3522	0
1693	2374	Normal	Prostate																			HN28_P15_H05_S377_comb	0.336414	0.378574	0.126988	12.1396	-0.142384	-0.077657	G1	Normal	4073	0
1694	2621	Normal	Prostate																			HN28_P15_H07_S379_comb	0.416965	0.372186	0.142	13.6253	-0.146031	-0.0952688	G1	Normal	3781	0
1695	2819	Normal	Prostate																			HN28_P15_H09_S381_comb	0.31177	0.304541	0.111955	11.9207	-0.0411791	-0.122222	G1	Normal	3647	0
1696	2236	Normal	Prostate																			HN28_P15_H10_S382_comb	0.401988	0.404104	0.149023	13.3401	-0.0737243	-0.117342	G1	Normal	4145	0
1697	4067	Normal	Prostate																			HN28_P15_H11_S383_comb	0.320026	0.410131	0.123903	11.825	-0.157876	-0.195428	G1	Normal	4642	0
1698	1155	Normal	Prostate																			HN28_P3P4_A01_S1_comb	0.358309	0.375144	0.140177	12.64	-0.0509494	-0.162306	G1	Normal	3799	0
1699	2124	Normal	Prostate																			HN28_P3P4_A02_S2_comb	0.259007	0.57871	0.108074	11.1077	-0.128207	-0.0878898	G1	Normal	6868	0
17	1362	Normal	Prostate																			HN28_P3P4_A03_S3_comb	0.301973	0.276959	0.11555	11.9307	-0.0147101	-0.14205	G1	Normal	3084	0
170	2200	Normal	Prostate																			HN28_P3P4_A04_S4_comb	0.366907	0.285215	0.129985	12.5379	-0.0871408	-0.0670545	G1	Normal	3300	0
1700	929	Normal	Prostate																			HN28_P3P4_A05_S5_comb	0.263333	0.293802	0.109949	11.0978	-0.130865	-0.141615	G1	Normal	3849	0
1701	2084	Normal	Prostate																			HN28_P3P4_A07_S7_comb	0.313821	0.312871	0.1342	12.8208	-0.140707	-0.103533	G1	Normal	3215	0
1702	4409	Normal	Prostate																			HN28_P3P4_A08_S8_comb	0.39284	0.276044	0.13776	13.2774	-0.0562457	-0.0871751	G1	Normal	3077	0
1703	2270	Normal	Prostate																			HN28_P3P4_A10_S10_comb	0.325597	0.354056	0.12824	12.2595	-0.0923966	-0.13329	G1	Normal	3873	0
1704	2514	Normal	Prostate																			HN28_P3P4_A11_S11_comb	0.301628	0.304756	0.119668	12.023	-0.148642	-0.129788	G1	Normal	3401	0
1705	2404	Normal	Prostate																			HN28_P3P4_A12_S12_comb	0.297198	0.286534	0.116141	11.6941	-0.167431	-0.0991284	G1	Normal	3390	0
1706	2442	Normal	Prostate																			HN28_P3P4_B01_S13_comb	0.235157	0.315882	0.106509	11.4197	-0.198366	-0.166755	G1	Normal	3212	0
1707	3966	Normal	Prostate																			HN28_P3P4_B02_S14_comb	0.300083	0.34155	0.124929	12.8541	-0.0127067	-0.108014	G1	Normal	2685	0
1708	2911	Normal	Prostate																			HN28_P3P4_B04_S16_comb	0.319936	0.31401	0.121883	12.1505	-0.136352	-0.105822	G1	Normal	3385	0
1709	3678	Normal	Prostate																			HN28_P3P4_B05_S17_comb	0.389092	0.224081	0.137094	12.7949	-0.0530653	-0.0563278	G1	Normal	2661	0
1710	1718	Normal	Prostate																			HN28_P3P4_B06_S18_comb	0.262926	0.28664	0.107271	11.3385	-0.181928	-0.165093	G1	Normal	3409	0
1711	2169	Normal	Prostate																			HN28_P3P4_B07_S19_comb	0.443812	0.3481	0.141031	13.5218	-0.175345	-0.139938	G1	Normal	3610	0
1712	2176	Normal	Prostate																			HN28_P3P4_B09_S21_comb	0.427617	0.329009	0.153589	14.221	-0.0500494	-0.135484	G1	Normal	2982	0
1713	1654	Normal	Prostate																			HN28_P3P4_B10_S22_comb	0.338755	0.45311	0.134054	12.4075	-0.0568469	-0.0885716	G1	Normal	4337	0
1714	2159	Normal	Prostate																			HN28_P3P4_B11_S23_comb	0.304982	0.378539	0.131822	11.9662	-0.113955	-0.0887027	G1	Normal	4176	0
1715	4926	Normal	Prostate																			HN28_P3P4_B12_S24_comb	0.304302	0.606278	0.126795	12.4403	-0.0564105	-0.093344	G1	Cancer	5609	1.2066
1716	3460	Normal	Prostate																			HN28_P3P4_C01_S25_comb	0.459923	0.358745	0.150004	14.4056	-0.0506107	-0.0779049	G1	Normal	3211	0
1717	3811	Normal	Prostate																			HN28_P3P4_C02_S26_comb	0.398308	0.30084	0.150222	13.8073	-0.0465433	-0.12575	G1	Normal	2496	0
1718	2758	Normal	Prostate																			HN28_P3P4_C03_S27_comb	0.31607	0.34311	0.118714	12.0922	-0.136358	-0.0635149	G1	Normal	3546	0
1719	1692	Normal	Prostate																			HN28_P3P4_C04_S28_comb	0.299869	0.287382	0.107418	11.4028	-0.145614	-0.126404	G1	Normal	3274	0
1720	879	Normal	Prostate																			HN28_P3P4_C05_S29_comb	0.348433	0.3505	0.124879	12.2587	-0.0859025	-0.117778	G1	Normal	3765	0
1721	3194	Normal	Prostate																			HN28_P3P4_C06_S30_comb	0.428471	0.369736	0.145884	13.4017	-0.0187974	-0.0699266	G1	Normal	3552	0
1722	3051	Normal	Prostate																			HN28_P3P4_C07_S31_comb	0.377161	0.3564	0.138929	13.4442	-0.132556	-0.14249	G1	Normal	3469	0
1723	3973	Normal	Prostate																			HN28_P3P4_C08_S32_comb	0.368432	0.305808	0.133287	12.4628	-0.127373	-0.129983	G1	Normal	3287	0
1724	2014	Normal	Prostate																			HN28_P3P4_C10_S34_comb	0.396983	0.362973	0.14089	13.2259	-0.0740429	-0.0331845	G1	Normal	3377	0
1725	3635	Normal	Prostate																			HN28_P3P4_C11_S35_comb	0.397146	0.274679	0.150292	13.36	-0.0615342	-0.0679893	G1	Normal	3148	0
1726	1749	Normal	Prostate																			HN28_P3P4_C12_S36_comb	0.369064	0.302909	0.128238	12.8182	-0.114509	-0.033597	G1	Normal	3108	0
1727	5068	Normal	Prostate																			HN28_P3P4_D01_S37_comb	0.315814	0.538272	0.128981	12.1488	-0.0948513	-0.112026	G1	Cancer	5686	0
1728	2621	Normal	Prostate																			HN28_P3P4_D03_S39_comb	0.353471	0.221529	0.133273	11.9672	-0.163606	-0.129547	G1	Normal	3006	0
1729	1074	Normal	Prostate																			HN28_P3P4_D04_S40_comb	0.402897	0.34632	0.139446	13.1713	-0.0828231	-0.176499	G1	Normal	3528	0
1730	2135	Normal	Prostate																			HN28_P3P4_D06_S42_comb	0.259286	0.257605	0.122855	12.2921	-0.0428986	-0.183533	G1	Normal	2069	0
1731	2951	Normal	Prostate																			HN28_P3P4_D08_S44_comb	0.369318	0.356785	0.131991	13.1654	-0.0611035	-0.0997283	G1	Normal	3390	0
1732	5008	Normal	Prostate																			HN28_P3P4_D10_S46_comb	0.284537	0.324846	0.122451	12.7917	-0.143247	-0.104883	G1	Normal	2642	0
1733	2774	Normal	Prostate																			HN28_P3P4_E03_S51_comb	0.288941	0.244552	0.118699	11.5336	-0.140326	-0.169659	G1	Normal	2988	0
1734	2839	Normal	Prostate																			HN28_P3P4_E05_S53_comb	0.325252	0.353671	0.129225	12.4778	-0.0109438	-0.126309	G1	Normal	3495	0
1735	1648	Normal	Prostate																			HN28_P3P4_E06_S54_comb	0.388517	0.334078	0.124676	12.9105	-0.0983457	-0.159024	G1	Normal	3359	0
1736	2342	Normal	Prostate																			HN28_P3P4_E07_S55_comb	0.413449	0.313844	0.128605	12.5565	-0.145498	-0.155936	G1	Normal	3818	0
1737	2126	Normal	Prostate																			HN28_P3P4_E08_S56_comb	0.421653	0.307781	0.137133	13.4451	-0.0697857	-0.137938	G1	Normal	3179	0
1738	1793	Normal	Prostate																			HN28_P3P4_E09_S57_comb	0.343973	0.306735	0.130106	12.6992	-0.158295	-0.168796	G1	Normal	3287	0
1739	2709	Normal	Prostate																			HN28_P3P4_E10_S58_comb	0.35797	0.394775	0.139602	13.6298	-0.0488125	-0.142939	G1	Normal	3406	0
174	2440	Normal	Prostate																			HN28_P3P4_E12_S60_comb	0.398436	0.3331	0.128051	12.8163	-0.115614	-0.0881595	G1	Normal	3593	0
1740	1981	Normal	Prostate																			HN28_P3P4_F01_S61_comb	0.25701	0.25829	0.112714	11.2181	-0.100517	-0.151085	G1	Normal	3146	0
1741	3039	Normal	Prostate																			HN28_P3P4_F02_S62_comb	0.379027	0.372701	0.148245	13.9634	-0.0153935	-0.0969394	G1	Normal	3088	0
1742	2663	Normal	Prostate																			HN28_P3P4_F03_S63_comb	0.409665	0.347161	0.137465	13.2184	-0.148005	-0.0739486	G1	Normal	3399	0
1743	2804	Normal	Prostate																			HN28_P3P4_F04_S64_comb	0.304431	0.254014	0.128127	11.6054	-0.105448	-0.169534	G1	Normal	3187	0
1744	2984	Normal	Prostate																			HN28_P3P4_F05_S65_comb	0.276582	0.346826	0.101157	11.6988	-0.00369381	-0.201028	G1	Normal	3878	0
1745	6771	Normal	Prostate																			HN28_P3P4_F07_S67_comb	0.357995	0.502461	0.124659	12.8109	-0.0571604	-0.107173	G1	Normal	5068	0
1746	2973	Normal	Prostate																			HN28_P3P4_F08_S68_comb	0.374515	0.366549	0.144965	12.9424	-0.102959	-0.10791	G1	Normal	3870	0
1747	3189	Normal	Prostate																			HN28_P3P4_F09_S69_comb	0.352758	0.39682	0.130526	12.9634	-0.125644	-0.130117	G1	Normal	3989	0
1748	4829	Normal	Prostate																			HN28_P3P4_F10_S70_comb	0.374174	0.284663	0.137103	13.3458	-0.0728547	-0.134482	G1	Normal	2988	0
1749	2255	Normal	Prostate																			HN28_P3P4_F12_S72_comb	0.191286	0.287241	0.108881	11.4322	-0.127126	-0.173648	G1	Normal	2707	0
1750	2566	Normal	Prostate																			HN28_P3P4_G01_S73_comb	0.261042	0.344778	0.129489	11.2747	-0.113125	-0.205141	G1	Normal	4520	0
1751	4075	Normal	Prostate																			HN28_P3P4_G02_S74_comb	0.259368	0.30393	0.114329	11.5539	-0.167972	-0.172492	G1	Normal	3217	0
1752	2571	Normal	Prostate																			HN28_P3P4_G03_S75_comb	0.298451	0.281816	0.121676	11.8657	-0.0990174	-0.0969296	G1	Normal	3102	0
1753	5990	Normal	Prostate																			HN28_P3P4_G04_S76_comb	0.307331	0.282007	0.120588	11.9936	-0.0415867	-0.0771826	G1	Normal	3273	0
1754	1238	Normal	Prostate																			HN28_P3P4_G05_S77_comb	0.387112	0.286431	0.152925	13.0675	-0.157275	-0.102816	G1	Normal	3465	0
1755	3341	Normal	Prostate																			HN28_P3P4_G07_S79_comb	0.314323	0.321477	0.121435	11.7658	-0.131383	-0.0920977	G1	Normal	3926	0
1756	1197	Normal	Prostate																			HN28_P3P4_G08_S80_comb	0.371618	0.322981	0.148062	13.1244	-0.0441146	-0.145649	G1	Normal	3402	0
1757	3910	Normal	Prostate																			HN28_P3P4_G11_S83_comb	0.345294	0.348385	0.133065	12.969	-0.132418	-0.0105685	G1	Normal	3458	0
1758	2929	Normal	Prostate																			HN28_P3P4_G12_S84_comb	0.396238	0.320887	0.131113	13.0343	-0.122283	-0.148951	G1	Normal	3155	0
1759	3551	Normal	Prostate																			HN28_P3P4_H01_S85_comb	0.461626	0.77574	0.143904	13.8147	0.0855537	0.725895	G2M	Cancer	6639	1.537
1760	2039	Normal	Prostate																			HN28_P3P4_H02_S86_comb	0.381166	0.285408	0.145042	13.4704	-0.16127	-0.0976641	G1	Normal	2430	0
1761	1880	Normal	Prostate																			HN28_P3P4_H03_S87_comb	0.318524	0.300453	0.112804	11.811	-0.119919	-0.117528	G1	Normal	3438	0
1762	4085	Normal	Prostate																			HN28_P3P4_H07_S91_comb	0.41617	0.352696	0.144007	13.9353	-0.0887957	-0.0718226	G1	Normal	3299	0
1763	2611	Normal	Prostate																			HN28_P3P4_H09_S93_comb	0.239284	0.322956	0.103389	11.4287	-0.0145385	-0.0793463	G1	Normal	3373	0
1764	3330	Normal	Prostate																			HN28_P5_A01_S193_comb	0.297855	0.240146	0.124884	11.9535	-0.123543	-0.114377	G1	Normal	2423	0
1765	2106	Normal	Prostate																			HN28_P5_A03_S195_comb	0.418435	0.301981	0.143014	13.77	-0.0554954	-0.0904311	G1	Normal	2650	0
1766	3138	Normal	Prostate																			HN28_P5_A05_S197_comb	0.382023	0.425846	0.149246	13.8038	-0.0699135	-0.103911	G1	Normal	3485	0
1767	2904	Normal	Prostate																			HN28_P5_A08_S200_comb	0.230267	0.294939	0.115363	11.7038	-0.183868	-0.182263	G1	Normal	2913	0
1768	2681	Normal	Prostate																			HN28_P5_A10_S202_comb	0.367641	0.283455	0.140553	13.5274	-0.150977	-0.120271	G1	Normal	2499	0
1769	1320	Normal	Prostate																			HN28_P5_A11_S203_comb	0.251806	0.29329	0.116247	11.9359	-0.0533904	-0.126799	G1	Normal	2721	0
1770	1877	Normal	Prostate																			HN28_P5_B03_S207_comb	0.437086	0.302151	0.157954	14.7669	-0.0921501	-0.103849	G1	Normal	2454	0
1771	1455	Normal	Prostate																			HN28_P5_B04_S208_comb	0.408747	0.435372	0.151303	14.0057	-0.070887	-0.0638908	G1	Normal	3621	0
1772	2174	Normal	Prostate																			HN28_P5_B05_S209_comb	0.44864	0.349798	0.159162	14.6653	-0.0931418	-0.112876	G1	Normal	2745	0
1773	2029	Normal	Prostate																			HN28_P5_B08_S212_comb	0.324445	0.630282	0.137557	12.4414	-0.133265	-0.104123	G1	Cancer	6480	1.0314
1774	4226	Normal	Prostate																			HN28_P5_B09_S213_comb	0.299886	0.547778	0.126892	11.8842	-0.0571927	-0.156416	G1	Cancer	5795	0
1775	2644	Normal	Prostate																			HN28_P5_B10_S214_comb	0.382458	0.366376	0.135982	13.0424	-0.0710673	-0.0803542	G1	Normal	3713	0
1776	4822	Normal	Prostate																			HN28_P5_B11_S215_comb	0.295567	0.369008	0.131168	12.0405	-0.0629815	-0.141453	G1	Normal	3781	0
1777	2023	Normal	Prostate																			HN28_P5_C01_S217_comb	0.21432	0.264572	0.1151	12.1686	-0.129992	-0.131693	G1	Normal	2049	0
1778	4163	Normal	Prostate																			HN28_P5_C02_S218_comb	0.365932	0.28315	0.142629	13.3179	-0.0899793	-0.0675515	G1	Normal	2372	0
1779	6472	Normal	Prostate																			HN28_P5_C07_S223_comb	0.350137	0.212677	0.128186	12.6503	-0.0999719	-0.110101	G1	Normal	2220	0
178	2265	Normal	Prostate																			HN28_P5_C08_S224_comb	0.402596	0.440145	0.150559	13.9266	-0.13282	-0.0872323	G1	Normal	3615	0
1780	6224	Normal	Prostate																			HN28_P5_C09_S225_comb	0.26925	0.298601	0.123591	12.8231	-0.13004	-0.137784	G1	Normal	2351	0
1781	1609	Normal	Prostate																			HN28_P5_C10_S226_comb	0.267537	0.362217	0.122417	12.0293	-0.150798	-0.138601	G1	Normal	3495	0
1782	4200	Normal	Prostate																			HN28_P5_D02_S230_comb	0.256377	0.304956	0.116039	11.8116	-0.177767	-0.112722	G1	Normal	2968	0
1783	3035	Normal	Prostate																			HN28_P5_D04_S232_comb	0.390525	0.326558	0.139529	13.1097	-0.0946455	-0.0396018	G1	Normal	3208	0
1784	2389	Normal	Prostate																			HN28_P5_D06_S234_comb	0.353697	0.474866	0.139287	12.5727	-0.140744	-0.142119	G1	Normal	4945	0
1785	1032	Normal	Prostate																			HN28_P5_D07_S235_comb	0.381512	0.416849	0.137575	12.725	-0.0566416	-0.154165	G1	Normal	4567	0
1786	2011	Normal	Prostate																			HN28_P5_D11_S239_comb	0.3033	0.37529	0.122243	12.1147	-0.211667	-0.140518	G1	Normal	3692	0
1787	2795	Normal	Prostate																			HN28_P5_D12_S240_comb	0.430436	0.267123	0.153251	14.4896	-0.0626357	-0.110968	G1	Normal	2149	0
1788	2691	Normal	Prostate																			HN28_P5_E02_S242_comb	0.369796	0.421529	0.147241	13.1949	-0.00914262	-0.101085	G1	Normal	3808	0
1789	1481	Normal	Prostate																			HN28_P5_E03_S243_comb	0.415069	0.353977	0.142126	13.2342	-0.13024	-0.121879	G1	Normal	3814	0
1790	5918	Normal	Prostate																			HN28_P5_E04_S244_comb	0.357106	0.338818	0.131203	13.3356	-0.0521856	-0.0810176	G1	Normal	3074	0
1791	3728	Normal	Prostate																			HN28_P5_E05_S245_comb	0.270459	0.238777	0.122915	12.0061	-0.0204492	-0.140871	G1	Normal	2552	0
1792	3247	Normal	Prostate																			HN28_P5_E06_S246_comb	0.347418	0.297603	0.138074	12.8123	-0.0290698	-0.112555	G1	Normal	3114	0
1793	2669	Normal	Prostate																			HN28_P5_E07_S247_comb	0.38144	0.602014	0.136187	12.7055	-0.0677374	-0.054057	G1	Cancer	6201	2.2013
1794	2639	Normal	Prostate																			HN28_P5_E09_S249_comb	0.417398	0.359933	0.151634	13.6811	-0.0413586	-0.0507648	G1	Normal	3403	0
1795	2775	Normal	Prostate																			HN28_P5_E10_S250_comb	0.258526	0.416973	0.125563	12.1727	-0.193518	-0.153188	G1	Normal	4082	0
1796	1884	Normal	Prostate																			HN28_P5_E11_S251_comb	0.445591	0.402888	0.15412	14.0432	-0.0522648	-0.195303	G1	Normal	3819	0
1797	1410	Normal	Prostate																			HN28_P5_F06_S258_comb	0.300556	0.349238	0.116791	12.2817	-0.178164	-0.124332	G1	Normal	3410	0
1798	2192	Normal	Prostate																			HN28_P5_F07_S259_comb	0.356343	0.308569	0.130343	12.865	-0.108545	-0.162567	G1	Normal	3140	0
1799	2183	Normal	Prostate																			HN28_P5_F08_S260_comb	0.313956	0.324235	0.117549	12.136	-0.159456	-0.146636	G1	Normal	3227	0
18	1339	Normal	Prostate																			HN28_P5_F10_S262_comb	0.298853	0.576326	0.12562	11.9946	-0.178926	-0.113931	G1	Cancer	6083	0.020058
1800	1652	Normal	Prostate																			HN28_P5_F11_S263_comb	0.479112	0.793448	0.14485	13.6804	0.0281703	0.512493	G2M	Cancer	7244	2.6729
1801	2532	Normal	Prostate																			HN28_P5_F12_S264_comb	0.374953	0.512642	0.132341	12.8497	-0.0858614	-0.069379	G1	Cancer	5117	0
1802	2780	Normal	Prostate																			HN28_P5_G01_S265_comb	0.359237	0.361586	0.138217	12.8759	-0.155919	-0.0681053	G1	Normal	3419	0
1803	3099	Normal	Prostate																			HN28_P5_G02_S266_comb	0.343312	0.482779	0.137136	12.4554	-0.119486	-0.175968	G1	Normal	4803	0
1804	2548	Normal	Prostate																			HN28_P5_G05_S269_comb	0.357336	0.546571	0.136981	12.4583	-0.134723	-0.0495748	G1	Cancer	5759	0
1805	4318	Normal	Prostate																			HN28_P5_G07_S271_comb	0.388107	0.449962	0.144808	13.4902	-0.163348	-0.108544	G1	Normal	4069	0
1806	2466	Normal	Prostate																			HN28_P5_G12_S276_comb	0.277299	0.30392	0.124123	12.4857	-0.0844252	-0.0375168	G1	Normal	2687	0
1807	2943	Normal	Prostate																			HN28_P5_H02_S278_comb	0.280093	0.568876	0.126849	11.7281	-0.0215743	-0.123746	G1	Cancer	6312	0
1808	3118	Normal	Prostate																			HN28_P5_H03_S279_comb	0.38931	0.373924	0.142195	13.4658	-0.136003	-0.112111	G1	Normal	3597	0
1809	2403	Normal	Prostate																			HN28_P5_H04_S280_comb	0.456228	0.36651	0.154799	14.3464	-0.0474529	-0.18694	G1	Normal	3265	0
1810	3783	Normal	Prostate																			HN28_P5_H05_S281_comb	0.270951	0.297944	0.112653	11.6316	-0.124743	-0.13206	G1	Normal	3179	0
1811	2300	Normal	Prostate																			HN28_P5_H06_S282_comb	0.363343	0.304209	0.147265	13.7239	-0.0972079	-0.0877115	G1	Normal	2706	0
1812	2216	Normal	Prostate																			HN28_P5_H07_S283_comb	0.350582	0.285071	0.133369	13.1562	-0.0586028	-0.140767	G1	Normal	2567	0
1813	2914	Normal	Prostate																			HN28_P5_H09_S285_comb	0.314325	0.282202	0.131714	12.8769	-0.0385638	-0.163556	G1	Normal	2692	0.1635
1814	2496	Normal	Prostate																			HN28_P5_H10_S286_comb	0.354809	0.247803	0.132217	12.9531	-0.038894	-0.131907	G1	Normal	2378	0
1815	2083	Normal	Prostate																			HN28_P5_H11_S287_comb	0.356053	0.292958	0.137631	12.5086	-0.0831479	-0.0610682	G1	Normal	2675	0
1816	2642	Normal	Prostate																			HN28_P6_A02_S98_comb	0.375742	0.258667	0.132194	12.2978	-0.187293	-0.137343	G1	Normal	2946	0
1817	2942	Normal	Prostate																			HN28_P6_A03_S99_comb	0.276113	0.338397	0.115583	12.0685	-0.143065	-0.0748585	G1	Normal	3127	0
1818	3313	Normal	Prostate																			HN28_P6_A04_S100_comb	0.253651	0.321917	0.110811	11.5183	-0.140962	-0.116498	G1	Normal	3376	0
1819	2166	Normal	Prostate																			HN28_P6_A05_S101_comb	0.221766	0.267458	0.1081	10.7893	-0.0209408	-0.0712997	G1	Normal	3328	0
1820	2508	Normal	Prostate																			HN28_P6_A08_S104_comb	0.386902	0.228954	0.137838	13.0648	-0.0487125	-0.0824157	G1	Normal	2237	0
1821	2440	Normal	Prostate																			HN28_P6_A09_S105_comb	0.386776	0.329866	0.150848	13.8827	-0.191374	-0.0599944	G1	Normal	3043	0
1822	2446	Normal	Prostate																			HN28_P6_B03_S111_comb	0.414642	0.350355	0.148442	13.2574	-0.0705739	-0.0709879	G1	Normal	3321	0
1823	3583	Normal	Prostate																			HN28_P6_B06_S114_comb	0.279346	0.260436	0.109917	11.4842	-0.0842454	-0.073026	G1	Normal	2916	0
1824	2809	Normal	Prostate																			HN28_P6_B07_S115_comb	0.301993	0.311295	0.114244	11.7528	-0.13646	-0.124297	G1	Normal	3481	0
1825	2322	Normal	Prostate																			HN28_P6_B09_S117_comb	0.384091	0.321592	0.148185	13.8398	-0.142908	-0.083495	G1	Normal	2821	0
1826	2312	Normal	Prostate																			HN28_P6_B10_S118_comb	0.436044	0.238494	0.141358	13.6567	-0.051359	-0.110966	G1	Normal	2303	0
1827	2056	Normal	Prostate																			HN28_P6_B11_S119_comb	0.441383	0.240465	0.147289	14.1801	-0.158157	-0.0319894	G1	Normal	2042	0
1828	2865	Normal	Prostate																			HN28_P6_B12_S120_comb	0.267668	0.28972	0.112587	11.464	-0.050034	-0.0359914	G1	Normal	3451	0
1829	3068	Normal	Prostate																			HN28_P6_C01_S121_comb	0.338032	0.419154	0.135739	13.0987	-0.110474	-0.0623352	G1	Normal	3592	0
183	1283	Normal	Prostate																			HN28_P6_C02_S122_comb	0.335911	0.290069	0.126611	12.5714	-0.124856	-0.149691	G1	Normal	2948	0
1830	2971	Normal	Prostate																			HN28_P6_C05_S125_comb	0.31015	0.310154	0.127093	12.1242	-0.0834625	-0.150446	G1	Normal	2983	0
1831	2535	Normal	Prostate																			HN28_P6_C07_S127_comb	0.357357	0.32842	0.139185	12.85	-0.168729	-0.0419033	G1	Normal	3171	0
1832	2329	Normal	Prostate																			HN28_P6_C10_S130_comb	0.387476	0.331393	0.144034	13.5984	-0.0671718	-0.124402	G1	Normal	3132	0
1833	2647	Normal	Prostate																			HN28_P6_C11_S131_comb	0.390364	0.291954	0.145907	13.0174	-0.147376	-0.0809666	G1	Normal	3085	0
1834	2699	Normal	Prostate																			HN28_P6_D02_S134_comb	0.355318	0.281561	0.140574	12.3425	-0.0346795	-0.0314698	G1	Normal	3278	0
1835	2469	Normal	Prostate																			HN28_P6_D03_S135_comb	0.422558	0.272916	0.142807	13.1518	-0.13065	-0.122903	G1	Normal	2814	0
1836	2525	Normal	Prostate																			HN28_P6_D04_S136_comb	0.287727	0.24443	0.111232	11.8913	-0.132977	-0.109628	G1	Normal	2552	0
1837	2642	Normal	Prostate																			HN28_P6_D05_S137_comb	0.338321	0.283193	0.134935	12.7827	-0.00375581	-0.0806872	G1	Normal	2767	0
1838	2557	Normal	Prostate																			HN28_P6_D06_S138_comb	0.305793	0.41753	0.121864	12.1571	-0.151657	-0.163366	G1	Normal	4245	0
1839	2671	Normal	Prostate																			HN28_P6_D07_S139_comb	0.412979	0.439677	0.158154	13.9209	-0.116841	-0.0649132	G1	Normal	3607	0
1840	2066	Normal	Prostate																			HN28_P6_D08_S140_comb	0.308977	0.394913	0.131517	12.4436	-0.20073	-0.126537	G1	Normal	3645	0
1841	2556	Normal	Prostate																			HN28_P6_D09_S141_comb	0.384316	0.243904	0.142947	13.8126	-0.148662	-0.103402	G1	Normal	2198	0
1842	2774	Normal	Prostate																			HN28_P6_D10_S142_comb	0.406942	0.236149	0.144309	14.1168	-0.0314469	-0.142568	G1	Normal	2040	0
1843	2425	Normal	Prostate																			HN28_P6_D11_S143_comb	0.423493	0.41627	0.14969	13.5683	-0.0211302	-0.106367	G1	Normal	3870	0
1844	2444	Normal	Prostate																			HN28_P6_D12_S144_comb	0.267974	0.280636	0.11823	11.7595	-0.166284	-0.126965	G1	Normal	2894	0
1845	3187	Normal	Prostate																			HN28_P6_E02_S146_comb	0.370673	0.264472	0.137949	13.2136	-0.0927836	-0.0621982	G1	Normal	2459	0
1846	1857	Normal	Prostate																			HN28_P6_E04_S148_comb	0.329966	0.339052	0.129701	12.7327	-0.0839675	-0.122856	G1	Normal	3148	0
1847	2439	Normal	Prostate																			HN28_P6_E06_S150_comb	0.364265	0.45255	0.138048	13.1225	-0.125803	-0.113891	G1	Normal	4211	0
1848	2486	Normal	Prostate																			HN28_P6_E07_S151_comb	0.371019	0.289139	0.139026	13.5763	-0.0524981	-0.0260353	G1	Normal	2533	0
1849	3224	Normal	Prostate																			HN28_P6_E09_S153_comb	0.379412	0.330317	0.132785	12.6029	-0.128685	-0.0608837	G1	Normal	3520	0
185	1103	Normal	Prostate																			HN28_P6_E10_S154_comb	0.329666	0.312638	0.132257	12.5146	-0.0294538	-0.104891	G1	Normal	3317	0
1850	2513	Normal	Prostate																			HN28_P6_F01_S157_comb	0.238765	0.237475	0.116625	11.7452	-0.174315	-0.159069	G1	Normal	2077	0
1851	2040	Normal	Prostate																			HN28_P6_F03_S159_comb	0.341806	0.352659	0.132878	12.1294	-0.0975141	-0.059259	G1	Normal	3663	0
1852	2970	Normal	Prostate																			HN28_P6_F04_S160_comb	0.387697	0.304895	0.13997	13.3714	-0.131535	-0.103638	G1	Normal	2831	0
1853	2342	Normal	Prostate																			HN28_P6_F05_S161_comb	0.232429	0.2281	0.107995	11.0815	-0.0986278	-0.140331	G1	Normal	2601	0
1854	2857	Normal	Prostate																			HN28_P6_F06_S162_comb	0.262773	0.248154	0.116922	11.1646	-0.145403	-0.105013	G1	Normal	3104	0
1855	2671	Normal	Prostate																			HN28_P6_F08_S164_comb	0.320653	0.325766	0.130717	12.6757	-0.125232	-0.108283	G1	Normal	2821	0
1856	5534	Normal	Prostate																			HN28_P6_F09_S165_comb	0.445671	0.408293	0.153692	14.6587	-0.0533074	-0.0750835	G1	Normal	3177	0
1857	2216	Normal	Prostate																			HN28_P6_F10_S166_comb	0.394722	0.317431	0.143818	13.5477	-0.0154829	-0.130408	G1	Normal	2804	0
1858	3569	Normal	Prostate																			HN28_P6_F11_S167_comb	0.359047	0.264458	0.131553	12.7734	-0.00573484	-0.00331316	G1	Normal	2877	0
1859	2452	Normal	Prostate																			HN28_P6_F12_S168_comb	0.301039	0.320884	0.122149	11.9047	-0.115272	-0.132232	G1	Normal	3496	0
186	710	Normal	Prostate																			HN28_P6_G05_S173_comb	0.376317	0.300438	0.143358	13.4419	-0.0819983	-0.0818887	G1	Normal	2723	0
1860	2327	Normal	Prostate																			HN28_P6_G06_S174_comb	0.379025	0.373197	0.146037	13.2231	-0.010175	-0.0760549	G1	Normal	3537	0
1861	2322	Normal	Prostate																			HN28_P6_G08_S176_comb	0.299016	0.338756	0.115476	12.423	-0.0187484	-0.113396	G1	Normal	3296	0
1862	4057	Normal	Prostate																			HN28_P6_G09_S177_comb	0.389788	0.386359	0.150186	13.7548	-0.039099	-0.0823994	G1	Normal	3323	0
1863	2889	Normal	Prostate																			HN28_P6_G11_S179_comb	0.31976	0.336952	0.127706	12.5281	-0.0486438	-0.0945156	G1	Normal	3275	0
1864	2542	Normal	Prostate																			HN28_P6_H01_S181_comb	0.39402	0.278635	0.147822	13.1225	-0.152595	-0.16045	G1	Normal	2883	0
1865	3788	Normal	Prostate																			HN28_P6_H07_S187_comb	0.297713	0.241658	0.123379	11.7411	-0.0246661	-0.121283	G1	Normal	2580	0
1866	1925	Normal	Prostate																			HN28_P6_H09_S189_comb	0.241763	0.483281	0.115832	11.6319	-0.213383	-0.100066	G1	Cancer	4772	0
1867	2747	Normal	Prostate																			HN28_P6_H10_S190_comb	0.29255	0.224903	0.121445	11.7242	-0.0550827	-0.0663567	G1	Normal	2383	0
1868	2144	Normal	Prostate																			HN28_P6_H11_S191_comb	0.360745	0.235092	0.127706	12.4276	-0.0972768	-0.14848	G1	Normal	2404	0
1869	3173	Normal	Prostate																			HN28_P6_H12_S192_comb	0.302762	0.212728	0.121188	11.9284	-0.0360247	-0.0063311	G1	Normal	2346	0
1870	2442	Normal	Prostate																			HNSCC_17_P10_A01_S193_comb	0.38975	0.291485	0.143128	14.0483	-0.0107758	-0.0267976	G1	Normal	3020	0
1871	1836	Normal	Prostate																			HNSCC_17_P10_A02_S194_comb	0.400769	0.314312	0.152501	14.8112	-0.0540306	-0.0478792	G1	Normal	2875	0
1872	2745	Normal	Prostate																			HNSCC_17_P10_A09_S201_comb	0.472904	0.253274	0.157593	14.9311	-0.0921634	-0.0462233	G1	Normal	2697	0
1873	2042	Normal	Prostate																			HNSCC_17_P10_A12_S204_comb	0.327717	0.210048	0.128802	12.3858	-0.140832	-0.0299742	G1	Normal	3043	0
1874	4335	Normal	Prostate																			HNSCC_17_P10_B02_S206_comb	0.448109	0.280691	0.149611	14.3935	-0.0530757	-0.0898254	G1	Normal	2867	0
1875	2081	Normal	Prostate																			HNSCC_17_P10_B04_S208_comb	0.387818	0.164248	0.130839	12.8251	-0.0475095	-0.13149	G1	Normal	2573	0
1876	2694	Normal	Prostate																			HNSCC_17_P10_B11_S215_comb	0.393067	0.272788	0.15248	14.1034	-0.121175	-0.0227093	G1	Normal	3161	0
1877	2934	Normal	Prostate																			HNSCC_17_P10_C01_S217_comb	0.336144	0.242944	0.129908	12.743	-0.105037	-0.0573084	G1	Normal	3103	0
1878	3461	Normal	Prostate																			HNSCC_17_P10_C03_S219_comb	0.348566	0.216684	0.136702	13.4056	-0.0969315	-0.08456	G1	Normal	2739	0
1879	3633	Normal	Prostate																			HNSCC_17_P10_C05_S221_comb	0.382597	0.69998	0.137648	13.1212	-0.0192385	-0.0931697	G1	Normal	3095	0
1880	2437	Normal	Prostate																			HNSCC_17_P10_C06_S222_comb	0.384693	0.239094	0.141905	13.4312	-0.163393	-0.0662423	G1	Normal	3095	0
1881	3978	Normal	Prostate																			HNSCC_17_P10_C07_S223_comb	0.29146	0.250156	0.131718	12.5603	-0.0387356	-0.135424	G1	Normal	3120	0
1882	2992	Normal	Prostate																			HNSCC_17_P10_D02_S230_comb	0.493209	0.247585	0.165965	15.9654	-0.0370113	-0.0305846	G1	Normal	2100	0
1883	1796	Normal	Prostate																			HNSCC_17_P10_D04_S232_comb	0.308841	0.184329	0.1281	12.3994	-0.147308	-0.0731177	G1	Normal	2992	0
1884	2372	Normal	Prostate																			HNSCC_17_P10_D06_S234_comb	0.450765	0.238183	0.152154	14.3287	-0.0704139	-0.0266887	G1	Normal	3076	0
1885	3790	Normal	Prostate																			HNSCC_17_P10_D11_S239_comb	0.34146	0.255527	0.139397	13.4685	-0.0974411	-0.129798	G1	Normal	3013	0
1886	2415	Normal	Prostate																			HNSCC_17_P10_E03_S243_comb	0.356688	0.230497	0.136697	12.9545	-0.0106209	-0.00811934	G1	Normal	3067	0
1887	3607	Normal	Prostate																			HNSCC_17_P10_E04_S244_comb	0.339941	0.446055	0.134874	12.792	-0.0500856	-0.0663331	G1	Normal	3074	0
1888	2091	Normal	Prostate																			HNSCC_17_P10_E05_S245_comb	0.332901	0.259019	0.141434	13.7344	-0.0329948	-0.0585449	G1	Normal	3100	0
1889	2115	Normal	Prostate																			HNSCC_17_P10_E06_S246_comb	0.284268	0.220162	0.121849	12.0456	-0.012278	-0.000336654	G1	Normal	2626	0
1890	3008	Normal	Prostate																			HNSCC_17_P10_E07_S247_comb	0.290671	0.224571	0.122411	11.4358	-0.0655005	-9.68798e-05	G1	Normal	3278	0
1891	2027	Normal	Prostate																			HNSCC_17_P10_E08_S248_comb	0.381266	0.250492	0.133853	13.0857	-0.0339084	-0.0271903	G1	Normal	3118	0
1892	4172	Normal	Prostate																			HNSCC_17_P10_E09_S249_comb	0.346021	0.350102	0.147322	13.3518	-0.0304646	-0.0412597	G1	Normal	2965	0
1893	2938	Normal	Prostate																			HNSCC_17_P10_F05_S257_comb	0.306289	0.217178	0.123962	12.1241	-0.0937084	-0.0141413	G1	Normal	2896	0
1894	3065	Normal	Prostate																			HNSCC_17_P10_F06_S258_comb	0.319172	0.228219	0.13138	12.5242	-0.0631234	-0.00877442	G1	Normal	3091	0
1895	3021	Normal	Prostate																			HNSCC_17_P10_F09_S261_comb	0.382597	0.304981	0.135248	13.507	-0.0716026	-0.0197273	G1	Normal	2520	0
1896	3013	Normal	Prostate																			HNSCC_17_P10_F10_S262_comb	0.377196	0.614154	0.158998	15.2513	-0.100249	-0.0152765	G1	Normal	3002	0
1897	1037	Normal	Prostate																			HNSCC_17_P10_G03_S267_comb	0.418789	0.268065	0.138595	13.5052	-0.113122	-0.0461448	G1	Normal	3075	0
1898	3140	Normal	Prostate																			HNSCC_17_P10_G04_S268_comb	0.291917	0.535801	0.123828	11.9199	-0.0831766	-0.0133353	G1	Normal	3075	0
1899	3894	Normal	Prostate																			HNSCC_17_P10_G07_S271_comb	0.411378	0.173274	0.140718	13.8628	-0.129926	-0.0492822	G1	Normal	2458	0
19	1751	Normal	Prostate																			HNSCC_17_P10_G08_S272_comb	0.315641	0.232323	0.134254	13.4018	-0.124461	-0.0272977	G1	Normal	2725	0
1900	4416	Normal	Prostate																			HNSCC_17_P10_H03_S279_comb	0.399419	0.294121	0.154777	14.7813	-0.00424283	-0.0552342	G1	Normal	3147	0
1901	2419	Normal	Prostate																			HNSCC_17_P10_H04_S280_comb	0.376126	0.265619	0.147858	14.0498	-0.0818436	-0.0397727	G1	Normal	3267	0
1902	2397	Normal	Prostate																			HNSCC_17_P10_H08_S284_comb	0.322741	0.306394	0.144508	13.8417	-0.0626361	-0.0353424	G1	Normal	3332	0
1903	3305	Normal	Prostate																			HNSCC_17_P10_H10_S286_comb	0.355057	0.232138	0.141141	13.6606	-0.0376278	-0.0173137	G1	Normal	2520	0
1904	2369	Normal	Prostate																			HNSCC_17_P9_A08_S8_comb	0.331176	0.267158	0.140373	13.3991	-0.088626	-0.0584506	G1	Normal	3244	0
1905	2683	Normal	Prostate																			HNSCC_17_P9_A10_S10_comb	0.274102	0.264894	0.124796	12.0315	-0.0871905	-0.0582482	G1	Normal	2333	0
1906	2685	Normal	Prostate																			HNSCC_17_P9_B05_S17_comb	0.380254	0.248601	0.148769	13.9722	-0.0393731	-0.128342	G1	Normal	3108	0
1907	4832	Normal	Prostate																			HNSCC_17_P9_B07_S19_comb	0.403674	0.204342	0.150723	13.9392	-0.0504606	-0.0894968	G1	Normal	3338	0
1908	4773	Normal	Prostate																			HNSCC_17_P9_B09_S21_comb	0.358694	0.264602	0.131964	12.5963	-0.0633043	-0.0790123	G1	Normal	3383	0
1909	2405	Normal	Prostate																			HNSCC_17_P9_B12_S24_comb	0.381082	0.275175	0.144593	13.8927	-0.024051	-0.0589528	G1	Normal	2830	0
1910	3851	Normal	Prostate																			HNSCC_17_P9_C06_S30_comb	0.357889	0.322141	0.149835	14.4156	-0.0488122	-0.0724606	G1	Normal	3536	0
1911	3174	Normal	Prostate																			HNSCC_17_P9_C07_S31_comb	0.256918	0.223468	0.115599	11.5691	-0.0708883	-0.118751	G1	Normal	3336	0
1912	3652	Normal	Prostate																			HNSCC_17_P9_C08_S32_comb	0.455309	0.244964	0.144635	14.4232	-0.0368873	-0.0200151	G1	Normal	3414	0
1913	2862	Normal	Prostate																			HNSCC_17_P9_C11_S35_comb	0.332389	0.224168	0.130346	12.7698	-0.0551426	-0.061416	G1	Normal	3042	0
1914	875	Normal	Prostate																			HNSCC_17_P9_D01_S37_comb	0.33088	0.268771	0.131815	12.7178	-0.0488836	-0.0386917	G1	Normal	3123	0
1915	2458	Normal	Prostate																			HNSCC_17_P9_E01_S49_comb	0.387809	0.309695	0.132978	13.0277	-0.143899	-0.0478845	G1	Normal	3085	0
1916	1263	Normal	Prostate																			HNSCC_17_P9_E02_S50_comb	0.447987	0.366993	0.157055	14.7451	-0.0149887	-0.0151764	G1	Normal	3282	0
1917	2766	Normal	Prostate																			HNSCC_17_P9_E06_S54_comb	0.350957	0.262307	0.129594	12.4768	-0.0282451	-0.0422675	G1	Normal	3247	0
1918	4094	Normal	Prostate																			HNSCC_17_P9_E08_S56_comb	0.485096	0.337342	0.144405	14.2309	-0.0346121	-0.0700514	G1	Normal	3810	0
1919	4124	Normal	Prostate																			HNSCC_17_P9_E09_S57_comb	0.386874	0.265818	0.141218	13.5936	-0.0589783	-0.0938921	G1	Normal	3016	0
1920	3102	Normal	Prostate																			HNSCC_17_P9_E10_S58_comb	0.376991	0.285264	0.131568	12.9468	-0.0910957	-0.00210759	G1	Normal	3230	0
1921	3001	Normal	Prostate																			HNSCC_17_P9_F02_S62_comb	0.33697	0.394476	0.135272	13.0413	-0.122268	-0.0934794	G1	Normal	2735	0
1922	6264	Normal	Prostate																			HNSCC_17_P9_F06_S66_comb	0.336382	0.197508	0.121278	11.8447	-0.143661	-0.0974923	G1	Normal	2856	0
1923	2908	Normal	Prostate																			HNSCC_17_P9_F09_S69_comb	0.462059	0.559488	0.154937	14.9167	-0.0229107	-0.0378286	G1	Normal	2963	0
1924	2767	Normal	Prostate																			HNSCC_17_P9_F11_S71_comb	0.381797	0.261726	0.141408	13.7186	-0.0339954	-0.00809078	G1	Normal	3445	0
1925	2985	Normal	Prostate																			HNSCC_17_P9_G04_S76_comb	0.338223	0.449804	0.128124	12.5852	-0.0377187	-0.0754931	G1	Normal	3119	0
1926	2658	Normal	Prostate																			HNSCC_17_P9_G05_S77_comb	0.356607	0.236497	0.137027	13.2379	-0.0585554	-0.0231717	G1	Normal	2878	0
1927	2625	Normal	Prostate																			HNSCC_17_P9_G07_S79_comb	0.401479	0.225669	0.1512	14.7649	-0.0544799	-0.0253594	G1	Normal	2663	0
1928	3546	Normal	Prostate																			HNSCC_17_P9_G09_S81_comb	0.365714	0.230637	0.147321	13.8166	-0.0464034	-0.0297649	G1	Normal	3124	0
1929	3274	Normal	Prostate																			HNSCC_17_P9_H01_S85_comb	0.403791	0.229203	0.145913	13.652	-0.0227921	-0.083163	G1	Normal	3017	0
1930	3644	Normal	Prostate																			HNSCC_17_P9_H04_S88_comb	0.330411	0.381419	0.129851	12.4504	-0.0842628	-0.0616041	G1	Normal	3268	0
1931	3805	Normal	Prostate																			HNSCC_17_P9_H06_S90_comb	0.379879	0.271496	0.155458	14.8061	-0.0315495	-0.128504	G1	Normal	2871	0
1932	2513	Normal	Prostate																			HNSCC_17_P9_H08_S92_comb	0.351036	0.207374	0.127713	12.8307	-0.0229803	-0.163105	G1	Normal	2409	0
1933	3708	Normal	Prostate																			HNSCC_17_P9_H11_S95_comb	0.37674	0.271747	0.147415	13.6991	-0.0824953	-0.0114563	G1	Normal	3328	0
1934	2386	Normal	Prostate																			HNSCC_17_P9_H12_S96_comb	0.454743	0.249843	0.148516	14.1687	-0.0500879	-0.083281	G1	Normal	3058	0
1935	3791	Normal	Prostate																			HNSCC_combo1_HNSCC_ComboP1_A02	0.393053	0.276457	0.144979	14.0945	-0.120933	-0.163748	G1	Normal	3155	0
1936	3261	Normal	Prostate																			HNSCC_combo1_HNSCC_ComboP1_A03	0.399014	0.292123	0.140378	13.1968	-0.0961774	-0.149659	G1	Normal	3258	0
1937	2931	Normal	Prostate																			HNSCC_combo1_HNSCC_ComboP1_A04	0.388057	0.271966	0.138485	13.7212	-0.0564423	-0.0262852	G1	Normal	3363	0
1938	2423	Normal	Prostate																			HNSCC_combo1_HNSCC_ComboP1_A06	0.401597	0.194514	0.13745	13.7896	-0.061402	-0.0226363	G1	Normal	3013	0
1939	2594	Normal	Prostate																			HNSCC_combo1_HNSCC_ComboP1_A11	0.339062	0.229417	0.147975	13.9754	-0.0329883	-0.0874146	G1	Normal	3984	0
1940	2830	Normal	Prostate																			HNSCC_combo1_HNSCC_ComboP1_B01	0.444557	0.89663	0.155463	14.4361	-0.134964	-0.0816139	G1	Normal	2981	0
1941	3008	Normal	Prostate																			HNSCC_combo1_HNSCC_ComboP1_B03	0.544485	0.19752	0.156673	14.1443	0.539191	0.0793612	S	Cancer	7927	1.5326
1942	4253	Normal	Prostate																			HNSCC_combo1_HNSCC_ComboP1_B07	0.381252	0.213018	0.137238	13.1452	-0.111743	-0.0505491	G1	Normal	2585	0
1943	2371	Normal	Prostate																			HNSCC_combo1_HNSCC_ComboP1_B08	0.366709	0.214442	0.128151	12.365	-0.0566325	-0.135699	G1	Cancer	6585	0
1944	4102	Normal	Prostate																			HNSCC_combo1_HNSCC_ComboP1_B09	0.353711	0.193229	0.135215	13.1193	-0.0489749	-0.0202782	G1	Normal	2679	0
1945	3076	Normal	Prostate																			HNSCC_combo1_HNSCC_ComboP1_C02	0.387373	0.359546	0.141432	13.1157	-0.122619	-0.0388812	G1	Normal	3923	0
1946	2730	Normal	Prostate																			HNSCC_combo1_HNSCC_ComboP1_C04	0.341147	0.377696	0.125708	12.2536	-0.112378	-0.0776787	G1	Cancer	5774	0
1947	2796	Normal	Prostate																			HNSCC_combo1_HNSCC_ComboP1_C05	0.429026	0.286166	0.141515	13.8415	0.0864503	0.540994	G2M	Cancer	5482	2.0176
1948	2666	Normal	Prostate																			HNSCC_combo1_HNSCC_ComboP1_C06	0.544791	0.641675	0.168946	14.9301	0.115359	0.690861	G2M	Cancer	6413	2.2863
1949	2456	Normal	Prostate																			HNSCC_combo1_HNSCC_ComboP1_C11	0.362836	0.329782	0.141815	13.1079	-0.0936582	-0.0163926	G1	Normal	3400	0
1952	585	Normal	Prostate																			HNSCC_combo1_HNSCC_ComboP1_C12	0.38776	0.392933	0.129858	13.1669	-0.0843911	-0.11802	G1	Normal	3364	0
1954	1485	Normal	Prostate																			HNSCC_combo1_HNSCC_ComboP1_D03	0.400243	0.712977	0.153463	12.9592	-0.144867	-0.161889	G1	Cancer	5576	0
1955	606	Normal	Prostate																			HNSCC_combo1_HNSCC_ComboP1_D05	0.426943	0.514725	0.144798	13.9066	-0.146041	-0.0754422	G1	Normal	2872	0
1956	2719	Normal	Prostate																			HNSCC_combo1_HNSCC_ComboP1_D06	0.347952	0.223804	0.140752	13.1727	-0.0568307	-0.137425	G1	Cancer	4640	0
1957	565	Normal	Prostate																			HNSCC_combo1_HNSCC_ComboP1_D08	0.282029	0.2486	0.118694	12.3951	-0.0499426	-0.0970977	G1	Cancer	2960	0
1958	768	Normal	Prostate																			HNSCC_combo1_HNSCC_ComboP1_D09	0.316502	0.550691	0.128598	12.3846	-0.00682819	-0.0796724	G1	Normal	2792	0
1959	5723	Normal	Prostate																			HNSCC_combo1_HNSCC_ComboP1_E02	0.391002	0.594768	0.131827	12.7079	-0.167784	-0.12403	G1	Normal	2636	0
1960	679	Normal	Prostate																			HNSCC_combo1_HNSCC_ComboP1_E03	0.461062	0.281283	0.159581	15.137	-0.116696	-0.0238252	G1	Normal	2920	0
1961	696	Normal	Prostate																			HNSCC_combo1_HNSCC_ComboP1_E06	0.426701	0.288986	0.144235	13.5383	-0.111544	-0.0611603	G1	Normal	3807	0
1962	546	Normal	Prostate																			HNSCC_combo1_HNSCC_ComboP1_E08	0.367828	0.748054	0.128049	12.5216	-0.135447	-0.109937	G1	Cancer	5189	0
1963	596	Normal	Prostate																			HNSCC_combo1_HNSCC_ComboP1_E10	0.464381	0.340901	0.154136	14.9096	-0.0228113	-0.0178891	G1	Normal	3463	0
1964	2112	Normal	Prostate																			HNSCC_combo1_HNSCC_ComboP1_F02	0.278934	0.531603	0.12447	11.7513	-0.122876	-0.147435	G1	Normal	2753	0
1965	604	Normal	Prostate																			HNSCC_combo1_HNSCC_ComboP1_F03	0.479267	0.227104	0.152618	15.2703	-0.0624003	-0.0966245	G1	Normal	3623	0
1966	2749	Normal	Prostate																			HNSCC_combo1_HNSCC_ComboP1_F04	0.400135	0.245636	0.134591	12.7916	-0.0178614	-0.0441012	G1	Cancer	5727	0
1967	521	Normal	Prostate																			HNSCC_combo1_HNSCC_ComboP1_F07	0.383886	0.580246	0.139092	13.0356	-0.0232721	-0.0626777	G1	Normal	3482	0
1968	514	Normal	Prostate																			HNSCC_combo1_HNSCC_ComboP1_F10	0.294807	0.249456	0.12597	12.1607	-0.0557908	-0.0401782	G1	Normal	2774	0
1969	3294	Normal	Prostate																			HNSCC_combo1_HNSCC_ComboP1_F12	0.361068	0.294234	0.131587	12.8874	-0.0375401	-0.0721988	G1	Normal	2105	0
1970	3356	Normal	Prostate																			HNSCC_combo1_HNSCC_ComboP1_G05	0.361639	0.545965	0.137597	13.2629	-0.0813979	-0.118787	G1	Normal	2825	0
1971	2663	Normal	Prostate																			HNSCC_combo1_HNSCC_ComboP1_G07	0.313541	0.272491	0.12475	11.7979	-0.106885	-0.0576165	G1	Normal	3251	0
1972	1135	Normal	Prostate																			HNSCC_combo1_HNSCC_ComboP1_G10	0.354116	0.267228	0.119907	12.3649	-0.142003	-0.08969	G1	Normal	5158	0.37295
1973	7027	Normal	Prostate																			HNSCC_combo1_HNSCC_ComboP1_H01	0.311846	0.319168	0.127849	12.0971	-0.0510768	-0.124557	G1	Normal	4466	0
1974	535	Normal	Prostate																			HNSCC_combo2_HNSCC_ComboP2_A03	0.423308	0.409347	0.147903	14.3714	-0.128776	-0.0354036	G1	Normal	2956	0
1975	1130	Normal	Prostate																			HNSCC_combo2_HNSCC_ComboP2_A04	0.324444	0.38721	0.132021	12.5741	-0.131315	-0.0865764	G1	Normal	3991	0
1976	748	Normal	Prostate																			HNSCC_combo2_HNSCC_ComboP2_A05	0.412821	0.247296	0.142584	13.7201	-0.0211395	-0.119006	G1	Normal	2657	0
1977	813	Normal	Prostate																			HNSCC_combo2_HNSCC_ComboP2_A06	0.387726	0.415187	0.142626	13.4986	-0.0748831	-0.111221	G1	Normal	3999	0
1978	1956	Normal	Prostate																			HNSCC_combo2_HNSCC_ComboP2_A07	0.328458	0.226827	0.115834	12.1113	-0.0676796	-0.027253	G1	Normal	2889	0
1979	808	Normal	Prostate																			HNSCC_combo2_HNSCC_ComboP2_A08	0.310061	0.401763	0.138111	13.2728	-0.0503955	-0.0820752	G1	Normal	3126	0
1980	742	Normal	Prostate																			HNSCC_combo2_HNSCC_ComboP2_A09	0.333782	0.255126	0.136156	13.2446	-0.00499164	-0.0204358	G1	Normal	2608	0
1981	4046	Normal	Prostate																			HNSCC_combo2_HNSCC_ComboP2_B02	0.358911	0.208797	0.128161	12.3269	-0.0870925	-0.0470393	G1	Normal	2495	0
1982	725	Normal	Prostate																			HNSCC_combo2_HNSCC_ComboP2_B05	0.293905	0.332795	0.125311	12.7559	-0.0941013	-0.11357	G1	Normal	2047	0
1983	832	Normal	Prostate																			HNSCC_combo2_HNSCC_ComboP2_B06	0.365387	0.290583	0.134141	12.703	-0.107622	-0.144504	G1	Normal	2494	0
1984	4443	Normal	Prostate																			HNSCC_combo2_HNSCC_ComboP2_C04	0.302569	0.256365	0.127576	12.3848	-0.0973036	-0.0527406	G1	Normal	2625	0
1985	4510	Normal	Prostate																			HNSCC_combo2_HNSCC_ComboP2_C05	0.273366	0.356228	0.111205	11.3015	-0.112983	-0.104609	G1	Normal	2220	0
1986	632	Normal	Prostate																			HNSCC_combo2_HNSCC_ComboP2_C10	0.331712	0.193982	0.128327	12.1807	-0.161327	-0.177732	G1	Normal	3919	0
1987	648	Normal	Prostate																			HNSCC_combo2_HNSCC_ComboP2_D01	0.415803	0.248938	0.14261	13.813	-0.110073	-0.0320873	G1	Normal	2105	0
1988	1085	Normal	Prostate																			HNSCC_combo2_HNSCC_ComboP2_D02	0.36078	0.232106	0.142707	13.5006	-0.106843	-0.131393	G1	Normal	3007	0
1989	3555	Normal	Prostate																			HNSCC_combo2_HNSCC_ComboP2_D04	0.273748	0.282499	0.11351	11.3679	-0.122966	-0.0595885	G1	Normal	2316	0
1990	638	Normal	Prostate																			HNSCC_combo2_HNSCC_ComboP2_D07	0.475688	0.289274	0.155301	14.2915	-0.0908743	-0.128495	G1	Normal	2722	0
1991	4060	Normal	Prostate																			HNSCC_combo2_HNSCC_ComboP2_E01	0.337051	0.211275	0.133777	13.1477	-0.046654	-0.0532403	G1	Normal	3496	0
1992	942	Normal	Prostate																			HNSCC_combo2_HNSCC_ComboP2_E02	0.421454	0.376399	0.151246	14.3798	-0.036638	-0.00188527	G1	Normal	2811	0
1993	615	Normal	Prostate																			HNSCC_combo2_HNSCC_ComboP2_E04	0.363627	0.227847	0.147545	14.2026	-0.0454839	-0.0882841	G1	Normal	2859	0
1994	904	Normal	Prostate																			HNSCC_combo2_HNSCC_ComboP2_E05	0.277446	0.357992	0.119336	11.986	-0.0644514	-0.0326805	G1	Normal	2141	0
1995	1048	Normal	Prostate																			HNSCC_combo2_HNSCC_ComboP2_E07	0.382138	0.279359	0.134782	12.8789	-0.143955	-0.13265	G1	Normal	2066	0
1996	923	Normal	Prostate																			HNSCC_combo2_HNSCC_ComboP2_F07	0.354668	0.337819	0.123932	12.5226	-0.106891	-0.13603	G1	Normal	3882	0
1997	953	Normal	Prostate																			HNSCC_combo2_HNSCC_ComboP2_F08	0.317525	0.204977	0.136453	13.1798	-0.112405	-0.147211	G1	Normal	2954	0
1998	1513	Normal	Prostate																			HNSCC_combo2_HNSCC_ComboP2_G01	0.411505	0.22259	0.143878	14.1451	-0.0847059	-0.0857908	G1	Normal	2855	0
1999	1018	Normal	Prostate																			HNSCC_combo2_HNSCC_ComboP2_G06	0.343238	0.220749	0.130709	12.5389	-0.180781	-0.115222	G1	Normal	4160	0
20	1400	Normal	Prostate																			HNSCC_combo2_HNSCC_ComboP2_G07	0.264406	0.252411	0.110837	11.5432	-0.0171397	-0.0854601	G1	Normal	2389	0
2000	3902	Normal	Prostate																			HNSCC_combo2_HNSCC_ComboP2_H02	0.344926	0.304741	0.130166	12.5609	-0.107366	-0.084905	G1	Normal	2971	0
2001	2817	Normal	Prostate																			HNSCC_combo2_HNSCC_ComboP2_H06	0.361392	0.306771	0.128627	13.4217	-0.080257	-0.143229	G1	Normal	3003	0
2002	2814	Normal	Prostate																			HNSCC_combo2_HNSCC_ComboP2_H08	0.405197	0.312821	0.144452	14.2055	-0.036531	-0.0892716	G1	Normal	2898	0
2003	2336	Normal	Prostate																			HNSCC10_p1_HNSCC10_P1_A01	0.324222	0.336208	0.123151	11.9461	-0.146545	-0.125296	G1	Normal	4373	0
2004	3418	Normal	Prostate																			HNSCC10_p1_HNSCC10_P1_A03	0.40144	0.316735	0.139019	13.1308	-0.0913903	-0.0015315	G1	Normal	3918	0
2005	2503	Normal	Prostate																			HNSCC10_p1_HNSCC10_P1_A05	0.235334	0.374384	0.104745	11.1629	-0.0316374	-0.150223	G1	Normal	2427	0
2006	1068	Normal	Prostate																			HNSCC10_p1_HNSCC10_P1_B05	0.305529	0.17469	0.123938	11.3166	-0.0909198	-0.123763	G1	Normal	4957	0
2007	2051	Normal	Prostate																			HNSCC10_p1_HNSCC10_P1_B07	0.332911	0.174581	0.127543	12.3293	-0.178814	-0.140615	G1	Normal	4532	0
2008	1018	Normal	Prostate																			HNSCC10_p1_HNSCC10_P1_B08	0.353023	0.309008	0.129257	13.1178	-0.109996	-0.134869	G1	Normal	4079	0
2009	2831	Normal	Prostate																			HNSCC10_p1_HNSCC10_P1_B09	0.386214	0.360084	0.135184	13.3221	-0.17256	-0.127736	G1	Normal	4095	0
2010	2353	Normal	Prostate																			HNSCC10_p1_HNSCC10_P1_C05	0.312588	0.318621	0.111614	11.6402	-0.127785	-0.102147	G1	Normal	4525	0
2011	1975	Normal	Prostate																			HNSCC10_p1_HNSCC10_P1_C06	0.343058	0.255959	0.119258	11.8158	-0.0557311	-0.0757174	G1	Normal	2668	0
2012	3365	Normal	Prostate																			HNSCC10_p1_HNSCC10_P1_C12	0.355597	0.358379	0.136028	12.4783	-0.0984855	-0.12741	G1	Normal	4092	0
2013	2290	Normal	Prostate																			HNSCC10_p1_HNSCC10_P1_D01	0.291334	0.206611	0.125037	12.1318	-0.0773714	-0.149966	G1	Normal	3103	0
2014	539	Normal	Prostate																			HNSCC10_p1_HNSCC10_P1_D03	0.361512	0.335648	0.130292	12.3054	-0.134538	-0.074497	G1	Normal	4623	0
2015	2661	Normal	Prostate																			HNSCC10_p1_HNSCC10_P1_D04	0.325225	0.307393	0.124593	12.4282	-0.0124026	-0.0206674	G1	Normal	3893	0
2016	1403	Normal	Prostate																			HNSCC10_p1_HNSCC10_P1_D07	0.308258	0.20478	0.127095	13.4891	-0.0817673	-0.00162012	G1	Normal	2740	0
2017	3036	Normal	Prostate																			HNSCC10_p1_HNSCC10_P1_D09	0.344598	0.170327	0.11229	12.0756	-0.0976421	-0.102902	G1	Normal	3589	0
2018	3263	Normal	Prostate																			HNSCC10_p1_HNSCC10_P1_E04	0.268611	0.359334	0.113194	11.4041	-0.0866498	-0.117054	G1	Normal	3028	0
2019	2520	Normal	Prostate																			HNSCC10_p1_HNSCC10_P1_E05	0.351402	0.313003	0.135863	12.7778	-0.0891165	-0.0565827	G1	Normal	4446	0
2020	2390	Normal	Prostate																			HNSCC10_p1_HNSCC10_P1_E06	0.33071	0.342794	0.135512	12.9414	-0.0169563	-0.104316	G1	Normal	3274	0
2021	863	Normal	Prostate																			HNSCC10_p1_HNSCC10_P1_F02	0.308447	0.278596	0.116884	11.8905	-0.0725356	-0.119932	G1	Normal	3622	0
2022	769	Normal	Prostate																			HNSCC10_p1_HNSCC10_P1_F05	0.340021	0.207428	0.140104	13.6712	-0.0806152	-0.0733934	G1	Normal	3752	0
2023	1974	Normal	Prostate																			HNSCC10_p1_HNSCC10_P1_F06	0.143011	0.328668	0.0946174	9.45048	-0.0387895	-0.100526	G1	Normal	3232	0
2024	1080	Normal	Prostate																			HNSCC10_p1_HNSCC10_P1_F07	0.369533	0.145651	0.132077	12.7075	-0.111887	-0.171443	G1	Normal	4341	0
2025	3927	Normal	Prostate																			HNSCC10_p1_HNSCC10_P1_F08	0.390623	0.315604	0.13381	12.9476	-0.155675	-0.196764	G1	Normal	4308	0
2026	3553	Normal	Prostate																			HNSCC10_p1_HNSCC10_P1_F09	0.377848	0.269225	0.142626	13.6732	-0.0487273	-0.0278704	G1	Normal	3418	0
2027	1859	Normal	Prostate																			HNSCC10_p1_HNSCC10_P1_F10	0.353515	0.15633	0.135301	12.3954	-0.128297	-0.143506	G1	Normal	3801	0
2028	1032	Normal	Prostate																			HNSCC10_p1_HNSCC10_P1_G01	0.374721	0.154495	0.13185	12.3554	-0.0666739	-0.138957	G1	Normal	4440	0
2029	1054	Normal	Prostate																			HNSCC10_p1_HNSCC10_P1_G04	0.348528	0.327892	0.129362	12.716	-0.0842535	-0.203135	G1	Normal	4308	0
2030	919	Normal	Prostate																			HNSCC10_p1_HNSCC10_P1_G05	0.393885	0.359205	0.125681	12.4572	-0.0873598	-0.0663523	G1	Normal	2445	0
2031	916	Normal	Prostate																			HNSCC10_p1_HNSCC10_P1_G09	0.315611	0.484645	0.137597	13.0061	-0.0736592	-0.140156	G1	Normal	3706	0
2032	1335	Normal	Prostate																			HNSCC10_p1_HNSCC10_P1_G11	0.393809	0.217887	0.138642	13.3405	-0.111169	-0.099217	G1	Normal	3254	0
2033	1318	Normal	Prostate																			HNSCC10_p1_HNSCC10_P1_H08	0.236962	0.377319	0.111635	10.9186	-0.0949868	-0.0390377	G1	Normal	2396	0
2034	1154	Normal	Prostate																			HNSCC10_p14_HNSCC10_P14_A06	0.297293	0.224878	0.112495	11.0576	-0.0835591	-0.0341265	G1	Normal	2655	0
2035	639	Normal	Prostate																			HNSCC10_p14_HNSCC10_P14_A07	0.311141	0.316791	0.114408	11.2085	-0.0443903	-0.0652094	G1	Normal	2305	0
2036	808	Normal	Prostate																			HNSCC10_p14_HNSCC10_P14_B02	0.318363	0.204193	0.125467	12.2559	-0.021422	-0.146521	G1	Normal	2496	0
2037	813	Normal	Prostate																			HNSCC10_p14_HNSCC10_P14_B04	0.361872	0.192709	0.131617	12.9121	-0.0434947	-0.0664358	G1	Normal	2203	0
2038	2022	Normal	Prostate																			HNSCC10_p14_HNSCC10_P14_B06	0.373536	0.506863	0.130533	12.739	-0.0900064	-0.0614924	G1	Normal	2248	0
2039	2922	Normal	Prostate																			HNSCC10_p14_HNSCC10_P14_B08	0.369746	0.159832	0.130392	12.9065	-0.0465161	-0.0444114	G1	Normal	2285	0
2040	2162	Normal	Prostate																			HNSCC10_p14_HNSCC10_P14_B10	0.422388	0.200319	0.148936	14.5802	-0.0820644	-0.00795944	G1	Normal	2872	0
2041	1526	Normal	Prostate																			HNSCC10_p14_HNSCC10_P14_C07	0.408407	0.247534	0.15279	14.8135	-0.0284457	-0.0756727	G1	Normal	3104	0
2042	1919	Normal	Prostate																			HNSCC10_p14_HNSCC10_P14_D03	0.305902	0.226332	0.127837	12.9187	-0.0106332	-0.0512061	G1	Normal	2540	0
2043	2286	Normal	Prostate																			HNSCC10_p14_HNSCC10_P14_D07	0.367741	0.197943	0.132569	12.9945	-0.0794059	-0.0283432	G1	Normal	2856	0
2044	5576	Normal	Prostate																			HNSCC10_p14_HNSCC10_P14_D08	0.356598	0.241329	0.129566	12.413	-0.102559	-0.135738	G1	Normal	2448	0
2045	3755	Normal	Prostate																			HNSCC10_p14_HNSCC10_P14_D12	0.408562	0.158194	0.142951	14.106	-0.0346007	-0.0260787	G1	Normal	2699	0
2046	3573	Normal	Prostate																			HNSCC10_p14_HNSCC10_P14_E03	0.453221	0.172638	0.156679	14.451	-0.119792	-0.0485632	G1	Normal	3475	0
2047	1094	Normal	Prostate																			HNSCC10_p14_HNSCC10_P14_E07	0.330664	0.4406	0.132358	13.0614	-0.108626	-0.168216	G1	Normal	2781	0
2048	936	Normal	Prostate																			HNSCC10_p14_HNSCC10_P14_F02	0.299517	0.304031	0.125688	12.8974	-0.058474	-0.122814	G1	Normal	2110	0
2049	1097	Normal	Prostate																			HNSCC10_p14_HNSCC10_P14_F03	0.38276	0.1803	0.140206	13.5578	-0.100503	-0.0660098	G1	Normal	2175	0
2050	4614	Normal	Prostate																			HNSCC10_p14_HNSCC10_P14_F06	0.37861	0.184937	0.12807	12.4976	-0.0161485	-0.119632	G1	Normal	4112	0
2051	2463	Normal	Prostate																			HNSCC10_p14_HNSCC10_P14_F09	0.373179	0.198911	0.138366	12.9753	-0.0337478	-0.0781349	G1	Normal	3176	0
2052	1301	Normal	Prostate																			HNSCC10_p14_HNSCC10_P14_F10	0.215588	0.175819	0.122161	11.8116	-0.0678566	-0.0747043	G1	Normal	2599	0
2053	1086	Normal	Prostate																			HNSCC10_p14_HNSCC10_P14_G02	0.289408	0.371306	0.110611	10.984	-0.0814034	-0.103955	G1	Normal	2529	0
2054	705	Normal	Prostate																			HNSCC10_p14_HNSCC10_P14_G06	0.397471	0.259827	0.133483	13.2402	-0.0701558	-0.00991743	G1	Normal	2313	0
2055	2616	Normal	Prostate																			HNSCC10_p14_HNSCC10_P14_G08	0.369484	0.252001	0.137081	13.3931	-0.051648	-0.0795113	G1	Normal	2339	0
2056	1932	Normal	Prostate																			HNSCC10_p14_HNSCC10_P14_H04	0.397719	0.234144	0.134872	12.8175	-0.0911182	-0.0779116	G1	Normal	2364	0
2057	940	Normal	Prostate																			HNSCC10_p4_HNSCC10_P4_A01	0.311498	0.204549	0.132893	12.7675	-0.0824097	-0.0944245	G1	Normal	3583	0
2058	1049	Normal	Prostate																			HNSCC10_p4_HNSCC10_P4_A12	0.252905	0.274355	0.109379	10.9129	-0.125768	-0.0829237	G1	Normal	3054	0
2059	3985	Normal	Prostate																			HNSCC10_p4_HNSCC10_P4_C10	0.350309	0.253141	0.13404	12.9956	-0.017795	-0.0125964	G1	Normal	2742	0
2060	995	Normal	Prostate																			HNSCC10_p4_HNSCC10_P4_F12	0.311921	0.357731	0.125551	12.457	-0.0587535	-0.0426371	G1	Normal	2672	0
2061	878	Normal	Prostate																			HNSCC10_p4_HNSCC10_P4_G04	0.413443	0.237125	0.135848	13.1086	-0.132154	-0.154781	G1	Normal	5133	0
2062	1133	Normal	Prostate																			HNSCC10_p4_HNSCC10_P4_H10	0.256835	0.198731	0.110695	11.0857	-0.0433689	-0.144985	G1	Normal	3395	0
2063	1336	Normal	Prostate																			HNSCC10_p4_HNSCC10_P4_H12	0.25007	0.187792	0.110647	11.3246	-0.037148	-0.0673682	G1	Normal	2131	0
2064	925	Normal	Prostate																			HNSCC12_p11_HNSCC12_P11_E10	0.412016	0.593857	0.143593	13.6428	-0.0184019	-0.10065	G1	Normal	4126	0
2065	1129	Normal	Prostate																			HNSCC12_p11_HNSCC12_P11_F09	0.477241	0.447014	0.170327	14.8723	0.567821	0.0742445	S	Cancer	4893	0
2066	889	Normal	Prostate																			HNSCC12_p11_HNSCC12_P11_F12	0.603416	0.31993	0.200995	17.858	0.900696	0.28001	S	Cancer	3250	0
2067	2966	Normal	Prostate																			HNSCC12_p11_HNSCC12_P11_H12	0.363254	0.228547	0.132628	12.7521	-0.121729	-0.118504	G1	Cancer	2141	0
2068	2197	Normal	Prostate																			HNSCC12_p18_HNSCC12_P18_A07	0.369336	0.214256	0.141435	14.1844	-0.0957461	-0.0330683	G1	Normal	3007	0
2069	2290	Normal	Prostate																			HNSCC12_p18_HNSCC12_P18_B05	0.386032	0.245269	0.139863	13.6313	-0.0388974	-0.0571615	G1	Normal	2901	0
2070	1418	Normal	Prostate																			HNSCC12_p18_HNSCC12_P18_B07	0.415154	0.251766	0.152097	14.584	-0.0192907	-0.0601175	G1	Normal	3093	0
2071	2081	Normal	Prostate																			HNSCC12_p18_HNSCC12_P18_C04	0.321304	0.206064	0.137448	13.7441	-0.0997887	-0.0137222	G1	Normal	2910	0
2072	712	Normal	Prostate																			HNSCC12_p18_HNSCC12_P18_C05	0.355005	0.209071	0.138873	13.6361	-0.00231835	-0.0406402	G1	Normal	2833	0
2073	772	Normal	Prostate																			HNSCC12_p18_HNSCC12_P18_C08	0.403465	0.317023	0.139911	13.8573	-0.0696879	-0.0730014	G1	Normal	3876	0
2074	1302	Normal	Prostate																			HNSCC12_p18_HNSCC12_P18_C11	0.325166	0.23018	0.128014	13.5537	-0.0209899	-0.0796801	G1	Normal	2454	0
2075	861	Normal	Prostate																			HNSCC12_p18_HNSCC12_P18_D02	0.406736	0.211932	0.144959	13.8924	-0.00339032	-0.0332959	G1	Normal	2117	0
2076	943	Normal	Prostate																			HNSCC12_p18_HNSCC12_P18_D03	0.346008	0.213247	0.143248	14.4139	-0.0499253	-0.0352298	G1	Normal	2690	0
2077	4449	Normal	Prostate																			HNSCC12_p18_HNSCC12_P18_D04	0.404336	0.191983	0.143431	13.7689	-0.00156595	-0.0177065	G1	Normal	4158	0
2078	962	Normal	Prostate																			HNSCC12_p18_HNSCC12_P18_D10	0.430667	0.293256	0.156552	14.3549	-0.0539017	-0.0258745	G1	Normal	3703	0
2079	1846	Normal	Prostate																			HNSCC12_p18_HNSCC12_P18_E10	0.258333	0.172392	0.115289	11.9611	-0.137221	-0.121416	G1	Normal	3682	0
2080	872	Normal	Prostate																			HNSCC12_p18_HNSCC12_P18_E11	0.333054	0.208862	0.129177	13.0351	-0.0471728	-0.0575722	G1	Normal	2408	0
2081	896	Normal	Prostate																			HNSCC12_p18_HNSCC12_P18_F03	0.297411	0.205056	0.132689	13.038	-0.0745872	-0.0692926	G1	Normal	3283	0
2082	1520	Normal	Prostate																			HNSCC12_p18_HNSCC12_P18_F07	0.29358	0.239469	0.135415	13.2352	-0.131007	-0.0610304	G1	Normal	3080	0
2083	2404	Normal	Prostate																			HNSCC12_p18_HNSCC12_P18_F11	0.322341	0.172065	0.131822	12.8614	-0.142922	-0.146235	G1	Normal	3056	0
2084	1359	Normal	Prostate																			HNSCC12_p18_HNSCC12_P18_G05	0.354183	0.222909	0.136864	13.8099	-0.0293732	-0.115046	G1	Normal	2883	0
2085	868	Normal	Prostate																			HNSCC12_p18_HNSCC12_P18_G08	0.308002	0.144914	0.127335	13.6303	-0.028614	-0.0859245	G1	Normal	2587	0
2086	2277	Normal	Prostate																			HNSCC12_p18_HNSCC12_P18_H03	0.305575	0.329702	0.128411	12.6068	-0.0493563	-0.0286492	G1	Normal	2968	0
2087	1212	Normal	Prostate																			HNSCC12_p18_HNSCC12_P18_H07	0.372315	0.279903	0.12821	13.3153	-0.0407524	-0.0408443	G1	Normal	3956	0
2088	1095	Normal	Prostate																			HNSCC12_p19_HNSCC12_P19_A09	0.366138	0.235975	0.141806	13.8816	-0.0388288	-0.00123262	G1	Normal	3085	0
2089	1042	Normal	Prostate																			HNSCC12_p19_HNSCC12_P19_A11	0.32973	0.248745	0.136703	12.8052	-0.101324	-0.030266	G1	Normal	3314	0
2090	3376	Normal	Prostate																			HNSCC12_p19_HNSCC12_P19_B06	0.359484	0.207174	0.147491	13.7228	-0.109425	-0.0200281	G1	Normal	3560	0
2091	2444	Normal	Prostate																			HNSCC12_p19_HNSCC12_P19_B07	0.402543	0.249404	0.16674	15.4844	-0.0693518	-0.119092	G1	Normal	3442	0
2092	943	Normal	Prostate																			HNSCC12_p19_HNSCC12_P19_B09	0.265162	0.231129	0.135071	13.2104	-0.119248	-0.103582	G1	Normal	3150	0
2093	905	Normal	Prostate																			HNSCC12_p19_HNSCC12_P19_B12	0.370896	0.255551	0.146058	13.4684	-0.00656486	-0.116279	G1	Normal	2966	0
2094	1112	Normal	Prostate																			HNSCC12_p19_HNSCC12_P19_C09	0.396058	0.211149	0.14602	13.4449	-0.122614	-0.0736317	G1	Normal	3416	0
2095	799	Normal	Prostate																			HNSCC12_p19_HNSCC12_P19_D07	0.376326	0.248069	0.141284	13.2817	-0.0351831	-0.073638	G1	Normal	3073	0
2096	1270	Normal	Prostate																			HNSCC12_p19_HNSCC12_P19_E05	0.331387	0.229135	0.142909	13.1754	-0.161323	-0.0376883	G1	Normal	3676	0
2097	4078	Normal	Prostate																			HNSCC12_p19_HNSCC12_P19_E06	0.329143	0.236961	0.137431	13.1731	-0.135736	-0.064568	G1	Normal	3249	0
2098	1307	Normal	Prostate																			HNSCC12_p19_HNSCC12_P19_E10	0.348921	0.21911	0.148217	13.9001	-0.0677099	-0.061138	G1	Normal	3303	0
2099	787	Normal	Prostate																			HNSCC12_p19_HNSCC12_P19_F03	0.329348	0.226331	0.12739	12.4043	-0.0486797	-0.0578107	G1	Normal	3406	0
21	1442	Normal	Prostate																			HNSCC12_p19_HNSCC12_P19_F07	0.358792	0.357766	0.136926	12.8902	-0.102468	-0.0312359	G1	Normal	3266	0
2100	3419	Normal	Prostate																			HNSCC12_p19_HNSCC12_P19_G04	0.412343	0.253613	0.150125	14.3268	-0.0871031	-0.0734537	G1	Normal	3026	0
2101	2519	Normal	Prostate																			HNSCC12_p19_HNSCC12_P19_G07	0.373414	0.236454	0.139969	13.3668	-0.0564227	-0.0811306	G1	Normal	3857	0
2102	5286	Normal	Prostate																			HNSCC12_p19_HNSCC12_P19_H03	0.363674	0.191474	0.144152	13.5915	-0.0297542	-0.0349815	G1	Normal	3665	0
2103	2303	Normal	Prostate																			HNSCC12_p19_HNSCC12_P19_H07	0.335114	0.255836	0.141168	13.2903	-0.0793563	-0.000775807	G1	Normal	3715	0
2104	5681	Normal	Prostate																			HNSCC12_p19_HNSCC12_P19_H09	0.368101	0.211806	0.145817	13.6859	-0.0688185	-0.0836747	G1	Normal	3461	0
2105	1703	Normal	Prostate																			HNSCC12_p20_HNSCC12_P20_A01	0.326133	0.250925	0.133052	13.6012	-0.087512	-0.0530461	G1	Normal	2938	0
2106	4771	Normal	Prostate																			HNSCC12_p20_HNSCC12_P20_A02	0.317367	0.215412	0.133053	12.9654	-0.0738156	-0.0118468	G1	Normal	2914	0
2107	801	Normal	Prostate																			HNSCC12_p20_HNSCC12_P20_A05	0.334731	0.277321	0.135022	13.2337	-0.0361106	-0.0816747	G1	Normal	3203	0
2108	6077	Normal	Prostate																			HNSCC12_p20_HNSCC12_P20_B07	0.369542	0.224037	0.161504	14.7394	-0.0380371	-0.0835376	G1	Normal	4599	0
2109	5989	Normal	Prostate																			HNSCC12_p20_HNSCC12_P20_B08	0.348492	0.286684	0.148227	13.5997	-0.017072	-0.0636993	G1	Normal	4254	0
2110	3771	Normal	Prostate																			HNSCC12_p20_HNSCC12_P20_B11	0.380301	0.388203	0.151901	15.4821	-0.0706181	-0.0463114	G1	Normal	3003	0
2111	687	Normal	Prostate																			HNSCC12_p20_HNSCC12_P20_C08	0.31023	0.449671	0.129449	12.5095	-0.0908756	-0.012166	G1	Normal	4156	0
2112	4955	Normal	Prostate																			HNSCC12_p20_HNSCC12_P20_C12	0.344466	0.300461	0.138601	13.2669	-0.0678904	-0.0955028	G1	Normal	3204	0
2113	2090	Normal	Prostate																			HNSCC12_p20_HNSCC12_P20_D07	0.440473	0.243128	0.152672	14.3718	-0.0414682	-0.0402456	G1	Normal	4213	0
2114	5383	Normal	Prostate																			HNSCC12_p20_HNSCC12_P20_D11	0.37509	0.265534	0.146124	13.8218	-0.0521466	-0.0828373	G1	Normal	3298	0
2115	1714	Normal	Prostate																			HNSCC12_p20_HNSCC12_P20_E08	0.274539	0.281536	0.134628	12.9286	-0.0502118	-0.0510349	G1	Normal	3366	0
2116	5821	Normal	Prostate																			HNSCC12_p20_HNSCC12_P20_E10	0.409122	0.236981	0.148103	14.4178	-0.00290739	-0.0337619	G1	Normal	4136	0
2117	4570	Normal	Prostate																			HNSCC12_p20_HNSCC12_P20_E12	0.42251	0.305652	0.159933	14.7796	-0.0274442	-0.00881101	G1	Normal	3410	0
2118	2456	Normal	Prostate																			HNSCC12_p20_HNSCC12_P20_G04	0.405336	0.204086	0.143782	13.8742	-0.0460572	-0.0212967	G1	Normal	4069	0
2119	3043	Normal	Prostate																			HNSCC12_p20_HNSCC12_P20_G05	0.35211	0.345618	0.142936	13.3543	-0.0551817	-0.00725702	G1	Normal	3539	0
2120	4619	Normal	Prostate																			HNSCC12_p20_HNSCC12_P20_G11	0.274578	0.225282	0.12816	12.5609	-0.0461191	-0.0629357	G1	Normal	3979	0
2121	5923	Normal	Prostate																			HNSCC12_p20_HNSCC12_P20_G12	0.382703	0.234686	0.146954	13.6327	-0.00688492	-0.137007	G1	Normal	3037	0
2122	5157	Normal	Prostate																			HNSCC12_p20_HNSCC12_P20_H03	0.299235	0.357865	0.130613	13.2058	-0.0379734	-0.0664511	G1	Normal	2948	0
2123	3418	Normal	Prostate																			HNSCC12_p20_HNSCC12_P20_H08	0.262188	0.241379	0.137066	12.8632	-0.0544636	-0.063494	G1	Normal	3952	0
2124	531	Normal	Prostate																			HNSCC13_p1_HNSCC13_P1_B02	0.542336	0.353337	0.180482	15.0523	0.216396	0.65597	G2M	Cancer	6142	2.9951
2125	5316	Normal	Prostate																			HNSCC13_p1_HNSCC13_P1_B04	0.313704	0.593708	0.109607	11.8994	-0.186986	-0.105241	G1	Normal	3635	0
2126	4869	Normal	Prostate																			HNSCC13_p1_HNSCC13_P1_B05	0.31937	0.259689	0.118944	11.459	-0.152748	-0.131571	G1	Normal	4313	0
2127	6466	Normal	Prostate																			HNSCC13_p1_HNSCC13_P1_B09	0.394927	0.324121	0.154639	13.7278	-0.00222773	-0.0209154	G1	Normal	4541	0
2128	3985	Normal	Prostate																			HNSCC13_p1_HNSCC13_P1_B12	0.325119	0.21827	0.124469	11.8932	-0.146559	-0.125961	G1	Cancer	6036	0
2129	5340	Normal	Prostate																			HNSCC13_p1_HNSCC13_P1_D05	0.239382	0.348745	0.113725	11.4418	-0.167622	-0.1543	G1	Normal	4223	0
2130	5792	Normal	Prostate																			HNSCC13_p1_HNSCC13_P1_D10	0.270516	0.274736	0.112039	11.2471	-0.105765	-0.245129	G1	Normal	4179	0
2131	6018	Normal	Prostate																			HNSCC13_p1_HNSCC13_P1_D11	0.527448	0.717921	0.148162	13.726	0.549434	0.0697252	S	Cancer	8304	1.2845
2132	6142	Normal	Prostate																			HNSCC13_p1_HNSCC13_P1_E09	0.390445	0.535825	0.144568	13.7481	-0.11474	-0.121563	G1	Normal	4178	0
2133	6326	Normal	Prostate																			HNSCC13_p1_HNSCC13_P1_F08	0.271981	0.737861	0.116234	11.458	-0.159136	-0.171211	G1	Normal	2901	0
2134	5557	Normal	Prostate																			HNSCC13_p1_HNSCC13_P1_G05	0.428162	0.430837	0.162072	13.2146	-0.000342649	-0.0689676	G1	Cancer	6263	0
2135	5516	Normal	Prostate																			HNSCC13_p1_HNSCC13_P1_H12	0.338581	0.904217	0.134495	12.2846	-0.0501864	-0.077843	G1	Normal	4351	0
2136	5329	Normal	Prostate																			HNSCC13_p11_HNSCC13_P11_A03	0.369797	0.363808	0.134514	12.9476	-0.0361099	-0.0180218	G1	Normal	3094	0
2137	5659	Normal	Prostate																			HNSCC13_p11_HNSCC13_P11_B09	0.30827	0.303573	0.131367	12.8201	-0.0970144	-0.101765	G1	Normal	2919	0
2138	5767	Normal	Prostate																			HNSCC13_p11_HNSCC13_P11_C11	0.393327	0.2276	0.154741	14.7725	-0.0139126	-0.161248	G1	Normal	2862	0
2139	5684	Normal	Prostate																			HNSCC13_p11_HNSCC13_P11_D03	0.382254	0.167922	0.150959	14.2272	-0.103421	-0.0529946	G1	Normal	3017	0
2140	5709	Normal	Prostate																			HNSCC13_p11_HNSCC13_P11_D05	0.342527	0.23476	0.127964	12.6339	-0.173276	-0.031536	G1	Normal	5505	0.54201
2141	4473	Normal	Prostate																			HNSCC13_p11_HNSCC13_P11_F09	0.37572	0.229027	0.144035	12.7521	-0.0970428	-0.0911697	G1	Normal	4481	0
2142	1430	Normal	Prostate																			HNSCC13_p19_HNSCC13_P19_A04	0.344297	0.43869	0.134167	13.0422	-0.0894008	-0.110581	G1	Normal	3780	0
2143	880	Normal	Prostate																			HNSCC13_p19_HNSCC13_P19_A05	0.397905	0.363356	0.144495	14.0807	-0.0899709	-0.0291265	G1	Normal	3896	0
2144	2100	Normal	Prostate																			HNSCC13_p19_HNSCC13_P19_A06	0.380188	0.302343	0.13035	13.3444	-0.0264243	-0.0630676	G1	Normal	4207	0
2145	1169	Normal	Prostate																			HNSCC13_p19_HNSCC13_P19_A10	0.368641	0.485685	0.130329	13.2799	-0.0234449	-0.0910533	G1	Normal	3009	0
2146	1194	Normal	Prostate																			HNSCC13_p19_HNSCC13_P19_A11	0.274211	0.325253	0.123401	12.2007	-0.0802291	-0.089707	G1	Normal	3571	0
2147	893	Normal	Prostate																			HNSCC13_p19_HNSCC13_P19_B03	0.451355	0.423951	0.159536	14.4463	-0.000830723	-0.00561541	G1	Normal	3714	0
2148	980	Normal	Prostate																			HNSCC13_p19_HNSCC13_P19_B04	0.382847	0.380216	0.138232	13.2962	-0.116216	-0.107747	G1	Normal	3708	0
2149	2579	Normal	Prostate																			HNSCC13_p19_HNSCC13_P19_B06	0.37893	0.240023	0.137822	13.0849	-0.0748008	-0.0466025	G1	Normal	4489	0
2150	1378	Normal	Prostate																			HNSCC13_p19_HNSCC13_P19_B12	0.364449	0.263413	0.135955	11.7837	-0.270746	-0.143139	G1	Normal	6002	0
2151	1445	Normal	Prostate																			HNSCC13_p19_HNSCC13_P19_C08	0.373133	0.865977	0.129949	13.0198	-0.180045	-0.118145	G1	Normal	4137	0
2152	3164	Normal	Prostate																			HNSCC13_p19_HNSCC13_P19_C10	0.429633	0.298219	0.150835	14.4242	-0.105035	-0.1356	G1	Normal	2748	0
2153	2354	Normal	Prostate																			HNSCC13_p19_HNSCC13_P19_D03	0.309202	0.5795	0.118525	12.1804	-0.136226	-0.0891076	G1	Normal	4238	0
2154	3467	Normal	Prostate																			HNSCC13_p19_HNSCC13_P19_E06	0.592067	0.399685	0.187551	14.7824	0.290502	0.65102	G2M	Cancer	8001	1.9701
2155	890	Normal	Prostate																			HNSCC13_p19_HNSCC13_P19_E07	0.242529	0.344582	0.12159	11.0411	-0.0998634	-0.0658195	G1	Normal	3958	0
2156	2006	Normal	Prostate																			HNSCC13_p19_HNSCC13_P19_E08	0.382732	0.430033	0.137611	13.1594	-0.0542956	-0.00182644	G1	Normal	3488	0
2157	1048	Normal	Prostate																			HNSCC13_p19_HNSCC13_P19_E09	0.266413	0.373094	0.122358	11.9103	-0.0844292	-0.132337	G1	Normal	3116	0
2158	927	Normal	Prostate																			HNSCC13_p19_HNSCC13_P19_E10	0.348725	0.308857	0.148073	13.7297	-0.107691	-0.0186051	G1	Normal	3378	0
2159	1399	Normal	Prostate																			HNSCC13_p19_HNSCC13_P19_E12	0.34072	0.295371	0.141439	12.1871	-0.14829	-0.127278	G1	Normal	6034	0
2160	1241	Normal	Prostate																			HNSCC13_p19_HNSCC13_P19_F01	0.374405	0.438709	0.138231	13.5138	-0.133234	-0.0407573	G1	Normal	2646	0
2161	838	Normal	Prostate																			HNSCC13_p19_HNSCC13_P19_F03	0.276604	0.217173	0.123455	12.108	-0.0610597	-0.0518733	G1	Normal	2187	0
2162	1159	Normal	Prostate																			HNSCC13_p19_HNSCC13_P19_F05	0.314851	0.310963	0.118145	11.5786	-0.0770507	-0.0851256	G1	Normal	3698	0
2163	1234	Normal	Prostate																			HNSCC13_p19_HNSCC13_P19_F07	0.47388	0.270449	0.153299	15.0339	-0.101375	-0.114885	G1	Normal	3870	0
2164	2118	Normal	Prostate																			HNSCC13_p19_HNSCC13_P19_F09	0.312697	0.522723	0.129321	12.9062	-0.0702211	-0.103013	G1	Normal	2510	0
2165	2825	Normal	Prostate																			HNSCC13_p19_HNSCC13_P19_F12	0.370078	0.415185	0.135516	13.0678	-0.0736007	-0.0630997	G1	Normal	4571	0
2166	1320	Normal	Prostate																			HNSCC13_p19_HNSCC13_P19_G03	0.427787	0.311078	0.14299	13.7283	-0.146746	-0.0221382	G1	Normal	3235	0
2167	3240	Normal	Prostate																			HNSCC13_p19_HNSCC13_P19_G06	0.263414	0.23062	0.120089	11.7978	-0.0281303	-0.169338	G1	Normal	3022	0
2168	1290	Normal	Prostate																			HNSCC13_p19_HNSCC13_P19_G07	0.428339	0.314957	0.147148	13.7748	-0.1042	-0.00706383	G1	Normal	3656	0
2169	725	Normal	Prostate																			HNSCC13_p19_HNSCC13_P19_G09	0.249105	0.298819	0.117362	12.072	-0.138983	-0.108488	G1	Normal	2111	0
22	1261	Normal	Prostate																			HNSCC13_p19_HNSCC13_P19_H01	0.426717	0.399913	0.147583	14.0544	-0.0063803	-0.0395386	G1	Normal	3076	0
23	1539	Normal	Prostate																			HNSCC13_p19_HNSCC13_P19_H06	0.433215	0.136723	0.142436	13.877	-0.0914417	-0.0250972	G1	Normal	3292	0
24	1165	Normal	Prostate																			HNSCC13_p19_HNSCC13_P19_H10	0.394541	0.335718	0.127293	13.3247	-0.0111868	-0.0846857	G1	Normal	3705	0
25	1826	Normal	Prostate																			HNSCC13_p19_HNSCC13_P19_H11	0.328862	0.252661	0.122841	12.3994	-0.110527	-0.0643848	G1	Normal	3104	0
26	1650	Normal	Prostate																			HNSCC13_p19_HNSCC13_P19_H12	0.419762	0.386795	0.146959	14.1781	-0.0554153	-0.174882	G1	Normal	3817	0
27	1879	Normal	Prostate																			HNSCC16_P11_HNSCC16_P11_A01	0.433242	0.246445	0.136276	13.3955	-0.135136	-0.0657589	G1	Normal	3457	0
28	1810	Normal	Prostate																			HNSCC16_P11_HNSCC16_P11_A06	0.433427	0.445452	0.154769	14.4025	-0.0107249	-0.0484772	G1	Normal	2970	0
286	627	Normal	Prostate																			HNSCC16_P11_HNSCC16_P11_A10	0.399145	0.312915	0.148827	14.1633	-0.0593627	-0.0656013	G1	Normal	2865	0
29	1340	Normal	Prostate																			HNSCC16_P11_HNSCC16_P11_B02	0.322458	0.288417	0.116658	12.073	-0.125052	-0.12726	G1	Normal	3618	0
30	1682	Normal	Prostate																			HNSCC16_P11_HNSCC16_P11_B07	0.434141	0.185222	0.140565	14.026	-0.0198907	-0.0711911	G1	Normal	3834	0
31	1624	Normal	Prostate																			HNSCC16_P11_HNSCC16_P11_B08	0.392487	0.376401	0.138562	13.478	-0.0530238	-0.0575377	G1	Normal	3418	0
32	1351	Normal	Prostate																			HNSCC16_P11_HNSCC16_P11_B09	0.300547	0.351513	0.133884	12.7068	-0.0319841	-0.101274	G1	Normal	2749	0
33	1588	Normal	Prostate																			HNSCC16_P11_HNSCC16_P11_C04	0.378251	0.202742	0.1271	12.6665	-0.050458	-0.0729919	G1	Normal	3559	0
34	1360	Normal	Prostate																			HNSCC16_P11_HNSCC16_P11_C05	0.412928	0.324283	0.158231	14.8956	-0.101148	-0.0480123	G1	Normal	2936	0
35	1468	Normal	Prostate																			HNSCC16_P11_HNSCC16_P11_C06	0.358975	0.184721	0.136045	12.9239	-0.110116	-0.069948	G1	Normal	3044	0
36	1980	Normal	Prostate																			HNSCC16_P11_HNSCC16_P11_C07	0.347835	0.247494	0.14276	13.6882	-0.0991778	-0.112906	G1	Normal	2871	0
37	1527	Normal	Prostate																			HNSCC16_P11_HNSCC16_P11_C10	0.361895	0.256891	0.139717	13.1796	-0.0831347	-0.0568307	G1	Normal	3091	0
38	1461	Normal	Prostate																			HNSCC16_P11_HNSCC16_P11_C11	0.298357	0.359096	0.128955	12.5796	-0.114402	-0.0598239	G1	Normal	2466	0
39	1562	Normal	Prostate																			HNSCC16_P11_HNSCC16_P11_D04	0.321664	0.220868	0.130527	13.0458	-0.0777489	-0.0513674	G1	Normal	2315	0
4	2900	Normal	Prostate																			HNSCC16_P11_HNSCC16_P11_D07	0.373176	0.568152	0.12884	12.5438	-0.108393	-0.0730681	G1	Normal	4158	0
40	1599	Normal	Prostate																			HNSCC16_P11_HNSCC16_P11_D11	0.416765	0.307897	0.141986	13.6501	-0.0750253	-0.029905	G1	Normal	2804	0
41	1782	Normal	Prostate																			HNSCC16_P11_HNSCC16_P11_D12	0.353166	0.3675	0.134981	12.9426	-0.104482	-0.0312921	G1	Normal	4041	0
42	1582	Normal	Prostate																			HNSCC16_P11_HNSCC16_P11_E01	0.38144	0.329986	0.147432	13.4769	-0.0454104	-0.11774	G1	Normal	3244	0
43	1546	Normal	Prostate																			HNSCC16_P11_HNSCC16_P11_E05	0.336586	0.283033	0.134615	13.4358	-0.0632896	-0.00444422	G1	Normal	3372	0
44	1565	Normal	Prostate																			HNSCC16_P11_HNSCC16_P11_E08	0.467984	0.305583	0.14848	14.3735	-0.124513	-0.0704477	G1	Normal	3557	0
45	1155	Normal	Prostate																			HNSCC16_P11_HNSCC16_P11_E10	0.338851	0.299969	0.127413	12.3615	-0.016174	-0.0806794	G1	Normal	2960	0
46	1197	Normal	Prostate																			HNSCC16_P11_HNSCC16_P11_E11	0.35596	0.283014	0.13691	13.1658	-0.0267578	-0.113765	G1	Normal	3036	0
47	1053	Normal	Prostate																			HNSCC16_P11_HNSCC16_P11_F01	0.419943	0.354756	0.147445	14.1526	-0.109019	-0.112247	G1	Normal	3556	0
48	1453	Normal	Prostate																			HNSCC16_P11_HNSCC16_P11_F02	0.432566	0.301727	0.151776	14.1639	-0.134759	-0.0256508	G1	Normal	3481	0
489	2223	Normal	Prostate																			HNSCC16_P11_HNSCC16_P11_F07	0.426396	0.312731	0.155668	14.4924	-0.0775821	-0.108265	G1	Normal	2975	0
49	1459	Normal	Prostate																			HNSCC16_P11_HNSCC16_P11_F09	0.367926	0.359335	0.132456	13.1465	-0.0758101	-0.0356079	G1	Normal	3608	0
490	2682	Normal	Prostate																			HNSCC16_P11_HNSCC16_P11_F12	0.464399	0.225635	0.147736	14.6043	-0.039976	-0.0769925	G1	Normal	3424	0
491	2568	Normal	Prostate																			HNSCC16_P11_HNSCC16_P11_G01	0.433105	0.27993	0.147875	13.8008	-0.12923	-0.0657275	G1	Normal	3150	0
492	1265	Normal	Prostate																			HNSCC16_P11_HNSCC16_P11_G02	0.374408	0.248226	0.143106	13.9751	-0.13507	-0.0215262	G1	Normal	3860	0
493	1664	Normal	Prostate																			HNSCC16_P11_HNSCC16_P11_G03	0.421217	0.257481	0.147441	13.7475	-0.0925293	-0.0654181	G1	Normal	3112	0
494	1146	Normal	Prostate																			HNSCC16_P11_HNSCC16_P11_G05	0.291184	0.321212	0.122727	12.0457	-0.0712878	-0.0619485	G1	Normal	2381	0
495	2715	Normal	Prostate																			HNSCC16_P11_HNSCC16_P11_G06	0.406424	0.30114	0.126709	13.4001	-0.121582	-0.104152	G1	Normal	3830	0
496	2296	Normal	Prostate																			HNSCC16_P11_HNSCC16_P11_G07	0.398278	0.227736	0.140902	13.4256	-0.0277004	-0.030655	G1	Normal	3647	0
497	2177	Normal	Prostate																			HNSCC16_P11_HNSCC16_P11_G08	0.419125	0.248034	0.138995	13.4039	-0.0476922	-0.0334835	G1	Normal	3502	0
498	654	Normal	Prostate																			HNSCC16_P11_HNSCC16_P11_G09	0.416345	0.329367	0.141929	13.7809	-0.0452678	-0.0799926	G1	Normal	3740	0
499	2009	Normal	Prostate																			HNSCC16_P11_HNSCC16_P11_H02	0.401604	0.207371	0.147585	13.9092	-0.0611396	-0.0421543	G1	Normal	3627	0
5	1910	Normal	Prostate																			HNSCC16_P12_HNSCC16_P12_A01	0.398482	0.337919	0.135257	13.1766	-0.0713485	-0.0218888	G1	Normal	4206	0
50	1412	Normal	Prostate																			HNSCC16_P12_HNSCC16_P12_A03	0.432652	0.292851	0.138064	13.2543	-0.112247	-0.0473344	G1	Normal	4732	0
500	2519	Normal	Prostate																			HNSCC16_P12_HNSCC16_P12_A07	0.397566	0.22468	0.143226	13.751	-0.0659922	-0.0843631	G1	Normal	4044	0
501	2393	Normal	Prostate																			HNSCC16_P12_HNSCC16_P12_A12	0.382278	0.249688	0.138218	13.3065	-0.0797358	-0.0631954	G1	Normal	3650	0
502	1686	Normal	Prostate																			HNSCC16_P12_HNSCC16_P12_B02	0.358575	0.309486	0.12853	12.4601	-0.0359973	-0.0486069	G1	Normal	2937	0
503	2116	Normal	Prostate																			HNSCC16_P12_HNSCC16_P12_B03	0.379948	0.248307	0.149101	14.0524	-0.00233528	-5.02897e-06	G1	Normal	3471	0
504	1155	Normal	Prostate																			HNSCC16_P12_HNSCC16_P12_B07	0.377532	0.227406	0.140164	13.3282	-0.0805873	-0.0180089	G1	Normal	3474	0
505	2905	Normal	Prostate																			HNSCC16_P12_HNSCC16_P12_B08	0.382593	0.402541	0.127362	12.5543	-0.076633	-0.0718074	G1	Normal	4003	0
506	1920	Normal	Prostate																			HNSCC16_P12_HNSCC16_P12_B10	0.408935	0.225491	0.149003	14.06	-0.172371	-0.0533537	G1	Normal	3559	0
507	1819	Normal	Prostate																			HNSCC16_P12_HNSCC16_P12_B12	0.363596	0.22795	0.144832	13.4636	-0.0687891	-0.106045	G1	Normal	3517	0
508	1829	Normal	Prostate																			HNSCC16_P12_HNSCC16_P12_C02	0.407713	0.237445	0.140915	13.7501	-0.128653	-0.0861052	G1	Normal	3826	0
509	1979	Normal	Prostate																			HNSCC16_P12_HNSCC16_P12_C03	0.366674	0.244643	0.141405	12.9841	-0.112434	-0.0629638	G1	Normal	4393	0
51	1463	Normal	Prostate																			HNSCC16_P12_HNSCC16_P12_C05	0.277868	0.315494	0.135085	12.5006	-0.152448	-0.046565	G1	Normal	3499	0
510	596	Normal	Prostate																			HNSCC16_P12_HNSCC16_P12_C09	0.414585	0.302387	0.152999	14.2598	-0.0851649	-0.0050639	G1	Normal	3383	0
511	2416	Normal	Prostate																			HNSCC16_P12_HNSCC16_P12_C10	0.385153	0.261162	0.132972	13.0433	-0.100501	-0.0877369	G1	Normal	3854	0
512	2788	Normal	Prostate																			HNSCC16_P12_HNSCC16_P12_E01	0.384927	0.288789	0.141268	13.3548	-0.0288312	-0.106201	G1	Normal	3455	0
513	2026	Normal	Prostate																			HNSCC16_P12_HNSCC16_P12_E03	0.32974	0.284424	0.117375	11.7647	-0.0376415	-0.0437277	G1	Normal	3666	0
514	2159	Normal	Prostate																			HNSCC16_P12_HNSCC16_P12_E04	0.366241	0.245163	0.138401	13.5279	-0.150726	-0.0712176	G1	Normal	3445	0
515	1417	Normal	Prostate																			HNSCC16_P12_HNSCC16_P12_E06	0.440252	0.28258	0.13747	13.818	-0.0421623	-0.0834179	G1	Normal	3634	0
516	1676	Normal	Prostate																			HNSCC16_P12_HNSCC16_P12_E07	0.335521	0.340455	0.135132	13.003	-0.0798733	-0.061044	G1	Normal	3088	0
517	1327	Normal	Prostate																			HNSCC16_P12_HNSCC16_P12_E09	0.334922	0.260058	0.141391	13.3244	-0.146904	-0.117824	G1	Normal	3256	0
518	2386	Normal	Prostate																			HNSCC16_P12_HNSCC16_P12_E11	0.368316	0.280341	0.150915	14.1863	-0.101638	-0.00754538	G1	Normal	3223	0
519	2369	Normal	Prostate																			HNSCC16_P12_HNSCC16_P12_F04	0.384075	0.190593	0.124803	12.8307	-0.072943	-0.159401	G1	Normal	4265	0
52	1435	Normal	Prostate																			HNSCC16_P12_HNSCC16_P12_F07	0.385651	0.27668	0.146548	13.4817	-0.157614	-0.020332	G1	Normal	3590	0
520	2004	Normal	Prostate																			HNSCC16_P12_HNSCC16_P12_F10	0.369776	0.263138	0.138144	13.1495	-0.0060652	-0.05761	G1	Normal	3488	0
521	2188	Normal	Prostate																			HNSCC16_P12_HNSCC16_P12_F12	0.351967	0.21605	0.134003	12.7431	-0.00930657	-0.0696809	G1	Normal	3975	0
522	678	Normal	Prostate																			HNSCC16_P12_HNSCC16_P12_G01	0.288173	0.288414	0.129098	12.0698	-0.0761408	-0.108303	G1	Normal	3663	0.029983
523	2102	Normal	Prostate																			HNSCC16_P12_HNSCC16_P12_G02	0.288644	0.270991	0.131383	12.7493	-0.0527131	-0.0358341	G1	Normal	3321	0
524	2289	Normal	Prostate																			HNSCC16_P12_HNSCC16_P12_G04	0.355261	0.328009	0.155407	14.2372	-0.00507105	-0.0355933	G1	Normal	3736	0
525	2667	Normal	Prostate																			HNSCC16_P12_HNSCC16_P12_G06	0.41408	0.427733	0.155437	13.8631	-0.112598	-0.0440242	G1	Normal	4349	0
526	1960	Normal	Prostate																			HNSCC16_P12_HNSCC16_P12_G08	0.362185	0.312055	0.140684	13.1415	-0.036344	-0.102587	G1	Normal	4093	0
527	1672	Normal	Prostate																			HNSCC16_P12_HNSCC16_P12_G09	0.332032	0.244001	0.147551	14.0008	-0.146521	-0.0579231	G1	Normal	3531	0
528	2070	Normal	Prostate																			HNSCC16_P12_HNSCC16_P12_G12	0.343565	0.270637	0.139487	13.1676	-0.0517453	-0.0302353	G1	Normal	3483	0
529	5047	Normal	Prostate																			HNSCC16_P12_HNSCC16_P12_H01	0.339135	0.265102	0.141865	12.9151	-0.101332	-0.0439134	G1	Normal	3831	0
53	1100	Normal	Prostate																			HNSCC16_P12_HNSCC16_P12_H02	0.290766	0.298083	0.132952	12.7892	-0.114063	-0.00390254	G1	Normal	3598	0
530	1012	Normal	Prostate																			HNSCC16_P12_HNSCC16_P12_H10	0.281658	0.347691	0.128635	12.0588	-0.0603223	-0.0472694	G1	Normal	3371	0
531	1688	Normal	Prostate																			HNSCC16_P12_HNSCC16_P12_H12	0.38371	0.250663	0.145793	13.9052	-0.0957347	-0.0663326	G1	Normal	3183	0
532	1798	Normal	Prostate																			HNSCC16_P14_HNSCC16_P14_A03	0.412988	0.252611	0.147419	14.1758	-0.0868501	-0.153414	G1	Normal	3769	0
533	1953	Normal	Prostate																			HNSCC16_P14_HNSCC16_P14_A04	0.379165	0.301359	0.132434	12.9893	-0.0102567	-0.0603974	G1	Normal	3521	0
534	3179	Normal	Prostate																			HNSCC16_P14_HNSCC16_P14_A05	0.374953	0.159925	0.136335	13.4159	-0.121717	-0.048872	G1	Normal	4175	0
535	835	Normal	Prostate																			HNSCC16_P14_HNSCC16_P14_A08	0.363633	0.132128	0.134591	12.9317	-0.0624631	-0.057192	G1	Normal	3141	0
536	2415	Normal	Prostate																			HNSCC16_P14_HNSCC16_P14_A09	0.361366	0.37805	0.146126	13.8847	-0.145649	-0.143451	G1	Normal	2945	0
537	2170	Normal	Prostate																			HNSCC16_P14_HNSCC16_P14_A10	0.373539	0.227167	0.140113	13.3906	-0.0761499	-0.190051	G1	Normal	4040	0
538	2010	Normal	Prostate																			HNSCC16_P14_HNSCC16_P14_A11	0.398505	0.219637	0.14238	13.9936	-0.00923617	-0.0677261	G1	Normal	3604	0
539	2187	Normal	Prostate																			HNSCC16_P14_HNSCC16_P14_B01	0.35935	0.246994	0.144693	13.8399	-0.0473284	-0.124089	G1	Normal	3018	0
54	1648	Normal	Prostate																			HNSCC16_P14_HNSCC16_P14_B04	0.380305	0.179433	0.143083	13.6565	-0.106239	-0.0105549	G1	Normal	4050	0
540	2232	Normal	Prostate																			HNSCC16_P14_HNSCC16_P14_B07	0.504778	0.365135	0.17242	16.0084	-0.0327148	-0.000323228	G1	Normal	3504	0
541	1373	Normal	Prostate																			HNSCC16_P14_HNSCC16_P14_B09	0.385459	0.247836	0.128131	12.7426	-0.107663	-0.151829	G1	Normal	3749	0
542	1900	Normal	Prostate																			HNSCC16_P14_HNSCC16_P14_B10	0.3939	0.206751	0.141202	13.6982	-0.0325552	-0.0742522	G1	Normal	2630	0
543	1238	Normal	Prostate																			HNSCC16_P14_HNSCC16_P14_C01	0.347081	0.270577	0.13594	13.1042	-0.0576186	-0.103158	G1	Normal	2659	0
544	2119	Normal	Prostate																			HNSCC16_P14_HNSCC16_P14_C02	0.405155	0.260715	0.149153	13.6167	-0.0982358	-0.082777	G1	Normal	3586	0
545	2053	Normal	Prostate																			HNSCC16_P14_HNSCC16_P14_C03	0.363866	0.181342	0.125534	12.6426	-0.0284437	-0.0673041	G1	Normal	3905	0
546	1958	Normal	Prostate																			HNSCC16_P14_HNSCC16_P14_C06	0.376181	0.21815	0.135929	13.2409	-0.0756674	-0.0943849	G1	Normal	3898	0
547	2021	Normal	Prostate																			HNSCC16_P14_HNSCC16_P14_D08	0.388108	0.210863	0.13144	13.0797	-0.0913322	-0.0130848	G1	Normal	2408	0
548	750	Normal	Prostate																			HNSCC16_P14_HNSCC16_P14_E02	0.39497	0.369461	0.148209	13.9864	-0.112369	-0.104083	G1	Normal	2902	0
549	2626	Normal	Prostate																			HNSCC16_P14_HNSCC16_P14_E03	0.393907	0.230287	0.148731	13.9716	-0.130636	-0.00117243	G1	Normal	3179	0
55	1716	Normal	Prostate																			HNSCC16_P14_HNSCC16_P14_E06	0.420027	0.251374	0.148066	13.8535	-0.083726	-0.0916041	G1	Normal	2948	0
550	2180	Normal	Prostate																			HNSCC16_P14_HNSCC16_P14_E07	0.289961	0.274524	0.123781	12.1701	-0.0853996	-0.00842069	G1	Normal	2460	0
551	1928	Normal	Prostate																			HNSCC16_P14_HNSCC16_P14_E08	0.451222	0.360608	0.138171	14.1618	-0.0794765	-0.0561639	G1	Normal	3875	0
552	2522	Normal	Prostate																			HNSCC16_P14_HNSCC16_P14_E10	0.367153	0.316521	0.137291	13.2532	-0.0782168	-0.0367923	G1	Normal	3341	0
553	2146	Normal	Prostate																			HNSCC16_P14_HNSCC16_P14_F03	0.399242	0.277737	0.13445	13.241	-0.0572536	-0.0609424	G1	Normal	3160	0
554	1354	Normal	Prostate																			HNSCC16_P14_HNSCC16_P14_F06	0.269428	0.422143	0.11947	11.603	-0.111304	-0.0215036	G1	Normal	2970	0
555	1553	Normal	Prostate																			HNSCC16_P14_HNSCC16_P14_F07	0.298653	0.33422	0.129105	12.5797	-0.062162	-0.0400632	G1	Normal	2793	0
556	1287	Normal	Prostate																			HNSCC16_P14_HNSCC16_P14_F11	0.328947	0.325973	0.134276	12.8382	-0.0392243	-0.0972294	G1	Normal	2762	0
557	2607	Normal	Prostate																			HNSCC16_P14_HNSCC16_P14_G01	0.367275	0.391527	0.13133	12.598	-0.0155849	-0.0519612	G1	Normal	2623	0
558	2504	Normal	Prostate																			HNSCC16_P14_HNSCC16_P14_G05	0.3948	0.254763	0.138295	13.7323	-0.0893464	-0.100583	G1	Normal	4330	0
559	2483	Normal	Prostate																			HNSCC16_P14_HNSCC16_P14_G10	0.349092	0.354272	0.119131	12.6734	-0.118106	-0.00062406	G1	Normal	4033	0
56	1204	Normal	Prostate																			HNSCC16_P14_HNSCC16_P14_G11	0.341727	0.190761	0.143852	14.0894	-0.0717442	-0.0312185	G1	Normal	2652	0
560	2040	Normal	Prostate																			HNSCC16_P14_HNSCC16_P14_G12	0.367363	0.246008	0.124646	12.4643	-0.0597071	-0.0893142	G1	Normal	5531	0
561	2103	Normal	Prostate																			HNSCC16_P14_HNSCC16_P14_H01	0.277222	0.274266	0.128109	12.4134	-0.0448119	-0.0618111	G1	Normal	2817	0
562	584	Normal	Prostate																			HNSCC16_P14_HNSCC16_P14_H03	0.332921	0.271901	0.140381	13.5504	-0.057352	-0.0563318	G1	Normal	3188	0
563	1871	Normal	Prostate																			HNSCC16_P2_A03_S3_comb	0.362027	0.453178	0.131281	12.6342	-0.133047	-0.220972	G1	Normal	4695	0
564	2201	Normal	Prostate																			HNSCC16_P2_A04_S4_comb	0.346265	0.506479	0.140351	13.0423	-0.158895	-0.146253	G1	Normal	4469	0
565	1908	Normal	Prostate																			HNSCC16_P2_A05_S5_comb	0.368865	0.157014	0.142165	12.309	-0.216914	-0.182273	G1	Normal	4930	0
566	1737	Normal	Prostate																			HNSCC16_P2_A06_S6_comb	0.358354	0.545641	0.133426	12.7002	-0.0907163	-0.137463	G1	Normal	5556	0
567	1084	Normal	Prostate																			HNSCC16_P2_A08_S8_comb	0.352142	0.563346	0.128019	12.3595	-0.125467	-0.199299	G1	Normal	5890	0
568	1831	Normal	Prostate																			HNSCC16_P2_A09_S9_comb	0.338756	0.52276	0.133676	12.4155	-0.195824	-0.144836	G1	Normal	5434	0
569	885	Normal	Prostate																			HNSCC16_P2_A10_S10_comb	0.413384	0.32649	0.141432	13.1954	-0.107628	-0.133238	G1	Normal	5443	0
57	1064	Normal	Prostate																			HNSCC16_P2_A12_S12_comb	0.387609	0.431426	0.13914	13.1505	-0.200677	-0.163326	G1	Normal	4538	0
570	1935	Normal	Prostate																			HNSCC16_P2_B01_S13_comb	0.366125	0.207296	0.123872	11.996	-0.124542	-0.148238	G1	Normal	2628	0
571	1834	Normal	Prostate																			HNSCC16_P2_B04_S16_comb	0.456777	0.484929	0.150208	13.4947	-0.108642	-0.166378	G1	Normal	5135	0
572	725	Normal	Prostate																			HNSCC16_P2_B06_S18_comb	0.369169	0.379268	0.132239	12.7806	-0.123817	-0.194355	G1	Normal	3959	0
573	2653	Normal	Prostate																			HNSCC16_P2_B08_S20_comb	0.325433	0.76895	0.123726	11.9671	-0.111106	-0.0520752	G1	Normal	4768	0
574	1657	Normal	Prostate																			HNSCC16_P2_B09_S21_comb	0.368921	0.358138	0.13696	12.3856	-0.0379434	-0.162776	G1	Normal	4390	0
575	2207	Normal	Prostate																			HNSCC16_P2_B10_S22_comb	0.366116	0.461149	0.137697	12.7482	-0.0330915	-0.139521	G1	Normal	4718	0
576	2094	Normal	Prostate																			HNSCC16_P2_B11_S23_comb	0.31309	0.275052	0.126425	12.4621	-0.138057	-0.116638	G1	Normal	2954	0
577	1779	Normal	Prostate																			HNSCC16_P2_B12_S24_comb	0.321212	0.288538	0.121666	11.6454	-0.0605839	-0.12474	G1	Normal	3710	0
578	2290	Normal	Prostate																			HNSCC16_P2_C01_S25_comb	0.386635	0.423053	0.136739	12.8464	-0.0967896	-0.178193	G1	Normal	4510	0
58	1071	Normal	Prostate																			HNSCC16_P2_C02_S26_comb	0.386946	0.472602	0.139156	13.0454	-0.18651	-0.186511	G1	Normal	4646	0
59	1753	Normal	Prostate																			HNSCC16_P2_C03_S27_comb	0.315238	0.390908	0.116156	12.1455	-0.155587	-0.0803513	G1	Normal	4262	0
6	1468	Normal	Prostate																			HNSCC16_P2_C05_S29_comb	0.374006	0.442403	0.140922	12.8215	-0.0271607	-0.130865	G1	Normal	4556	0
60	1648	Normal	Prostate																			HNSCC16_P2_C07_S31_comb	0.342639	0.395446	0.125317	12.7351	-0.1419	-0.180047	G1	Normal	4080	0
61	1606	Normal	Prostate																			HNSCC16_P2_C08_S32_comb	0.388288	0.23378	0.149473	12.6222	-0.157264	-0.0238393	G1	Normal	4842	0
62	1566	Normal	Prostate																			HNSCC16_P2_C09_S33_comb	0.319681	0.384793	0.129135	12.2149	-0.229399	-0.0924949	G1	Normal	4151	0
626	2976	Normal	Prostate																			HNSCC16_P2_C10_S34_comb	0.315243	0.418676	0.119271	11.8599	-0.215447	-0.227838	G1	Normal	4785	0
627	3640	Normal	Prostate																			HNSCC16_P2_C11_S35_comb	0.346867	0.442036	0.124856	12.8551	-0.113177	-0.137581	G1	Normal	4343	0
628	2859	Normal	Prostate																			HNSCC16_P2_C12_S36_comb	0.274101	0.376646	0.111291	11.3777	-0.228829	-0.131252	G1	Normal	4587	0
629	2998	Normal	Prostate																			HNSCC16_P2_D01_S37_comb	0.402261	0.399066	0.136966	13.0753	-0.107617	-0.0146464	G1	Normal	3962	0
63	1250	Normal	Prostate																			HNSCC16_P2_D02_S38_comb	0.335807	0.248589	0.124413	12.2474	-0.082769	-0.0558599	G1	Normal	3045	0
630	2844	Normal	Prostate																			HNSCC16_P2_D03_S39_comb	0.3433	0.394208	0.133634	12.8953	-0.155158	-0.209127	G1	Normal	3921	0
631	3493	Normal	Prostate																			HNSCC16_P2_D04_S40_comb	0.379724	0.40359	0.12795	12.4365	-0.00368872	-0.127404	G1	Normal	4744	0
632	2751	Normal	Prostate																			HNSCC16_P2_D05_S41_comb	0.422443	0.380518	0.132291	12.9798	-0.10868	-0.124538	G1	Normal	4291	0
633	2251	Normal	Prostate																			HNSCC16_P2_D06_S42_comb	0.274787	0.503554	0.12455	12.5256	-0.0742166	-0.142262	G1	Normal	3021	0
634	2950	Normal	Prostate																			HNSCC16_P2_D07_S43_comb	0.356318	0.235478	0.123229	12.6706	-0.111061	-0.153483	G1	Normal	3625	0
635	2843	Normal	Prostate																			HNSCC16_P2_D08_S44_comb	0.354129	0.533388	0.128934	12.5007	-0.130313	-0.16467	G1	Normal	5463	0
636	2351	Normal	Prostate																			HNSCC16_P2_D09_S45_comb	0.331083	0.509011	0.129665	12.2182	-0.0683206	-0.179016	G1	Normal	5391	0
637	2451	Normal	Prostate																			HNSCC16_P2_D10_S46_comb	0.265677	0.222086	0.112774	11.0196	-0.0733256	-0.0763951	G1	Normal	2913	0
638	2870	Normal	Prostate																			HNSCC16_P2_D11_S47_comb	0.367005	0.44418	0.134203	12.9178	-0.129365	-0.134066	G1	Normal	4236	0
639	2463	Normal	Prostate																			HNSCC16_P2_D12_S48_comb	0.316365	0.663274	0.12138	12.2534	-0.0812341	-0.153797	G1	Normal	3072	0
64	1183	Normal	Prostate																			HNSCC16_P2_E01_S49_comb	0.296114	0.324839	0.117748	11.5414	-0.0876828	-0.171872	G1	Normal	4324	0
640	2286	Normal	Prostate																			HNSCC16_P2_E03_S51_comb	0.36077	0.428704	0.144766	12.819	-0.0603437	-0.142409	G1	Normal	4554	0
641	2445	Normal	Prostate																			HNSCC16_P2_E04_S52_comb	0.29166	0.491474	0.135224	12.6694	-0.156046	-0.125641	G1	Normal	4088	0
642	2532	Normal	Prostate																			HNSCC16_P2_E05_S53_comb	0.400362	0.431508	0.128468	12.8684	-0.103429	-0.150779	G1	Normal	4874	0
643	3531	Normal	Prostate																			HNSCC16_P2_E06_S54_comb	0.399288	0.606806	0.13732	12.5275	-0.12056	-0.0947505	G1	Cancer	6921	0
644	2243	Normal	Prostate																			HNSCC16_P2_E07_S55_comb	0.444442	0.475921	0.157833	13.2208	-0.135526	-0.130094	G1	Normal	5203	0
645	1938	Normal	Prostate																			HNSCC16_P2_E09_S57_comb	0.411934	0.402221	0.145367	13.3181	-0.0726294	-0.15196	G1	Normal	4358	0
646	1885	Normal	Prostate																			HNSCC16_P2_E11_S59_comb	0.333415	0.230843	0.147341	13.7055	-0.140391	-0.0598908	G1	Cancer	2768	0
647	1289	Normal	Prostate																			HNSCC16_P2_F03_S63_comb	0.35181	0.208471	0.143932	12.435	-0.194043	-0.0492463	G1	Normal	4421	0
648	1481	Normal	Prostate																			HNSCC16_P2_F07_S67_comb	0.332521	0.361206	0.12757	11.935	-0.114957	-0.157372	G1	Normal	4611	0
649	1767	Normal	Prostate																			HNSCC16_P2_F08_S68_comb	0.280228	0.373655	0.110267	11.2346	-0.0810672	-0.151212	G1	Normal	4746	0
65	1620	Normal	Prostate																			HNSCC16_P2_F09_S69_comb	0.441986	0.8421	0.150285	13.4486	-0.00693178	-0.188122	G1	Normal	3555	0
650	892	Normal	Prostate																			HNSCC16_P2_F10_S70_comb	0.417703	0.396289	0.142699	12.9506	-0.0348767	-0.187983	G1	Normal	4461	0
651	4727	Normal	Prostate																			HNSCC16_P2_F11_S71_comb	0.38123	0.451737	0.132713	13.073	-0.123804	-0.0636248	G1	Normal	4473	0
652	2210	Normal	Prostate																			HNSCC16_P2_F12_S72_comb	0.297893	0.521032	0.127072	12.4469	-0.0175148	-0.135511	G1	Normal	2062	0
653	3666	Normal	Prostate																			HNSCC16_P2_G01_S73_comb	0.406039	0.486008	0.143935	12.936	-0.083914	-0.228214	G1	Normal	5176	0
654	2771	Normal	Prostate																			HNSCC16_P2_G03_S75_comb	0.388759	0.434057	0.145036	12.8011	-0.0998585	-0.195399	G1	Normal	4828	0
655	3749	Normal	Prostate																			HNSCC16_P2_G04_S76_comb	0.305144	0.24954	0.124997	11.6867	-0.0972646	-0.12486	G1	Normal	3781	0
656	2551	Normal	Prostate																			HNSCC16_P2_G05_S77_comb	0.260724	0.50769	0.113801	11.0881	-0.141831	-0.206671	G1	Normal	4846	0
657	4101	Normal	Prostate																			HNSCC16_P2_G06_S78_comb	0.398085	0.26895	0.129131	12.7061	-0.135994	-0.135713	G1	Normal	5050	0
658	3311	Normal	Prostate																			HNSCC16_P2_G07_S79_comb	0.339464	0.468234	0.123458	12.2722	-0.173668	-0.216702	G1	Normal	5217	0
659	3130	Normal	Prostate																			HNSCC16_P2_G08_S80_comb	0.364215	0.378144	0.128765	12.0216	-0.0946524	-0.166994	G1	Normal	4940	0
66	1177	Normal	Prostate																			HNSCC16_P2_G09_S81_comb	0.345833	0.390512	0.118336	12.5895	-0.174553	-0.206828	G1	Normal	4110	0
660	3605	Normal	Prostate																			HNSCC16_P2_G10_S82_comb	0.418071	0.551561	0.152523	13.4125	-0.0684339	-0.151938	G1	Normal	4127	0
661	3160	Normal	Prostate																			HNSCC16_P2_G11_S83_comb	0.365945	0.410712	0.138663	12.9779	-0.0575832	-0.117306	G1	Normal	4018	0
662	3352	Normal	Prostate																			HNSCC16_P2_H01_S85_comb	0.341083	0.523335	0.117704	12.0193	-0.0894915	-0.126386	G1	Normal	4445	0
663	4511	Normal	Prostate																			HNSCC16_P2_H02_S86_comb	0.379314	0.365525	0.15084	12.6234	-0.0674896	-0.204001	G1	Normal	3901	0
664	2555	Normal	Prostate																			HNSCC16_P2_H03_S87_comb	0.181029	0.56749	0.105539	10.1888	-0.0298879	-0.174735	G1	Normal	2701	0
665	1005	Normal	Prostate																			HNSCC16_P2_H05_S89_comb	0.29932	0.483523	0.119871	11.8835	-0.178354	-0.213847	G1	Normal	3421	0
666	2552	Normal	Prostate																			HNSCC16_P2_H07_S91_comb	0.403765	0.256368	0.138316	12.7643	-0.100569	-0.163635	G1	Normal	3005	0
667	3447	Normal	Prostate																			HNSCC16_P2_H08_S92_comb	0.380596	0.178496	0.129625	12.4398	-0.017696	-0.143902	G1	Normal	6163	0
668	2609	Normal	Prostate																			HNSCC16_P2_H09_S93_comb	0.290104	0.362992	0.108239	11.5252	-0.0725974	-0.147188	G1	Normal	4449	0
669	3697	Normal	Prostate																			HNSCC16_P2_H10_S94_comb	0.356984	0.232163	0.141531	12.6112	-0.140199	-0.184049	G1	Normal	4396	0
67	1375	Normal	Prostate																			HNSCC16_P2_H11_S95_comb	0.390066	0.47556	0.136931	13.0895	-0.0849328	-0.105291	G1	Normal	4993	0
670	1772	Normal	Prostate																			HNSCC16_P2_H12_S96_comb	0.32916	0.289219	0.123247	12.5982	-0.153228	-0.110576	G1	Normal	3084	0
671	2198	Normal	Prostate																			HNSCC16_P4_HNSCC16_P4_A03	0.256236	0.620778	0.122433	11.6822	-0.123764	-0.0620673	G1	Normal	3669	0.02148
672	2825	Normal	Prostate																			HNSCC16_P4_HNSCC16_P4_A07	0.314713	0.188739	0.125414	12.1432	-0.0826975	-0.104397	G1	Normal	3806	0
68	1072	Normal	Prostate																			HNSCC16_P4_HNSCC16_P4_A08	0.375863	0.243051	0.128358	12.8795	-0.140601	-0.0589976	G1	Normal	4132	0
69	1657	Normal	Prostate																			HNSCC16_P4_HNSCC16_P4_A10	0.330851	0.196883	0.141094	12.927	-0.00971322	-0.0738788	G1	Normal	3488	0
7	1494	Normal	Prostate																			HNSCC16_P4_HNSCC16_P4_A12	0.417422	0.435392	0.156336	13.9697	-0.0832203	-0.0631059	G1	Normal	3121	0
70	2104	Normal	Prostate																			HNSCC16_P4_HNSCC16_P4_B06	0.370842	0.513391	0.135828	12.9178	-0.0624469	-0.163708	G1	Normal	3885	0
71	1749	Normal	Prostate																			HNSCC16_P4_HNSCC16_P4_B07	0.400479	0.325624	0.146924	13.7761	-0.0315865	-0.0634174	G1	Normal	3279	0
72	1144	Normal	Prostate																			HNSCC16_P4_HNSCC16_P4_B09	0.357797	0.317167	0.140871	12.6316	-0.114852	-0.0703742	G1	Normal	4490	0
73	1596	Normal	Prostate																			HNSCC16_P4_HNSCC16_P4_B11	0.408851	0.282078	0.142757	12.9357	-0.115705	-0.153452	G1	Normal	5213	0
74	1527	Normal	Prostate																			HNSCC16_P4_HNSCC16_P4_C03	0.34132	0.318652	0.135087	12.5145	-0.0541952	-0.0287264	G1	Normal	3409	0
75	1271	Normal	Prostate																			HNSCC16_P4_HNSCC16_P4_C05	0.408424	0.201192	0.143911	13.663	-0.116001	-0.124683	G1	Normal	3390	0
756	1785	Normal	Prostate																			HNSCC16_P4_HNSCC16_P4_C07	0.413926	0.450542	0.153112	14.5022	-0.0394301	-0.138533	G1	Normal	2842	0
757	2191	Normal	Prostate																			HNSCC16_P4_HNSCC16_P4_C08	0.334313	0.417201	0.121772	12.1718	-0.0927783	-0.0742967	G1	Normal	3401	0
758	1865	Normal	Prostate																			HNSCC16_P4_HNSCC16_P4_C09	0.365488	0.304078	0.135422	13.1023	-0.0651397	-0.0514668	G1	Normal	3080	0
759	1925	Normal	Prostate																			HNSCC16_P4_HNSCC16_P4_C10	0.459593	0.235873	0.151139	14.8464	-0.0562855	-0.12447	G1	Normal	3766	0
76	1362	Normal	Prostate																			HNSCC16_P4_HNSCC16_P4_C11	0.324792	0.274053	0.127046	12.2168	-0.0403478	-0.109441	G1	Normal	3059	0
760	1913	Normal	Prostate																			HNSCC16_P4_HNSCC16_P4_C12	0.358301	0.374296	0.116654	12.175	-0.141775	-0.193448	G1	Cancer	5325	0
761	2302	Normal	Prostate																			HNSCC16_P4_HNSCC16_P4_D05	0.408254	0.338179	0.145323	13.7943	-0.022414	-0.100768	G1	Normal	4221	0
762	1733	Normal	Prostate																			HNSCC16_P4_HNSCC16_P4_D06	0.403558	0.311579	0.145145	13.6492	-0.182452	-0.0900268	G1	Cancer	3380	0
763	2141	Normal	Prostate																			HNSCC16_P4_HNSCC16_P4_D09	0.364012	0.438277	0.135336	13.1258	-0.158645	-0.0475362	G1	Normal	3486	0
764	2156	Normal	Prostate																			HNSCC16_P4_HNSCC16_P4_D11	0.329686	0.239579	0.131583	12.3402	-0.129835	-0.122813	G1	Normal	3847	0
765	1609	Normal	Prostate																			HNSCC16_P4_HNSCC16_P4_E01	0.370901	0.409033	0.140808	12.9217	-0.0415716	-0.0426245	G1	Normal	3556	0
766	2034	Normal	Prostate																			HNSCC16_P4_HNSCC16_P4_E06	0.386653	0.256243	0.135164	12.9265	-0.0820809	-0.007941	G1	Normal	3331	0
767	2569	Normal	Prostate																			HNSCC16_P4_HNSCC16_P4_E09	0.403219	0.451539	0.13922	13.1527	-0.108143	-0.0940925	G1	Normal	4058	0
768	2968	Normal	Prostate																			HNSCC16_P4_HNSCC16_P4_E12	0.343475	0.332465	0.131697	12.566	-0.0840578	-0.149162	G1	Normal	3045	0
769	1973	Normal	Prostate																			HNSCC16_P4_HNSCC16_P4_F01	0.403958	0.467341	0.133476	12.6745	-0.162433	-0.0505818	G1	Cancer	5753	0
77	1495	Normal	Prostate																			HNSCC16_P4_HNSCC16_P4_F03	0.297398	0.260429	0.128908	12.5006	-0.0883453	-0.119328	G1	Normal	2670	0
770	1737	Normal	Prostate																			HNSCC16_P4_HNSCC16_P4_F04	0.376179	0.262559	0.130497	12.3222	-0.044791	-0.126023	G1	Cancer	6198	0
771	1618	Normal	Prostate																			HNSCC16_P4_HNSCC16_P4_F06	0.369069	0.424357	0.126706	12.3342	-0.0706111	-0.175381	G1	Cancer	5894	0
772	2235	Normal	Prostate																			HNSCC16_P4_HNSCC16_P4_F10	0.413033	0.289276	0.151913	14.3016	-0.106581	-0.0226	G1	Normal	2759	0
773	2276	Normal	Prostate																			HNSCC16_P4_HNSCC16_P4_F11	0.36275	0.426872	0.13948	13.272	-0.00140018	-0.118643	G1	Normal	2573	0
774	3234	Normal	Prostate																			HNSCC16_P4_HNSCC16_P4_G04	0.398957	0.251667	0.132147	12.9981	-0.116727	-0.0325129	G1	Normal	3183	0
775	2445	Normal	Prostate																			HNSCC16_P4_HNSCC16_P4_G05	0.36512	0.484267	0.122091	12.2919	-0.0889832	-0.115834	G1	Normal	3261	0
776	3043	Normal	Prostate																			HNSCC16_P4_HNSCC16_P4_G06	0.395896	0.223877	0.147611	13.4876	-0.00712161	-0.0947952	G1	Normal	3202	0
777	2756	Normal	Prostate																			HNSCC16_P4_HNSCC16_P4_G08	0.402683	0.582604	0.14581	13.6499	-0.101293	-0.135752	G1	Normal	3104	0
778	2839	Normal	Prostate																			HNSCC16_P4_HNSCC16_P4_G10	0.362984	0.178645	0.131555	12.6957	-0.0692032	-0.151992	G1	Normal	3575	0
779	3043	Normal	Prostate																			HNSCC16_P4_HNSCC16_P4_H07	0.404829	0.235062	0.137271	12.8682	-0.0685887	-0.156604	G1	Normal	3775	0
78	1179	Normal	Prostate																			HNSCC16_P4_HNSCC16_P4_H09	0.374632	0.256016	0.142149	13.7527	-0.00467201	-0.149396	G1	Normal	2890	0
780	2571	Normal	Prostate																			HNSCC16_P4_HNSCC16_P4_H11	0.353762	0.688243	0.142502	13.1315	-0.0177683	-0.0886962	G1	Normal	2803	0
781	2382	Normal	Prostate																			HNSCC16_P4_HNSCC16_P4_H12	0.377816	0.179311	0.145029	12.6606	-0.0552036	-0.0071038	G1	Cancer	6530	0.47301
782	1769	Normal	Prostate																			HNSCC16_P5_HNSCC16_P5_A01	0.404632	0.25419	0.129646	12.5981	-0.107661	-0.154109	G1	Cancer	6178	0
783	1584	Normal	Prostate																			HNSCC16_P5_HNSCC16_P5_A02	0.453239	0.21267	0.166312	15.6277	-0.0535909	-0.0989361	G1	Normal	3241	0
784	2252	Normal	Prostate																			HNSCC16_P5_HNSCC16_P5_A04	0.383614	0.461014	0.126755	12.7766	-0.0643567	-0.0611582	G1	Cancer	5047	0
785	1630	Normal	Prostate																			HNSCC16_P5_HNSCC16_P5_A05	0.217162	0.171997	0.112106	11.0221	-0.116144	-0.0699059	G1	Normal	3121	0
786	1773	Normal	Prostate																			HNSCC16_P5_HNSCC16_P5_A08	0.339527	0.318598	0.124766	12.6283	-0.125148	-0.0046712	G1	Cancer	4398	0
787	1704	Normal	Prostate																			HNSCC16_P5_HNSCC16_P5_A09	0.28378	0.220876	0.121709	12.1341	-0.0453358	-0.129459	G1	Normal	2639	0
788	2295	Normal	Prostate																			HNSCC16_P5_HNSCC16_P5_A10	0.374524	0.426196	0.135742	13.4336	-0.014368	-0.0582594	G1	Normal	3448	0
789	2643	Normal	Prostate																			HNSCC16_P5_HNSCC16_P5_B02	0.348142	0.363768	0.129919	12.763	-0.0471602	-0.0814434	G1	Normal	2871	0
79	1393	Normal	Prostate																			HNSCC16_P5_HNSCC16_P5_B03	0.350811	0.330673	0.140595	13.7113	-0.049257	-0.00747982	G1	Normal	2919	0
790	2641	Normal	Prostate																			HNSCC16_P5_HNSCC16_P5_B04	0.328941	0.228639	0.120425	11.8375	-0.126537	-0.104706	G1	Cancer	4892	0
791	5154	Normal	Prostate																			HNSCC16_P5_HNSCC16_P5_B05	0.403108	0.190667	0.141104	13.6619	-0.104602	-0.125117	G1	Normal	2990	0
792	3556	Normal	Prostate																			HNSCC16_P5_HNSCC16_P5_B06	0.41116	0.339006	0.133739	13.163	-0.0694359	-0.0574753	G1	Cancer	3091	0
793	2811	Normal	Prostate																			HNSCC16_P5_HNSCC16_P5_B08	0.381779	0.257836	0.138266	13.1366	-0.12901	-0.102137	G1	Normal	3168	0
794	1498	Normal	Prostate																			HNSCC16_P5_HNSCC16_P5_B10	0.353675	0.327585	0.126706	12.8222	-0.0716592	-0.0309894	G1	Normal	2123	0
795	2166	Normal	Prostate																			HNSCC16_P5_HNSCC16_P5_B11	0.398061	0.723146	0.138131	13.3484	-0.0205597	-0.0230323	G1	Cancer	4592	0
796	3006	Normal	Prostate																			HNSCC16_P5_HNSCC16_P5_B12	0.292727	0.356281	0.120219	11.7076	-0.0674809	-0.0941284	G1	Normal	2884	0
797	1784	Normal	Prostate																			HNSCC16_P5_HNSCC16_P5_C01	0.410399	0.381892	0.13715	13.5122	-0.0807188	-0.067238	G1	Normal	4116	0
798	2296	Normal	Prostate																			HNSCC16_P5_HNSCC16_P5_C07	0.502826	0.519395	0.159099	14.7584	-0.10949	-0.085212	G1	Normal	3738	0
799	2326	Normal	Prostate																			HNSCC16_P5_HNSCC16_P5_C08	0.397324	0.199224	0.144572	14.5089	-0.0711062	-0.0965867	G1	Normal	2141	0
8	1588	Normal	Prostate																			HNSCC16_P5_HNSCC16_P5_C09	0.362803	0.296998	0.134296	12.4601	-0.0822075	-0.019264	G1	Cancer	5608	0
80	1132	Normal	Prostate																			HNSCC16_P5_HNSCC16_P5_C10	0.417333	0.310988	0.154784	15.02	-0.0542047	-0.0729112	G1	Normal	2390	0
800	2115	Normal	Prostate																			HNSCC16_P5_HNSCC16_P5_C11	0.281394	0.550256	0.118809	11.3097	-0.0712218	-0.023776	G1	Normal	2729	0
801	2426	Normal	Prostate																			HNSCC16_P5_HNSCC16_P5_D03	0.37021	0.690679	0.138505	13.2742	-0.0998658	-0.0772798	G1	Normal	2590	0
802	2585	Normal	Prostate																			HNSCC16_P5_HNSCC16_P5_D04	0.334876	0.598441	0.122724	12.3761	-0.147907	-0.103466	G1	Normal	2733	0
803	1644	Normal	Prostate																			HNSCC16_P5_HNSCC16_P5_D05	0.20948	0.303947	0.106216	10.7394	-0.130675	-0.13665	G1	Normal	2342	0
804	2769	Normal	Prostate																			HNSCC16_P5_HNSCC16_P5_D06	0.490559	0.178753	0.154246	14.9606	-0.160485	-0.0280891	G1	Normal	3499	0
805	2396	Normal	Prostate																			HNSCC16_P5_HNSCC16_P5_D08	0.275107	0.254202	0.123311	12.1491	-0.0714585	-0.119113	G1	Normal	2086	0
806	1598	Normal	Prostate																			HNSCC16_P5_HNSCC16_P5_E01	0.333279	0.250649	0.116647	11.8941	-0.117444	-0.143272	G1	Normal	3149	0
807	2809	Normal	Prostate																			HNSCC16_P5_HNSCC16_P5_E02	0.440991	0.219181	0.154446	14.2403	-0.0586411	-0.0169868	G1	Normal	3239	0
808	2012	Normal	Prostate																			HNSCC16_P5_HNSCC16_P5_E10	0.365648	0.392316	0.135148	13.4866	-0.0690685	-0.108098	G1	Normal	2639	0
809	1788	Normal	Prostate																			HNSCC16_P5_HNSCC16_P5_E11	0.329698	0.41821	0.138761	13.1479	-0.0967965	-0.10968	G1	Normal	2977	0
81	1425	Normal	Prostate																			HNSCC16_P5_HNSCC16_P5_F01	0.375948	0.216783	0.13413	13.3364	-0.0958747	-0.0208926	G1	Normal	3015	0
810	2213	Normal	Prostate																			HNSCC16_P5_HNSCC16_P5_F02	0.296987	0.260604	0.11954	11.8071	-0.14617	-0.0955259	G1	Normal	2093	0
811	3560	Normal	Prostate																			HNSCC16_P5_HNSCC16_P5_F03	0.391957	0.38156	0.134722	13.1773	-0.0624737	-0.0449456	G1	Normal	2470	0
812	2057	Normal	Prostate																			HNSCC16_P5_HNSCC16_P5_F04	0.360041	0.362344	0.11861	12.3113	-0.158072	-0.0934036	G1	Cancer	6371	0
813	3515	Normal	Prostate																			HNSCC16_P5_HNSCC16_P5_F05	0.350405	0.209038	0.123941	12.596	-0.114513	-0.180959	G1	Normal	3934	0
814	1992	Normal	Prostate																			HNSCC16_P5_HNSCC16_P5_F06	0.400447	0.615039	0.141545	13.5455	-0.0405499	-0.0779818	G1	Normal	3690	0
815	1558	Normal	Prostate																			HNSCC16_P5_HNSCC16_P5_F08	0.389627	0.32868	0.153833	13.1261	-0.120411	-0.169652	G1	Normal	3839	0
816	2204	Normal	Prostate																			HNSCC16_P5_HNSCC16_P5_F09	0.349148	0.545591	0.125728	12.5534	-0.126497	-0.0551807	G1	Normal	3660	0
817	1856	Normal	Prostate																			HNSCC16_P5_HNSCC16_P5_G10	0.491439	0.162734	0.158527	14.9874	-0.0802583	-0.146789	G1	Normal	2842	0
818	1558	Normal	Prostate																			HNSCC16_P5_HNSCC16_P5_H01	0.37605	0.355788	0.136397	12.4659	-0.126082	-0.0617832	G1	Cancer	6434	0
819	2401	Normal	Prostate																			HNSCC16_P5_HNSCC16_P5_H06	0.390088	0.292015	0.131243	13.0862	-0.124822	-0.136089	G1	Normal	3061	0
82	1184	Normal	Prostate																			HNSCC16_P5_HNSCC16_P5_H07	0.345113	0.369136	0.130319	11.9537	-0.075469	-0.137793	G1	Cancer	7275	0
820	3004	Normal	Prostate																			HNSCC16_P5_HNSCC16_P5_H09	0.371521	0.573223	0.130919	12.4652	-0.175071	-0.107339	G1	Cancer	6019	0
821	4087	Normal	Prostate																			HNSCC16_P5_HNSCC16_P5_H12	0.383927	0.252976	0.122297	12.1761	-0.167149	-0.144261	G1	Cancer	6764	1.4394
822	5191	Normal	Prostate																			HNSCC16_P7_HNSCC16_P7_A01	0.406505	0.198477	0.138171	13.6975	-0.106875	-0.0865864	G1	Normal	3282	0
823	2327	Normal	Prostate																			HNSCC16_P7_HNSCC16_P7_A04	0.457244	0.416087	0.145853	13.7722	0.722322	0.209144	S	Cancer	6306	0
824	1833	Normal	Prostate																			HNSCC16_P7_HNSCC16_P7_A05	0.380573	0.276238	0.13992	13.3872	-0.0379537	-0.00555142	G1	Normal	3037	0
825	2305	Normal	Prostate																			HNSCC16_P7_HNSCC16_P7_A08	0.375958	0.542273	0.138599	13.3251	-0.0569261	-0.0600755	G1	Normal	2880	0
826	1880	Normal	Prostate																			HNSCC16_P7_HNSCC16_P7_A09	0.393148	0.672726	0.129846	12.5965	-0.0781212	-0.0361212	G1	Normal	3391	0
827	2319	Normal	Prostate																			HNSCC16_P7_HNSCC16_P7_A12	0.309479	0.447768	0.100432	11.3398	-0.0459671	-0.0929642	G1	Cancer	4704	0
828	2689	Normal	Prostate																			HNSCC16_P7_HNSCC16_P7_B02	0.343175	0.220881	0.125273	12.0618	-0.00183107	-0.156302	G1	Cancer	5344	0
829	1440	Normal	Prostate																			HNSCC16_P7_HNSCC16_P7_B07	0.396559	0.338811	0.136532	12.9168	-0.00300772	-0.00903122	G1	Normal	3086	0
83	1573	Normal	Prostate																			HNSCC16_P7_HNSCC16_P7_B08	0.378643	0.244003	0.132011	12.9282	-0.12977	-0.0380743	G1	Normal	3532	0
830	1421	Normal	Prostate																			HNSCC16_P7_HNSCC16_P7_B09	0.349391	0.457366	0.119911	11.5879	-0.00968847	-0.0866701	G1	Normal	2690	0
831	1740	Normal	Prostate																			HNSCC16_P7_HNSCC16_P7_B12	0.375482	0.2414	0.137126	12.5612	-0.00774863	-0.0689951	G1	Cancer	5123	0
832	1750	Normal	Prostate																			HNSCC16_P7_HNSCC16_P7_C02	0.438126	0.282505	0.146958	13.7185	-0.0774733	-0.124664	G1	Normal	3993	0
833	2208	Normal	Prostate																			HNSCC16_P7_HNSCC16_P7_C04	0.486901	0.287476	0.155538	14.2989	-0.0553694	-0.0355437	G1	Normal	3208	0
834	2188	Normal	Prostate																			HNSCC16_P7_HNSCC16_P7_C07	0.428414	0.247393	0.155899	14.759	-0.00430245	-0.0547654	G1	Normal	2836	0
835	1669	Normal	Prostate																			HNSCC16_P7_HNSCC16_P7_C08	0.435486	0.210108	0.139112	13.4541	-0.0946056	-0.0722365	G1	Normal	2755	0
836	2334	Normal	Prostate																			HNSCC16_P7_HNSCC16_P7_C09	0.445236	0.544258	0.138839	13.1415	-0.0429226	-0.168126	G1	Normal	3123	0
837	2398	Normal	Prostate																			HNSCC16_P7_HNSCC16_P7_C12	0.354369	0.268164	0.114038	12.3147	-0.0756976	-0.0382238	G1	Cancer	4308	0
838	2190	Normal	Prostate																			HNSCC16_P7_HNSCC16_P7_D02	0.443418	0.332776	0.144736	14.088	-0.000341665	0.678417	G2M	Cancer	4942	3.7673
839	2334	Normal	Prostate																			HNSCC16_P7_HNSCC16_P7_D03	0.347145	0.486357	0.128443	12.3245	-0.0347993	-0.115787	G1	Normal	3272	0
84	1624	Normal	Prostate																			HNSCC16_P7_HNSCC16_P7_D04	0.480232	0.306401	0.146423	13.7975	-0.0189758	-0.131995	G1	Cancer	5614	0
840	2032	Normal	Prostate																			HNSCC16_P7_HNSCC16_P7_D08	0.383583	0.175438	0.134326	12.7888	-0.0862332	-0.136433	G1	Cancer	5520	0
841	1184	Normal	Prostate																			HNSCC16_P7_HNSCC16_P7_D11	0.314324	0.453449	0.130146	12.6054	-0.0369762	-0.0310262	G1	Normal	2811	0
842	2060	Normal	Prostate																			HNSCC16_P7_HNSCC16_P7_E01	0.406839	0.498573	0.149491	14.547	-0.0576737	-0.0514327	G1	Normal	3155	0
843	4660	Normal	Prostate																			HNSCC16_P7_HNSCC16_P7_E04	0.379869	0.341054	0.143584	14.261	-0.0975787	-0.0128689	G1	Normal	2882	0
844	1908	Normal	Prostate																			HNSCC16_P7_HNSCC16_P7_E05	0.335613	0.573987	0.132986	12.5066	-0.0718339	-0.156214	G1	Cancer	4770	0
845	2251	Normal	Prostate																			HNSCC16_P7_HNSCC16_P7_E07	0.317727	0.397986	0.121499	11.6579	-0.111776	-0.15255	G1	Cancer	3736	0
846	2138	Normal	Prostate																			HNSCC16_P7_HNSCC16_P7_E09	0.410757	0.186638	0.140171	13.3647	0.714035	0.125256	S	Cancer	5133	1.3912
847	2223	Normal	Prostate																			HNSCC16_P7_HNSCC16_P7_E10	0.608413	0.338214	0.164157	15.4432	0.645807	0.62324	S	Cancer	6959	1.9771
85	1220	Normal	Prostate																			HNSCC16_P7_HNSCC16_P7_F04	0.3164	0.425084	0.129055	12.7248	-0.132151	-0.0902607	G1	Normal	3351	0
86	1398	Normal	Prostate																			HNSCC16_P7_HNSCC16_P7_F11	0.334635	0.260317	0.137346	12.8992	-0.0269529	-0.0408187	G1	Normal	3658	0
87	1530	Normal	Prostate																			HNSCC16_P7_HNSCC16_P7_G07	0.412363	0.296531	0.12416	12.6663	-0.0191228	-0.221155	G1	Normal	5062	0
88	1517	Normal	Prostate																			HNSCC16_P7_HNSCC16_P7_G09	0.374933	0.22848	0.142636	13.3457	-0.0232252	-0.0174016	G1	Normal	4110	0
89	1814	Normal	Prostate																			HNSCC16_P7_HNSCC16_P7_G12	0.377723	0.423009	0.138558	13.4932	-0.0898751	-0.133774	G1	Normal	2685	0
9	1860	Normal	Prostate																			HNSCC16_P7_HNSCC16_P7_H01	0.304776	0.230846	0.115232	11.9696	-0.154128	-0.107907	G1	Cancer	5075	0
90	1627	Normal	Prostate																			HNSCC16_P7_HNSCC16_P7_H02	0.355131	0.561679	0.143151	12.5003	-0.119098	-0.115123	G1	Normal	4763	0
91	1583	Normal	Prostate																			HNSCC16_P7_HNSCC16_P7_H04	0.354241	0.701137	0.135371	12.3118	-0.113657	-0.108259	G1	Cancer	5787	0
913	2016	Normal	Prostate																			HNSCC16_P7_HNSCC16_P7_H08	0.469123	0.377261	0.15553	14.8139	-0.0526185	-0.182894	G1	Normal	4148	0
914	2071	Normal	Prostate																			HNSCC16_P7_HNSCC16_P7_H09	0.427255	0.350482	0.141526	13.3726	0.57042	0.019934	S	Cancer	5697	0
915	1225	Normal	Prostate																			HNSCC16_P9_A01_S193_comb	0.378729	0.449913	0.139382	13.3271	-0.090514	-0.0464804	G1	Normal	3225	0
916	2297	Normal	Prostate																			HNSCC16_P9_A02_S194_comb	0.345197	0.251317	0.129298	12.6985	-0.0779061	-0.0501658	G1	Normal	3401	0
917	3054	Normal	Prostate																			HNSCC16_P9_A06_S198_comb	0.322208	0.163361	0.123254	11.5633	-0.0268224	-0.143935	G1	Normal	3264	0
918	2186	Normal	Prostate																			HNSCC16_P9_A07_S199_comb	0.265044	0.337943	0.122067	11.8157	-0.0260944	-0.0862414	G1	Normal	2872	0
919	2587	Normal	Prostate																			HNSCC16_P9_A09_S201_comb	0.395128	0.288312	0.143447	13.6875	-0.0465834	-0.0535509	G1	Normal	2618	0
92	2213	Normal	Prostate																			HNSCC16_P9_A12_S204_comb	0.310191	0.378215	0.125163	11.9067	-0.047511	-0.161028	G1	Normal	3537	0
920	2367	Normal	Prostate																			HNSCC16_P9_B01_S205_comb	0.394307	0.260285	0.143444	13.8402	-0.0662835	-0.0608688	G1	Normal	2947	0
921	2696	Normal	Prostate																			HNSCC16_P9_B03_S207_comb	0.428248	0.263861	0.144228	13.6734	-0.133376	-0.0142496	G1	Normal	3096	0
922	1733	Normal	Prostate																			HNSCC16_P9_B04_S208_comb	0.371555	0.211282	0.142837	13.9157	-0.124645	-0.134712	G1	Normal	2769	0
923	1693	Normal	Prostate																			HNSCC16_P9_B05_S209_comb	0.360727	0.419166	0.139043	13.0655	-0.0354232	-0.037276	G1	Normal	3408	0
924	2033	Normal	Prostate																			HNSCC16_P9_B06_S210_comb	0.415824	0.316681	0.151439	14.291	-0.142661	-0.0910918	G1	Normal	3828	0
925	2436	Normal	Prostate																			HNSCC16_P9_B08_S212_comb	0.442511	0.268263	0.148609	14.2368	-0.0582778	-0.00414453	G1	Normal	3131	0
926	2491	Normal	Prostate																			HNSCC16_P9_B12_S216_comb	0.281092	0.214637	0.126728	12.1215	-0.038674	-0.0973204	G1	Normal	3057	0
927	1354	Normal	Prostate																			HNSCC16_P9_C04_S220_comb	0.360923	0.4004	0.137671	13.2833	-0.014715	-0.0798406	G1	Normal	3372	0
928	1864	Normal	Prostate																			HNSCC16_P9_C05_S221_comb	0.397444	0.650288	0.144464	13.6286	-0.0143733	-0.0417257	G1	Normal	3030	0
929	1280	Normal	Prostate																			HNSCC16_P9_C06_S222_comb	0.439433	0.749057	0.142019	13.5405	-0.115735	-0.0451566	G1	Normal	3158	0
93	2046	Normal	Prostate																			HNSCC16_P9_C07_S223_comb	0.406166	0.250124	0.142156	13.633	-0.0888672	-0.00585197	G1	Normal	3105	0
930	2667	Normal	Prostate																			HNSCC16_P9_C08_S224_comb	0.340515	0.218839	0.130237	12.5559	-0.039671	-0.0742779	G1	Normal	2960	0
931	2980	Normal	Prostate																			HNSCC16_P9_C10_S226_comb	0.335634	0.279116	0.13621	12.904	-0.0491925	-0.0417677	G1	Normal	3308	0
932	2547	Normal	Prostate																			HNSCC16_P9_D01_S229_comb	0.447392	0.22013	0.160459	14.4685	-0.0837014	-0.0211712	G1	Normal	3375	0
933	2875	Normal	Prostate																			HNSCC16_P9_D06_S234_comb	0.473948	0.220511	0.170631	15.9359	-0.0220569	-0.00778021	G1	Normal	3062	0
934	2536	Normal	Prostate																			HNSCC16_P9_D07_S235_comb	0.310933	0.233691	0.130667	12.1874	-0.0509354	-0.0990806	G1	Normal	2928	0
935	2299	Normal	Prostate																			HNSCC16_P9_D10_S238_comb	0.31517	0.213999	0.132788	12.8145	-0.0916985	-0.0672823	G1	Normal	2737	0
936	2082	Normal	Prostate																			HNSCC16_P9_E02_S242_comb	0.341931	0.214441	0.135762	13.4415	-0.131672	-0.0268033	G1	Normal	2275	0
937	1902	Normal	Prostate																			HNSCC16_P9_E03_S243_comb	0.369227	0.294461	0.138108	13.7068	-0.054453	-0.0260355	G1	Normal	3242	0
938	2036	Normal	Prostate																			HNSCC16_P9_E06_S246_comb	0.385729	0.295946	0.13683	13.3861	-0.100441	-0.0645921	G1	Normal	3572	0
939	2328	Normal	Prostate																			HNSCC16_P9_E07_S247_comb	0.399541	0.249303	0.145159	14.0303	-0.131979	-0.0258968	G1	Normal	2708	0
94	1758	Normal	Prostate																			HNSCC16_P9_E08_S248_comb	0.385408	0.608212	0.129287	12.8148	-0.0909936	-0.107476	G1	Normal	3959	0
940	3122	Normal	Prostate																			HNSCC16_P9_E09_S249_comb	0.375918	0.277461	0.140037	13.1612	-0.161995	-0.0715268	G1	Normal	3308	0
941	2406	Normal	Prostate																			HNSCC16_P9_E10_S250_comb	0.372923	0.252662	0.126595	12.3091	-0.0968625	-0.148429	G1	Normal	3410	0
942	2970	Normal	Prostate																			HNSCC16_P9_E12_S252_comb	0.353723	0.232601	0.133367	12.6773	-0.0622735	-0.0689312	G1	Normal	3668	0
943	1943	Normal	Prostate																			HNSCC16_P9_F01_S253_comb	0.436188	0.263097	0.156172	15.0781	-0.0106699	-0.00304032	G1	Normal	2703	0
944	1393	Normal	Prostate																			HNSCC16_P9_F04_S256_comb	0.283843	0.164717	0.120539	11.7862	-0.0279202	-0.0331208	G1	Normal	2703	0
945	2354	Normal	Prostate																			HNSCC16_P9_F05_S257_comb	0.37063	0.305212	0.13324	13.1102	-0.187455	-0.0833704	G1	Normal	3500	0
946	2764	Normal	Prostate																			HNSCC16_P9_F06_S258_comb	0.371943	0.343469	0.138305	13.1372	-0.062579	-0.129555	G1	Normal	3858	0
947	3088	Normal	Prostate																			HNSCC16_P9_F08_S260_comb	0.321515	0.465441	0.137441	13.1523	-0.00567611	-0.00351745	G1	Normal	2941	0
948	2178	Normal	Prostate																			HNSCC16_P9_F09_S261_comb	0.359866	0.252818	0.147298	13.994	-0.0854528	-0.00881906	G1	Normal	2872	0
949	3134	Normal	Prostate																			HNSCC16_P9_G01_S265_comb	0.392231	0.261477	0.136088	12.9718	-0.0954114	-0.0230948	G1	Normal	3065	0
95	2067	Normal	Prostate																			HNSCC16_P9_G04_S268_comb	0.444824	0.197264	0.15738	15.143	-0.0102404	-0.0485717	G1	Normal	2515	0
950	2254	Normal	Prostate																			HNSCC16_P9_G05_S269_comb	0.246095	0.392849	0.124552	12.1971	-0.059926	-0.00851679	G1	Normal	2629	0
951	2710	Normal	Prostate																			HNSCC16_P9_G07_S271_comb	0.439724	0.25367	0.1464	14.2017	-0.0673975	-0.08543	G1	Normal	2979	0
952	1419	Normal	Prostate																			HNSCC16_P9_G08_S272_comb	0.359243	0.448005	0.126452	12.3767	-0.119793	-0.131982	G1	Normal	4943	0
953	2203	Normal	Prostate																			HNSCC16_P9_G09_S273_comb	0.375357	0.219028	0.131665	13.0699	-0.0800284	-0.0419667	G1	Normal	2589	0
954	2551	Normal	Prostate																			HNSCC16_P9_G11_S275_comb	0.408095	0.431961	0.142949	13.1947	-0.0807209	-0.0519994	G1	Normal	4663	0
955	2911	Normal	Prostate																			HNSCC16_P9_H01_S277_comb	0.300917	0.210836	0.123856	12.0767	-0.065594	-0.0905386	G1	Normal	2632	0
956	2860	Normal	Prostate																			HNSCC16_P9_H02_S278_comb	0.24432	0.219003	0.121452	11.2283	-0.133124	-0.169081	G1	Normal	3318	0
957	2748	Normal	Prostate																			HNSCC16_P9_H04_S280_comb	0.401898	0.412605	0.144946	13.1866	-0.200432	-0.196098	G1	Normal	4585	0
958	2247	Normal	Prostate																			HNSCC16_P9_H05_S281_comb	0.380568	0.527789	0.144219	12.9396	-0.155961	-0.135462	G1	Normal	5458	0
959	2311	Normal	Prostate																			HNSCC16_P9_H06_S282_comb	0.36319	0.367495	0.127263	12.7229	-0.123417	-0.0969111	G1	Normal	4036	0
96	779	Normal	Prostate																			HNSCC16_P9_H07_S283_comb	0.339163	0.417488	0.132721	12.3548	-0.166939	-0.101134	G1	Normal	4951	0
960	2069	Normal	Prostate																			HNSCC16_P9_H08_S284_comb	0.350619	0.52444	0.132272	12.2976	-0.105687	-0.212844	G1	Normal	5870	0.017209
961	2740	Normal	Prostate																			HNSCC16_P9_H10_S286_comb	0.323779	0.273991	0.135074	12.0085	-0.14191	-0.0781308	G1	Normal	3975	0
962	2422	Normal	Prostate																			HNSCC17_P1_HNSCC17_P1_A02	0.364041	0.490463	0.13986	12.8214	-0.0789098	-0.139277	G1	Cancer	5294	0
963	2342	Normal	Prostate																			HNSCC17_P1_HNSCC17_P1_A03	0.401486	0.69281	0.14499	12.8231	-0.055477	-0.178806	G1	Cancer	6070	0
964	4416	Normal	Prostate																			HNSCC17_P1_HNSCC17_P1_A04	0.383972	0.630978	0.136053	12.6071	-0.0399771	-0.160969	G1	Cancer	5699	0
965	2559	Normal	Prostate																			HNSCC17_P1_HNSCC17_P1_A05	0.355601	0.202948	0.11808	13.1745	-0.0557155	-0.1494	G1	Cancer	4260	0
966	1829	Normal	Prostate																			HNSCC17_P1_HNSCC17_P1_A07	0.380468	0.614791	0.125434	12.8848	-0.0251351	-0.111927	G1	Cancer	4866	0
967	2751	Normal	Prostate																			HNSCC17_P1_HNSCC17_P1_A12	0.380686	0.424803	0.138248	13.2437	-0.00658142	-0.0864192	G1	Cancer	5320	0
968	2918	Normal	Prostate																			HNSCC17_P1_HNSCC17_P1_B01	0.36942	0.58243	0.13419	12.5689	-0.129104	-0.123584	G1	Cancer	5957	0.42331
969	2677	Normal	Prostate																			HNSCC17_P1_HNSCC17_P1_B02	0.440796	0.412768	0.137594	13.4389	0.510124	-0.000311981	S	Cancer	6318	0
97	1790	Normal	Prostate																			HNSCC17_P1_HNSCC17_P1_B03	0.385248	0.502201	0.133046	12.9304	-0.154589	-0.0676935	G1	Cancer	3781	0
970	2343	Normal	Prostate																			HNSCC17_P1_HNSCC17_P1_B04	0.332204	0.500463	0.132289	12.3999	-0.0470756	-0.135328	G1	Cancer	5655	0
971	2458	Normal	Prostate																			HNSCC17_P1_HNSCC17_P1_B05	0.318069	0.490359	0.114735	12.2319	-0.127539	-0.0624917	G1	Cancer	3745	0
972	2476	Normal	Prostate																			HNSCC17_P1_HNSCC17_P1_B07	0.354075	0.603308	0.122875	12.5618	-0.0474123	-0.147791	G1	Cancer	5301	0
973	2420	Normal	Prostate																			HNSCC17_P1_HNSCC17_P1_B08	0.332859	0.524366	0.127826	12.2074	-0.135178	-0.105802	G1	Cancer	5749	0
974	2372	Normal	Prostate																			HNSCC17_P1_HNSCC17_P1_B10	0.596158	0.655017	0.159057	15.4642	0.692041	0.412166	S	Cancer	6458	1.9392
975	1983	Normal	Prostate																			HNSCC17_P1_HNSCC17_P1_C01	0.328264	0.496615	0.13061	12.2182	-0.206038	-0.0801991	G1	Cancer	5792	0.031395
976	2419	Normal	Prostate																			HNSCC17_P1_HNSCC17_P1_C07	0.341065	0.494983	0.128875	11.9305	-0.184284	-0.162457	G1	Cancer	7038	0
977	2139	Normal	Prostate																			HNSCC17_P1_HNSCC17_P1_C09	0.378549	0.604931	0.132582	12.7935	-0.190712	-0.12531	G1	Cancer	5440	0
978	1889	Normal	Prostate																			HNSCC17_P1_HNSCC17_P1_C10	0.49487	0.531338	0.161642	15.1008	0.0921143	0.594013	G2M	Cancer	4842	0
979	2563	Normal	Prostate																			HNSCC17_P1_HNSCC17_P1_D03	0.462025	0.579825	0.153479	14.4494	-0.140595	-0.106212	G1	Normal	3277	0
98	1771	Normal	Prostate																			HNSCC17_P1_HNSCC17_P1_D05	0.35256	0.443361	0.142886	12.5875	-0.116186	-0.150012	G1	Cancer	5137	0
980	1640	Normal	Prostate																			HNSCC17_P1_HNSCC17_P1_D07	0.505775	0.577776	0.166661	14.2648	0.0946928	0.812221	G2M	Cancer	7083	2.1483
981	2206	Normal	Prostate																			HNSCC17_P1_HNSCC17_P1_D08	0.384258	0.508034	0.14594	12.6634	-0.0667087	-0.154529	G1	Cancer	5451	0
982	3061	Normal	Prostate																			HNSCC17_P1_HNSCC17_P1_E01	0.327551	0.528522	0.129798	12.5358	-0.0937795	-0.038859	G1	Cancer	4506	0
983	1984	Normal	Prostate																			HNSCC17_P1_HNSCC17_P1_E02	0.393481	0.536443	0.142632	13.0307	-0.0962462	-0.101902	G1	Cancer	5248	0
984	1954	Normal	Prostate																			HNSCC17_P1_HNSCC17_P1_E04	0.494576	0.690324	0.157225	14.5519	0.0858916	0.515222	G2M	Cancer	6058	0.10568
985	2098	Normal	Prostate																			HNSCC17_P1_HNSCC17_P1_E05	0.336829	0.80118	0.126114	12.3733	-0.215972	-0.166548	G1	Cancer	5608	0
986	1769	Normal	Prostate																			HNSCC17_P1_HNSCC17_P1_E06	0.3884	0.385071	0.133256	13.0341	-0.0507648	-0.0768609	G1	Cancer	5401	0
987	1867	Normal	Prostate																			HNSCC17_P1_HNSCC17_P1_E07	0.375031	0.717931	0.129271	12.5902	-0.101731	-0.131324	G1	Cancer	5399	0
988	4284	Normal	Prostate																			HNSCC17_P1_HNSCC17_P1_E09	0.568721	0.495722	0.174436	15.0402	0.0837205	0.902599	G2M	Cancer	6964	2.4908
989	2095	Normal	Prostate																			HNSCC17_P1_HNSCC17_P1_F03	0.360752	0.800168	0.119792	12.1006	-0.108952	-0.12915	G1	Cancer	5277	0
99	2034	Normal	Prostate																			HNSCC17_P1_HNSCC17_P1_F07	0.525828	0.621351	0.160413	14.9192	0.264175	0.61861	G2M	Cancer	6544	2.4631
990	2675	Normal	Prostate																			HNSCC17_P1_HNSCC17_P1_F09	0.3121	0.541249	0.129671	11.9922	-0.153923	-0.0992974	G1	Cancer	4892	0
991	2279	Normal	Prostate																			HNSCC17_P1_HNSCC17_P1_F10	0.385891	0.583447	0.133276	12.9423	-0.0838442	-0.108343	G1	Cancer	4811	0
992	4296	Normal	Prostate																			HNSCC17_P1_HNSCC17_P1_F12	0.437762	0.41086	0.144763	14.0306	-0.00513088	0.518557	G2M	Cancer	4375	4.0475
993	2367	Normal	Prostate																			HNSCC17_P1_HNSCC17_P1_G01	0.385362	0.462704	0.141713	12.7221	-0.103502	-0.140296	G1	Cancer	6835	0
994	1627	Normal	Prostate																			HNSCC17_P1_HNSCC17_P1_G02	0.283109	0.719923	0.117008	11.7184	-0.108822	-0.0637057	G1	Normal	2114	0
995	2392	Normal	Prostate																			HNSCC17_P1_HNSCC17_P1_G03	0.372723	0.734855	0.137533	12.5046	-0.0642314	-0.119846	G1	Cancer	6670	0
996	2032	Normal	Prostate																			HNSCC17_P1_HNSCC17_P1_G04	0.364569	0.541508	0.137444	12.5387	-0.104267	-0.196288	G1	Cancer	4883	0
997	3332	Normal	Prostate																			HNSCC17_P1_HNSCC17_P1_G06	0.410972	0.561677	0.137388	13.5763	-0.145467	-0.128073	G1	Cancer	5281	0
998	3413	Normal	Prostate																			HNSCC17_P1_HNSCC17_P1_G07	0.508	0.541189	0.149345	14.4538	0.665863	0.129909	S	Cancer	6465	2.0451
999	1601	Normal	Prostate																			HNSCC17_P1_HNSCC17_P1_H01	0.545778	0.645757	0.173721	15.4258	0.0594391	0.825718	G2M	Cancer	6009	1.4673
0	1890	Tumor	Prostate																			HNSCC17_P1_HNSCC17_P1_H02	0.3455	0.609597	0.125604	12.4763	-0.123019	-0.0675581	G1	Cancer	4537	0
1002	4340	Tumor	Prostate																			HNSCC17_P1_HNSCC17_P1_H03	0.511865	0.575717	0.152473	14.0858	0.641085	0.225092	S	Cancer	7379	1.0079
1003	2573	Tumor	Prostate																			HNSCC17_P1_HNSCC17_P1_H06	0.344581	0.499114	0.123101	12.0842	-0.136428	-0.0707962	G1	Cancer	5687	0
1004	5988	Tumor	Prostate																			HNSCC17_P1_HNSCC17_P1_H07	0.48488	0.508748	0.153619	14.2936	0.64629	0.177341	S	Cancer	5917	2.3039
1005	1917	Tumor	Prostate																			HNSCC17_P1_HNSCC17_P1_H08	0.396179	0.630271	0.141244	12.801	-0.0604054	-0.102745	G1	Cancer	5397	0
1006	3088	Tumor	Prostate																			HNSCC17_P1_HNSCC17_P1_H09	0.439713	0.651862	0.145439	13.5268	0.0179024	0.539169	G2M	Cancer	6209	1.7744
1007	3183	Tumor	Prostate																			HNSCC17_P1_HNSCC17_P1_H10	0.420123	0.841805	0.138269	13.2147	-0.0204677	-0.0291915	G1	Cancer	6008	0
1008	1134	Tumor	Prostate																			HNSCC17_P1_HNSCC17_P1_H12	0.519603	0.525004	0.14961	14.4802	0.061349	0.688191	G2M	Cancer	6722	2.6853
1009	2753	Tumor	Prostate																			HNSCC17_P13_A01_S289_comb	0.227131	0.274818	0.122116	13.4146	-0.0204204	-0.0600832	G1	Normal	2735	0
1010	3194	Tumor	Prostate																			HNSCC17_P13_B01_S301_comb	0.23629	0.167213	0.111638	11.1095	-0.0650844	-0.0843334	G1	Normal	2392	0
1011	2671	Tumor	Prostate																			HNSCC17_P13_B03_S303_comb	0.330563	0.505903	0.147678	14.3509	-0.0884841	-0.103552	G1	Normal	3148	0
1012	1024	Tumor	Prostate																			HNSCC17_P13_D03_S327_comb	0.32155	0.242679	0.126309	12.562	-0.0450696	-0.115063	G1	Normal	3185	0
1013	4771	Tumor	Prostate																			HNSCC17_P13_E02_S338_comb	0.223137	0.786509	0.110801	10.9847	-0.114271	-0.105876	G1	Normal	2653	0
1014	2453	Tumor	Prostate																			HNSCC17_P13_E04_S340_comb	0.314831	0.184891	0.111885	11.1813	-0.0157813	-0.0576447	G1	Normal	2609	0
1015	2204	Tumor	Prostate																			HNSCC17_P13_E12_S348_comb	0.231205	0.161098	0.119061	11.7841	-0.080132	-0.0647968	G1	Normal	3075	0
1016	4289	Tumor	Prostate																			HNSCC17_P13_F10_S358_comb	0.292347	0.140176	0.124929	13.1855	-0.0156851	-0.0530681	G1	Normal	2523	0
1017	3277	Tumor	Prostate																			HNSCC17_P13_F11_S359_comb	0.236739	0.160763	0.108695	10.8482	-0.0833925	-0.0521241	G1	Normal	2604	0
1018	2103	Tumor	Prostate																			HNSCC17_P13_G01_S361_comb	0.261821	0.211295	0.121123	11.9143	-0.102415	-0.0317995	G1	Normal	2722	0
1019	2801	Tumor	Prostate																			HNSCC17_P13_G10_S370_comb	0.319421	0.164433	0.1303	13.4409	-0.00454785	-0.0670619	G1	Normal	2608	0
1020	2049	Tumor	Prostate																			HNSCC17_P13_G12_S372_comb	0.30073	0.184593	0.117903	11.7786	-0.0531793	-0.0579194	G1	Normal	2396	0
1021	2944	Tumor	Prostate																			HNSCC17_P13_H10_S382_comb	0.241514	0.187831	0.120918	12.9879	-0.0662358	-0.0794529	G1	Normal	2717	0
1022	928	Tumor	Prostate																			HNSCC17_P2_A02_S2_comb	0.352126	0.303603	0.11517	12.5992	-0.0764905	-0.167793	G1	Cancer	5101	0
1023	3180	Tumor	Prostate																			HNSCC17_P2_A03_S3_comb	0.393421	0.341282	0.142589	12.4944	-0.236219	-0.186934	G1	Cancer	6801	0
1103	2144	Tumor	Prostate																			HNSCC17_P2_A05_S5_comb	0.364951	0.425728	0.131997	12.8446	-0.0879429	-0.123891	G1	Cancer	4263	0
1104	3797	Tumor	Prostate																			HNSCC17_P2_A06_S6_comb	0.351592	0.539825	0.129548	12.0633	-0.0803067	-0.179153	G1	Cancer	5993	0
1105	539	Tumor	Prostate																			HNSCC17_P2_A08_S8_comb	0.352414	0.27869	0.120879	12.7179	-0.0776143	-0.132817	G1	Cancer	5251	0
1106	3787	Tumor	Prostate																			HNSCC17_P2_A11_S11_comb	0.515613	0.771926	0.164861	14.5738	0.128664	0.680288	G2M	Cancer	6527	1.8111
1107	3646	Tumor	Prostate																			HNSCC17_P2_B04_S16_comb	0.355296	0.197389	0.134003	12.2944	-0.126935	-0.148683	G1	Cancer	5699	0
1108	3117	Tumor	Prostate																			HNSCC17_P2_B07_S19_comb	0.501263	0.516305	0.168191	15.4774	0.0470876	0.683882	G2M	Cancer	3949	0
1109	3206	Tumor	Prostate																			HNSCC17_P2_C03_S27_comb	0.378724	0.511699	0.129615	12.4129	-0.14704	-0.156073	G1	Cancer	6109	0
1110	3871	Tumor	Prostate																			HNSCC17_P2_C04_S28_comb	0.361999	0.283163	0.117516	12.0023	-0.102244	-0.128282	G1	Cancer	6855	0
1111	515	Tumor	Prostate																			HNSCC17_P2_C05_S29_comb	0.383337	0.251118	0.145283	12.6443	-0.0298225	-0.125605	G1	Cancer	6778	1.0072
1112	4621	Tumor	Prostate																			HNSCC17_P2_C06_S30_comb	0.33841	0.406413	0.124023	12.7408	-0.0179103	-0.161047	G1	Cancer	3982	0
1113	3481	Tumor	Prostate																			HNSCC17_P2_C10_S34_comb	0.549076	0.225647	0.156126	14.522	0.721892	0.370953	S	Cancer	7424	0
1114	1623	Tumor	Prostate																			HNSCC17_P2_C11_S35_comb	0.35844	0.486683	0.126257	12.4648	-0.0654072	-0.0638014	G1	Cancer	5403	0
1115	4681	Tumor	Prostate																			HNSCC17_P2_D01_S37_comb	0.390235	0.576519	0.144915	12.838	-0.0872028	-0.110121	G1	Cancer	5748	0
1116	2616	Tumor	Prostate																			HNSCC17_P2_D03_S39_comb	0.407187	0.2664	0.140181	12.7306	-0.136305	-0.0813775	G1	Cancer	7224	0
1117	3352	Tumor	Prostate																			HNSCC17_P2_D05_S41_comb	0.341363	0.296501	0.139283	13.035	-0.132079	-0.0498422	G1	Cancer	4971	0
1118	5395	Tumor	Prostate																			HNSCC17_P2_D06_S42_comb	0.479211	0.724985	0.161208	14.4221	-0.0425712	0.605593	G2M	Cancer	5759	2.2366
1119	751	Tumor	Prostate																			HNSCC17_P2_D07_S43_comb	0.525236	0.763037	0.167475	14.882	0.0777676	0.849139	G2M	Cancer	6145	3.3014
1120	4137	Tumor	Prostate																			HNSCC17_P2_D09_S45_comb	0.396991	0.351906	0.138242	12.9491	-0.0390094	-0.126753	G1	Cancer	5303	0.24367
1121	2026	Tumor	Prostate																			HNSCC17_P2_D10_S46_comb	0.351273	0.31092	0.135094	12.2747	-0.146337	-0.15861	G1	Cancer	5932	0
1122	4074	Tumor	Prostate																			HNSCC17_P2_E01_S49_comb	0.397513	0.206707	0.139185	12.7687	-0.132563	-0.141476	G1	Cancer	5389	0
1123	4379	Tumor	Prostate																			HNSCC17_P2_E02_S50_comb	0.354121	0.506268	0.134044	12.4189	-0.219396	-0.0308214	G1	Cancer	5230	0
1124	4438	Tumor	Prostate																			HNSCC17_P2_E04_S52_comb	0.205465	0.21146	0.112526	11.9472	-0.0683667	-0.0637461	G1	Cancer	2541	0
1125	4730	Tumor	Prostate																			HNSCC17_P2_E08_S56_comb	0.434432	0.318238	0.145086	14.3	-0.0291959	-0.0797541	G1	Normal	2820	0
1126	4319	Tumor	Prostate																			HNSCC17_P2_E09_S57_comb	0.39523	0.262771	0.129069	12.9628	-0.0678016	-0.106572	G1	Cancer	5388	0
1127	2733	Tumor	Prostate																			HNSCC17_P2_E11_S59_comb	0.384337	0.484008	0.143515	13.2449	-0.0752783	-0.0883669	G1	Cancer	4234	0
1128	1242	Tumor	Prostate																			HNSCC17_P2_E12_S60_comb	0.351	0.317548	0.135082	12.7076	-0.0889774	-0.0982581	G1	Cancer	5537	1.5675
1129	2366	Tumor	Prostate																			HNSCC17_P2_F01_S61_comb	0.368356	0.505211	0.123242	12.2777	-0.219283	-0.100862	G1	Cancer	6109	0
1130	3562	Tumor	Prostate																			HNSCC17_P2_F03_S63_comb	0.364988	0.278274	0.133592	12.5333	-0.171194	-0.174662	G1	Cancer	5087	0
1131	4062	Tumor	Prostate																			HNSCC17_P2_F04_S64_comb	0.413942	0.849368	0.148794	13.6049	-0.11009	-0.026624	G1	Normal	3180	0
1132	1793	Tumor	Prostate																			HNSCC17_P2_F06_S66_comb	0.448228	0.769952	0.139237	13.6998	0.549574	0.115575	S	Cancer	6686	0
1133	4267	Tumor	Prostate																			HNSCC17_P2_F08_S68_comb	0.280983	0.382009	0.117506	11.9052	-0.167501	-0.065433	G1	Cancer	4005	0
1134	3574	Tumor	Prostate																			HNSCC17_P2_F11_S71_comb	0.484954	0.708368	0.143661	14.4722	0.316225	0.629078	G2M	Cancer	5602	2.6281
1135	3238	Tumor	Prostate																			HNSCC17_P2_F12_S72_comb	0.464774	0.202812	0.154046	14.7271	0.142213	0.867618	G2M	Cancer	5368	3.7305
1136	2738	Tumor	Prostate																			HNSCC17_P2_G02_S74_comb	0.384829	0.470013	0.128764	12.2444	-0.0651565	-0.157606	G1	Cancer	6665	0
1137	1079	Tumor	Prostate																			HNSCC17_P2_G04_S76_comb	0.368472	0.182596	0.1316	12.4491	-0.132922	-0.130011	G1	Cancer	5754	0
1138	3887	Tumor	Prostate																			HNSCC17_P2_G07_S79_comb	0.539813	0.861357	0.161527	14.7567	0.681541	0.117551	S	Cancer	6859	2.1699
1139	3722	Tumor	Prostate																			HNSCC17_P2_G09_S81_comb	0.42147	0.607434	0.142567	13.5526	-0.141623	-0.109558	G1	Cancer	5485	0
1140	3454	Tumor	Prostate																			HNSCC17_P2_G10_S82_comb	0.386671	0.565027	0.128067	12.8328	-0.107203	-0.172259	G1	Cancer	5451	0
1141	4259	Tumor	Prostate																			HNSCC17_P2_G12_S84_comb	0.492775	0.231803	0.151497	13.9834	0.507596	0.0569183	S	Cancer	6898	0
1142	2265	Tumor	Prostate																			HNSCC17_P2_H01_S85_comb	0.414688	0.30462	0.15171	12.8506	-0.135379	-0.160784	G1	Cancer	6357	0
1143	2331	Tumor	Prostate																			HNSCC17_P2_H02_S86_comb	0.441736	0.215465	0.139467	14.0717	0.55641	0.133084	S	Cancer	5674	0.30685
1144	2942	Tumor	Prostate																			HNSCC17_P2_H03_S87_comb	0.402713	0.60031	0.145533	13.0554	-0.0621901	-0.12615	G1	Cancer	6111	0
1145	4695	Tumor	Prostate																			HNSCC17_P2_H04_S88_comb	0.388319	0.268591	0.12846	12.6777	-0.0358762	-0.123884	G1	Cancer	5622	0
1146	3782	Tumor	Prostate																			HNSCC17_P2_H06_S90_comb	0.589673	0.306877	0.194477	15.4777	0.0763622	0.765125	G2M	Cancer	6541	2.7253
1147	3019	Tumor	Prostate																			HNSCC17_P2_H07_S91_comb	0.372912	0.634621	0.129002	12.1325	-0.1009	-0.112154	G1	Cancer	7473	0
1148	3311	Tumor	Prostate																			HNSCC17_P3_A02_S194_comb	0.394038	0.283539	0.13589	13.4045	-0.158035	-0.0442525	G1	Normal	3712	0
1149	2684	Tumor	Prostate																			HNSCC17_P3_A06_S198_comb	0.38402	0.287567	0.132469	12.4737	-0.126978	-0.0741577	G1	Cancer	5780	0
1150	3307	Tumor	Prostate																			HNSCC17_P3_A08_S200_comb	0.416882	0.361666	0.131027	13.0746	-0.0702591	-0.123924	G1	Cancer	5225	0
1151	1987	Tumor	Prostate																			HNSCC17_P3_A09_S201_comb	0.385456	0.5187	0.138161	13.1375	-0.0346264	-0.12116	G1	Cancer	5151	0
1152	4124	Tumor	Prostate																			HNSCC17_P3_A10_S202_comb	0.326809	0.530556	0.132318	12.0296	-0.170297	-0.181738	G1	Cancer	5790	0
1153	3601	Tumor	Prostate																			HNSCC17_P3_A11_S203_comb	0.599976	0.888777	0.192371	15.3754	0.0682591	0.910731	G2M	Cancer	7058	2.6434
1154	5332	Tumor	Prostate																			HNSCC17_P3_A12_S204_comb	0.341377	0.548257	0.126455	12.143	-0.139049	-0.15182	G1	Cancer	5893	0
1155	2838	Tumor	Prostate																			HNSCC17_P3_B03_S207_comb	0.51549	0.728771	0.163888	14.7432	0.183996	0.662807	G2M	Cancer	6185	0.27858
1156	2194	Tumor	Prostate																			HNSCC17_P3_B06_S210_comb	0.569644	0.547242	0.186612	15.1774	0.096454	0.859085	G2M	Cancer	6943	2.4766
1157	5364	Tumor	Prostate																			HNSCC17_P3_B10_S214_comb	0.326865	0.514136	0.131982	12.3044	-0.100106	-0.0846651	G1	Cancer	5163	0.73725
1158	5411	Tumor	Prostate																			HNSCC17_P3_B12_S216_comb	0.543772	0.388732	0.157344	14.4952	0.708685	0.302399	S	Cancer	7209	0
1159	5303	Tumor	Prostate																			HNSCC17_P3_C03_S219_comb	0.488308	0.556935	0.161034	13.931	0.0291605	0.528534	G2M	Cancer	6781	2.5011
1160	3146	Tumor	Prostate																			HNSCC17_P3_C04_S220_comb	0.383964	0.523264	0.145831	12.9205	-0.167503	-0.136292	G1	Cancer	5142	0
1161	4213	Tumor	Prostate																			HNSCC17_P3_C05_S221_comb	0.37387	0.545397	0.135928	12.8547	-0.00642688	-0.205465	G1	Cancer	5385	0
1162	3584	Tumor	Prostate																			HNSCC17_P3_C07_S223_comb	0.346977	0.444738	0.136466	12.3824	-0.135661	-0.123692	G1	Cancer	5920	0
1163	1938	Tumor	Prostate																			HNSCC17_P3_C08_S224_comb	0.334409	0.612399	0.139901	12.4343	-0.145309	-0.0927044	G1	Cancer	6279	0
1164	3712	Tumor	Prostate																			HNSCC17_P3_C09_S225_comb	0.356259	0.535673	0.134311	12.3995	-0.104669	-0.0644681	G1	Cancer	5696	0
1165	3493	Tumor	Prostate																			HNSCC17_P3_C11_S227_comb	0.37008	0.594984	0.139357	12.5909	-0.144496	-0.149362	G1	Cancer	6233	0
1166	3779	Tumor	Prostate																			HNSCC17_P3_D01_S229_comb	0.363669	0.644789	0.143507	12.7524	-0.0805399	-0.0875398	G1	Cancer	6407	0
1167	977	Tumor	Prostate																			HNSCC17_P3_D02_S230_comb	0.34016	0.545052	0.124209	12.0631	-0.194708	-0.118752	G1	Cancer	6017	0
1168	3518	Tumor	Prostate																			HNSCC17_P3_D03_S231_comb	0.421172	0.699872	0.135422	12.6379	-0.110062	-0.0741633	G1	Cancer	8057	0
1170	4884	Tumor	Prostate																			HNSCC17_P3_D04_S232_comb	0.357223	0.502911	0.137375	13.1111	-0.0181812	-0.0700528	G1	Cancer	4587	0
1171	889	Tumor	Prostate																			HNSCC17_P3_D06_S234_comb	0.403494	0.618834	0.143317	12.9992	-0.165462	-0.0675258	G1	Cancer	6185	0
1172	2543	Tumor	Prostate																			HNSCC17_P3_D07_S235_comb	0.387263	0.515728	0.126261	12.4588	-0.00806206	-0.155893	G1	Cancer	5651	0
1173	4413	Tumor	Prostate																			HNSCC17_P3_D08_S236_comb	0.525079	0.500147	0.159666	14.4708	0.637765	0.19014	S	Cancer	7255	0.52807
1174	4536	Tumor	Prostate																			HNSCC17_P3_D12_S240_comb	0.374097	0.534181	0.135705	12.6665	-0.0584718	-9.64461e-05	G1	Cancer	4425	0
1200	1672	Tumor	Prostate																			HNSCC17_P3_E02_S242_comb	0.44647	0.214371	0.155071	14.1119	0.259595	0.538554	G2M	Cancer	5964	2.5298
1201	1125	Tumor	Prostate																			HNSCC17_P3_E04_S244_comb	0.344157	0.49792	0.130947	12.8022	-0.108634	-0.107747	G1	Cancer	4791	0
1202	2272	Tumor	Prostate																			HNSCC17_P3_E05_S245_comb	0.427115	0.248593	0.161198	14.1788	0.105263	0.816316	G2M	Cancer	4655	5.5332
1203	1513	Tumor	Prostate																			HNSCC17_P3_E06_S246_comb	0.366673	0.564281	0.144839	13.011	-0.0816645	-0.0625368	G1	Cancer	5270	0
1204	2557	Tumor	Prostate																			HNSCC17_P3_E07_S247_comb	0.383299	0.589868	0.136312	12.7657	-0.164848	-0.166281	G1	Cancer	5923	0
1205	1583	Tumor	Prostate																			HNSCC17_P3_E08_S248_comb	0.49561	0.685165	0.157787	14.6764	-0.023117	0.766794	G2M	Cancer	5650	3.7755
1206	1853	Tumor	Prostate																			HNSCC17_P3_E11_S251_comb	0.376484	0.59553	0.136187	13.0649	-0.10354	-0.0895023	G1	Cancer	5553	0
1207	1527	Tumor	Prostate																			HNSCC17_P3_F03_S255_comb	0.396508	0.455109	0.136069	12.7749	-0.14384	-0.165868	G1	Cancer	5014	0
1208	1678	Tumor	Prostate																			HNSCC17_P3_F05_S257_comb	0.508726	0.539504	0.156442	14.2677	0.561665	0.209145	S	Cancer	7240	0
1209	2933	Tumor	Prostate																			HNSCC17_P3_F06_S258_comb	0.546488	0.815494	0.156398	14.7822	0.515226	0.386232	S	Cancer	6608	0
1210	2172	Tumor	Prostate																			HNSCC17_P3_F08_S260_comb	0.340537	0.483966	0.136919	12.9135	-0.121385	-0.0421896	G1	Cancer	4414	0
1211	2188	Tumor	Prostate																			HNSCC17_P3_F09_S261_comb	0.497754	0.814972	0.155447	14.2516	0.612084	0.230946	S	Cancer	6854	0.77231
1212	1298	Tumor	Prostate																			HNSCC17_P3_F11_S263_comb	0.400563	0.175086	0.141811	13.1505	-0.136255	-0.128997	G1	Cancer	5102	0
1213	1893	Tumor	Prostate																			HNSCC17_P3_F12_S264_comb	0.324991	0.20618	0.12813	12.0424	-0.143367	-0.141938	G1	Cancer	5796	0
1214	838	Tumor	Prostate																			HNSCC17_P3_G06_S270_comb	0.346745	0.181231	0.132044	12.8649	-0.169578	-0.0973546	G1	Cancer	4383	0
1215	2586	Tumor	Prostate																			HNSCC17_P3_G08_S272_comb	0.390333	0.516313	0.140485	13.2257	-0.0333778	-0.0663935	G1	Cancer	4553	0
1216	1815	Tumor	Prostate																			HNSCC17_P3_G10_S274_comb	0.287587	0.481179	0.122597	11.8528	-0.165784	-0.166964	G1	Cancer	4375	0
1217	2441	Tumor	Prostate																			HNSCC17_P3_G12_S276_comb	0.362191	0.462343	0.127112	12.4852	-0.104851	-0.164124	G1	Cancer	4738	0
1218	1998	Tumor	Prostate																			HNSCC17_P3_H05_S281_comb	0.33408	0.25841	0.126004	12.2337	-0.0675393	-0.12449	G1	Cancer	5164	0
1219	2128	Tumor	Prostate																			HNSCC17_P3_H06_S282_comb	0.344641	0.199558	0.129672	12.8486	-0.101056	-0.11107	G1	Normal	3023	0
1220	3785	Tumor	Prostate																			HNSCC17_P3_H11_S287_comb	0.469462	0.781636	0.16768	14.5431	0.0877792	0.741844	G2M	Cancer	6158	2.899
1221	4086	Tumor	Prostate																			HNSCC17_P4_A04_S100_comb	0.357395	0.62808	0.129239	12.7632	-0.0605726	-0.0775285	G1	Cancer	5646	0
1222	508	Tumor	Prostate																			HNSCC17_P4_A06_S102_comb	0.363311	0.795907	0.131577	12.6231	-0.0904915	-0.0820483	G1	Cancer	5526	0
1223	2425	Tumor	Prostate																			HNSCC17_P4_A07_S103_comb	0.373804	0.782595	0.142909	12.6671	-0.129512	-0.0658225	G1	Cancer	6727	0
1224	1788	Tumor	Prostate																			HNSCC17_P4_A08_S104_comb	0.533984	0.539001	0.156995	14.7782	0.516482	0.522853	G2M	Cancer	6775	2.8728
1225	1787	Tumor	Prostate																			HNSCC17_P4_A09_S105_comb	0.550464	0.529123	0.150671	14.5059	0.541692	0.230424	S	Cancer	7317	0.085425
1266	2261	Tumor	Prostate																			HNSCC17_P4_A10_S106_comb	0.433022	0.674451	0.128006	13.2924	-0.00731474	-0.0480554	G1	Cancer	6121	0
1267	1784	Tumor	Prostate																			HNSCC17_P4_A11_S107_comb	0.452348	0.739943	0.130193	13.8235	0.667885	0.0644279	S	Cancer	6280	0
1268	1284	Tumor	Prostate																			HNSCC17_P4_B02_S110_comb	0.485456	0.732608	0.154125	14.1631	0.0582874	0.551188	G2M	Cancer	6441	1.9195
1269	3711	Tumor	Prostate																			HNSCC17_P4_B08_S116_comb	0.426515	0.441274	0.156216	14.4075	0.121927	0.521684	G2M	Cancer	5320	0
1270	5335	Tumor	Prostate																			HNSCC17_P4_B09_S117_comb	0.407341	0.883933	0.137291	12.8385	-0.133213	-0.0894812	G1	Cancer	5581	0
1271	5499	Tumor	Prostate																			HNSCC17_P4_B10_S118_comb	0.474422	0.654846	0.140934	14.1497	0.763578	0.0590769	S	Cancer	6190	0
1272	1874	Tumor	Prostate																			HNSCC17_P4_C01_S121_comb	0.369229	0.485196	0.113952	12.5632	-0.106397	-0.119559	G1	Cancer	5478	0
1273	1329	Tumor	Prostate																			HNSCC17_P4_C06_S126_comb	0.389372	0.534513	0.129041	12.5615	-0.123647	-0.0389841	G1	Cancer	6340	0
1274	3905	Tumor	Prostate																			HNSCC17_P4_C07_S127_comb	0.487803	0.461435	0.145829	14.0148	0.641372	0.195519	S	Cancer	6896	0
1275	3781	Tumor	Prostate																			HNSCC17_P4_C09_S129_comb	0.384764	0.467701	0.122753	12.7655	-0.147458	-0.0930851	G1	Cancer	5616	0
1276	1748	Tumor	Prostate																			HNSCC17_P4_C12_S132_comb	0.402975	0.414199	0.147518	13.7332	0.562279	0.0390503	S	Cancer	5375	0
1277	4136	Tumor	Prostate																			HNSCC17_P4_D01_S133_comb	0.360229	0.872224	0.126823	12.1585	-0.132414	-0.103219	G1	Cancer	5680	0
1278	3299	Tumor	Prostate																			HNSCC17_P4_D03_S135_comb	0.508843	0.79814	0.146523	13.6516	0.553608	0.104047	S	Cancer	7929	0.84318
1279	1815	Tumor	Prostate																			HNSCC17_P4_D04_S136_comb	0.385784	0.472163	0.141973	12.8161	-0.228038	-0.0944396	G1	Cancer	6133	0
1280	683	Tumor	Prostate																			HNSCC17_P4_D05_S137_comb	0.395337	0.577456	0.129999	13.2955	-0.173597	-0.0586295	G1	Cancer	5224	0
1281	3392	Tumor	Prostate																			HNSCC17_P4_D06_S138_comb	0.402827	0.25864	0.141761	13.0927	-0.0240655	-0.0406693	G1	Cancer	5821	0
1282	3947	Tumor	Prostate																			HNSCC17_P4_D07_S139_comb	0.391512	0.609266	0.126159	12.5045	-0.159756	-0.112512	G1	Cancer	6706	0
1283	4279	Tumor	Prostate																			HNSCC17_P4_D08_S140_comb	0.355085	0.655255	0.13407	12.5379	-0.0854549	-0.129653	G1	Cancer	5773	0
1284	3994	Tumor	Prostate																			HNSCC17_P4_D10_S142_comb	0.416151	0.902113	0.131184	13.3327	-0.0141296	-0.0845998	G1	Cancer	5577	0
1285	2651	Tumor	Prostate																			HNSCC17_P4_E01_S145_comb	0.412555	0.652521	0.141394	12.9974	-0.0552172	-0.0790854	G1	Cancer	6300	0
1286	3979	Tumor	Prostate																			HNSCC17_P4_E04_S148_comb	0.515268	0.677487	0.163928	14.5923	0.165931	0.607565	G2M	Cancer	6713	1.8148
1287	3854	Tumor	Prostate																			HNSCC17_P4_E09_S153_comb	0.491174	0.511558	0.149577	13.8853	0.599963	0.0988333	S	Cancer	7157	2.0335
1288	2878	Tumor	Prostate																			HNSCC17_P4_E10_S154_comb	0.395368	0.895492	0.134984	12.9244	-0.099415	-0.14081	G1	Cancer	5467	0
1289	1507	Tumor	Prostate																			HNSCC17_P4_F02_S158_comb	0.414173	0.588951	0.138535	13.0708	-0.117298	-0.0769939	G1	Cancer	5496	0
1290	1688	Tumor	Prostate																			HNSCC17_P4_F04_S160_comb	0.367846	0.407027	0.127395	12.6376	-0.205663	-0.0248111	G1	Cancer	6052	0
1291	3140	Tumor	Prostate																			HNSCC17_P4_F06_S162_comb	0.366293	0.635962	0.133446	12.8386	-0.0743525	-0.0695779	G1	Cancer	4919	0
1292	3764	Tumor	Prostate																			HNSCC17_P4_F07_S163_comb	0.494944	0.614719	0.139076	14.1478	0.651228	0.0704275	S	Cancer	6482	0
1293	3055	Tumor	Prostate																			HNSCC17_P4_F09_S165_comb	0.406359	0.750626	0.129781	12.8579	-0.0814486	-0.108697	G1	Cancer	5994	0
1295	4020	Tumor	Prostate																			HNSCC17_P4_F12_S168_comb	0.361712	0.324703	0.132144	12.4095	-0.16142	-0.139618	G1	Cancer	5609	0
1296	2653	Tumor	Prostate																			HNSCC17_P4_G01_S169_comb	0.478851	0.646433	0.161571	14.7319	0.0764195	0.853173	G2M	Cancer	5441	2.7104
1297	2804	Tumor	Prostate																			HNSCC17_P4_G02_S170_comb	0.35194	0.60501	0.133099	13.0921	-0.104177	-0.0906615	G1	Normal	3103	0
1298	5717	Tumor	Prostate																			HNSCC17_P4_G03_S171_comb	0.403434	0.268553	0.134991	12.6431	-0.088861	-0.142199	G1	Cancer	6663	0
1299	1982	Tumor	Prostate																			HNSCC17_P4_G04_S172_comb	0.469318	0.575651	0.147384	13.9713	0.519194	0.0032943	S	Cancer	6388	0.69421
1300	1570	Tumor	Prostate																			HNSCC17_P4_G06_S174_comb	0.541069	0.518699	0.170661	14.9857	0.115185	0.801524	G2M	Cancer	6422	2.9396
1301	2569	Tumor	Prostate																			HNSCC17_P4_G09_S177_comb	0.498335	0.548826	0.159188	14.6947	0.0363696	0.505213	G2M	Cancer	5977	2.9079
1302	1339	Tumor	Prostate																			HNSCC17_P4_G10_S178_comb	0.366995	0.72286	0.1306	12.4483	-0.0695915	-0.0918782	G1	Cancer	5531	0
1303	4360	Tumor	Prostate																			HNSCC17_P4_G11_S179_comb	0.451726	0.546228	0.144566	13.7464	0.0134303	0.626093	G2M	Cancer	6191	3.2392
1304	2589	Tumor	Prostate																			HNSCC17_P4_H03_S183_comb	0.469709	0.55867	0.156254	15.5727	0.0807825	0.668341	G2M	Cancer	3373	0
1305	4690	Tumor	Prostate																			HNSCC17_P4_H04_S184_comb	0.373494	0.607453	0.144776	14.1056	0.595824	0.182981	S	Cancer	3994	1.4168
1306	3921	Tumor	Prostate																			HNSCC17_P4_H05_S185_comb	0.371147	0.735173	0.132137	12.5513	-0.125956	-0.0432472	G1	Cancer	6267	0
1307	2262	Tumor	Prostate																			HNSCC17_P4_H07_S187_comb	0.428505	0.719666	0.141806	13.5893	-0.108045	-0.0972614	G1	Cancer	5418	0
1308	3047	Tumor	Prostate																			HNSCC17_P4_H09_S189_comb	0.408536	0.651798	0.132135	12.9488	-0.096079	-0.0731811	G1	Cancer	6329	0
1309	3276	Tumor	Prostate																			HNSCC17_P7_A01_S97_comb	0.310348	0.208816	0.122877	11.5476	-0.0585737	-0.0571176	G1	Normal	3226	0
1310	2011	Tumor	Prostate																			HNSCC17_P7_A02_S98_comb	0.323822	0.180401	0.125838	12.2304	-0.0898203	-0.0684186	G1	Normal	2906	0
1311	2818	Tumor	Prostate																			HNSCC17_P7_A05_S101_comb	0.244251	0.209532	0.118659	11.8336	-0.0277936	-0.128245	G1	Normal	2339	0
1312	790	Tumor	Prostate																			HNSCC17_P7_A09_S105_comb	0.273494	0.189457	0.119507	11.6039	-0.111315	-0.0737227	G1	Normal	2282	0
1313	1547	Tumor	Prostate																			HNSCC17_P7_A10_S106_comb	0.376717	0.338812	0.130996	12.8474	-0.0217294	-0.204493	G1	Normal	3830	0
1314	1531	Tumor	Prostate																			HNSCC17_P7_A12_S108_comb	0.288354	0.646341	0.115106	11.0268	-0.0228427	-0.0804838	G1	Normal	2666	0
1315	2827	Tumor	Prostate																			HNSCC17_P7_B01_S109_comb	0.347163	0.227591	0.126628	12.2091	-0.0971826	-0.0759245	G1	Normal	3150	0
1316	3931	Tumor	Prostate																			HNSCC17_P7_B03_S111_comb	0.29476	0.214672	0.130365	12.498	-0.0572423	-0.143094	G1	Normal	2744	0
1317	5019	Tumor	Prostate																			HNSCC17_P7_B04_S112_comb	0.313891	0.659019	0.128133	12.527	-0.0592717	-0.148547	G1	Normal	3155	0
1318	2881	Tumor	Prostate																			HNSCC17_P7_B05_S113_comb	0.331225	0.22736	0.124616	12.0221	-0.0999838	-0.118759	G1	Normal	3044	0
1319	2902	Tumor	Prostate																			HNSCC17_P7_B06_S114_comb	0.329532	0.435876	0.118884	12.3048	-0.127423	-0.11787	G1	Normal	2866	0
1320	540	Tumor	Prostate																			HNSCC17_P7_B08_S116_comb	0.34475	0.291286	0.127086	12.7221	-0.057293	-0.0737462	G1	Normal	3044	0
1321	3830	Tumor	Prostate																			HNSCC17_P7_B09_S117_comb	0.388618	0.260689	0.144592	13.5016	-0.0560405	-0.153463	G1	Normal	2878	0
1322	2164	Tumor	Prostate																			HNSCC17_P7_B11_S119_comb	0.365376	0.281509	0.135718	12.5734	-0.100064	-0.0614588	G1	Normal	3396	0
1323	2210	Tumor	Prostate																			HNSCC17_P7_B12_S120_comb	0.507924	0.608372	0.15519	15.1046	0.0539009	0.732673	G2M	Cancer	5353	2.8534
1324	491	Tumor	Prostate																			HNSCC17_P7_C02_S122_comb	0.329564	0.262993	0.120438	12.2619	-0.134077	-0.157688	G1	Normal	3746	0
1325	2384	Tumor	Prostate																			HNSCC17_P7_C08_S128_comb	0.413349	0.276168	0.1482	14.0754	-0.0453009	-0.132013	G1	Normal	2899	0
1326	3506	Tumor	Prostate																			HNSCC17_P7_C10_S130_comb	0.358994	0.277509	0.136232	13.1449	-0.147208	-0.164414	G1	Normal	2830	0
1327	1278	Tumor	Prostate																			HNSCC17_P7_C11_S131_comb	0.255931	0.240384	0.124627	11.8304	-0.0883499	-0.0908607	G1	Normal	2672	0
1328	2538	Tumor	Prostate																			HNSCC17_P7_C12_S132_comb	0.404899	0.401492	0.145176	13.8663	-0.175266	-0.109181	G1	Normal	4173	0
1329	3399	Tumor	Prostate																			HNSCC17_P7_D02_S134_comb	0.558596	0.637933	0.170488	15.3689	0.295862	0.843195	G2M	Cancer	6225	3.7668
1330	3010	Tumor	Prostate																			HNSCC17_P7_D05_S137_comb	0.265992	0.312167	0.121002	11.7486	-0.07733	-0.121842	G1	Normal	3608	0
1331	2330	Tumor	Prostate																			HNSCC17_P7_D07_S139_comb	0.244687	0.166994	0.107534	10.7968	-0.0603032	-0.104413	G1	Normal	2312	0
1332	3534	Tumor	Prostate																			HNSCC17_P7_D09_S141_comb	0.329699	0.256532	0.123308	12.1967	-0.093474	-0.086234	G1	Normal	3217	0
1333	3121	Tumor	Prostate																			HNSCC17_P7_D10_S142_comb	0.322856	0.226414	0.122852	12.2767	-0.0986558	-0.103829	G1	Normal	2679	0
1334	1682	Tumor	Prostate																			HNSCC17_P7_D12_S144_comb	0.351821	0.238245	0.131103	12.7767	-0.0756472	-0.149772	G1	Normal	2426	0
1335	2954	Tumor	Prostate																			HNSCC17_P7_E02_S146_comb	0.325717	0.153208	0.124666	12.6043	-0.0453371	-0.0668373	G1	Normal	2099	0
1336	4798	Tumor	Prostate																			HNSCC17_P7_E03_S147_comb	0.389365	0.233199	0.146365	13.3904	-0.0543518	-0.0910226	G1	Normal	3270	0
1337	2568	Tumor	Prostate																			HNSCC17_P7_E04_S148_comb	0.335224	0.227779	0.142731	13.4409	-0.133794	-0.0878015	G1	Normal	2740	0
1338	3838	Tumor	Prostate																			HNSCC17_P7_E05_S149_comb	0.36057	0.262053	0.138693	13.065	-0.114515	-0.0570877	G1	Normal	3204	0
1339	2001	Tumor	Prostate																			HNSCC17_P7_E06_S150_comb	0.311513	0.254124	0.126354	12.0966	-0.15722	-0.152979	G1	Normal	3139	0
1340	1301	Tumor	Prostate																			HNSCC17_P7_E08_S152_comb	0.232617	0.179717	0.103954	10.5619	-0.00155795	-0.136583	G1	Normal	2215	0
1341	3368	Tumor	Prostate																			HNSCC17_P7_E10_S154_comb	0.358824	0.361192	0.133692	13.2359	-0.095004	-0.0874344	G1	Normal	2356	0
1342	3005	Tumor	Prostate																			HNSCC17_P7_F02_S158_comb	0.298327	0.256434	0.119594	11.6152	-0.155705	-0.0517689	G1	Normal	3374	0
1343	3564	Tumor	Prostate																			HNSCC17_P7_F03_S159_comb	0.352011	0.292013	0.127333	12.168	-0.0348343	-0.18873	G1	Normal	3616	0
1344	2541	Tumor	Prostate																			HNSCC17_P7_F04_S160_comb	0.346676	0.302766	0.121099	12.5089	-0.167999	-0.0407093	G1	Normal	3248	0
1345	5454	Tumor	Prostate																			HNSCC17_P7_F05_S161_comb	0.329665	0.217028	0.129841	12.5228	-0.0625459	-0.128893	G1	Normal	2588	0
1346	899	Tumor	Prostate																			HNSCC17_P7_F06_S162_comb	0.410481	0.275251	0.138866	12.9518	-0.0891592	-0.150344	G1	Normal	3490	0
1347	3250	Tumor	Prostate																			HNSCC17_P7_F08_S164_comb	0.292413	0.41444	0.12568	12.1811	-0.134811	-0.0713363	G1	Normal	2795	0
1348	3345	Tumor	Prostate																			HNSCC17_P7_F12_S168_comb	0.395447	0.34425	0.13762	13.495	-0.0805119	-0.0941821	G1	Normal	3661	0
1349	1091	Tumor	Prostate																			HNSCC17_P7_G03_S171_comb	0.331972	0.238223	0.124479	12.2956	-0.14359	-0.176518	G1	Normal	3177	0
1350	3638	Tumor	Prostate																			HNSCC17_P7_G04_S172_comb	0.292469	0.551214	0.126485	12.3114	-0.125461	-0.0769514	G1	Normal	3419	0
1351	1872	Tumor	Prostate																			HNSCC17_P7_G05_S173_comb	0.278773	0.256419	0.112951	11.6219	-0.128427	-0.0802337	G1	Cancer	3890	0
1352	4108	Tumor	Prostate																			HNSCC17_P7_G06_S174_comb	0.32621	0.243376	0.12778	12.3766	-0.144666	-0.0906862	G1	Normal	3176	0
1353	2816	Tumor	Prostate																			HNSCC17_P7_G07_S175_comb	0.407521	0.258739	0.148276	13.8731	-0.0821309	-0.172708	G1	Normal	2797	0
1354	2386	Tumor	Prostate																			HNSCC17_P7_G10_S178_comb	0.354653	0.24133	0.12459	12.1185	-0.138454	-0.113529	G1	Normal	3006	0
1355	717	Tumor	Prostate																			HNSCC17_P7_G11_S179_comb	0.373455	0.281305	0.134692	12.8145	-0.0229641	-0.0640036	G1	Cancer	3900	0
1356	2039	Tumor	Prostate																			HNSCC17_P7_H01_S181_comb	0.362699	0.352778	0.129095	12.7344	-0.0823769	-0.0468099	G1	Cancer	4124	0
1357	1061	Tumor	Prostate																			HNSCC17_P7_H02_S182_comb	0.510321	0.27082	0.165985	14.9244	0.117141	0.951039	G2M	Cancer	5869	4.1577
1358	2985	Tumor	Prostate																			HNSCC17_P7_H03_S183_comb	0.384509	0.267518	0.132472	12.8135	-0.136498	-0.0702989	G1	Normal	3441	0
1359	2868	Tumor	Prostate																			HNSCC17_P7_H05_S185_comb	0.332805	0.330928	0.122628	12.142	-0.174623	-0.171568	G1	Normal	3972	0
1360	2620	Tumor	Prostate																			HNSCC17_P7_H06_S186_comb	0.310563	0.335627	0.120371	12.0627	-0.035442	-0.150538	G1	Normal	3365	0
1361	2819	Tumor	Prostate																			HNSCC17_P7_H09_S189_comb	0.365637	0.335103	0.127193	12.2169	-0.0435597	-0.129601	G1	Normal	3883	0
1362	2042	Tumor	Prostate																			HNSCC17_P7_H10_S190_comb	0.361495	0.294457	0.134595	12.9904	-0.112606	-0.159774	G1	Normal	3501	0
1363	2574	Tumor	Prostate																			HNSCC17_P7_H11_S191_comb	0.335166	0.444084	0.12498	12.0806	-0.0716066	-0.0840198	G1	Cancer	5123	0
1364	1685	Tumor	Prostate																			HNSCC17_P7_H12_S192_comb	0.27247	0.229935	0.111505	11.4313	-0.0556599	-0.121418	G1	Normal	3014	0
1365	2342	Tumor	Prostate																			HNSCC17_P8_HNSCC17_P8_A08	0.342619	0.457852	0.134998	13.8762	-0.00782105	-0.0862849	G1	Normal	2732	0
1366	3602	Tumor	Prostate																			HNSCC17_P8_HNSCC17_P8_A09	0.308053	0.331852	0.128491	12.3763	-0.0453128	-0.112861	G1	Normal	3640	0
1367	1692	Tumor	Prostate																			HNSCC17_P8_HNSCC17_P8_B05	0.248585	0.219358	0.115049	10.9506	-0.106943	-0.144661	G1	Normal	3062	0
1368	2802	Tumor	Prostate																			HNSCC17_P8_HNSCC17_P8_B08	0.276471	0.21822	0.119398	11.6022	-0.0507549	-0.0976419	G1	Normal	3023	0
1369	1592	Tumor	Prostate																			HNSCC17_P8_HNSCC17_P8_B11	0.242418	0.227152	0.120408	11.7839	-0.124585	-0.109856	G1	Normal	3304	0
1370	1687	Tumor	Prostate																			HNSCC17_P8_HNSCC17_P8_C03	0.452664	0.317096	0.171409	15.8793	-0.000402245	-0.0312763	G1	Normal	3657	0
1371	2118	Tumor	Prostate																			HNSCC17_P8_HNSCC17_P8_C08	0.440597	0.231702	0.150483	14.7663	-0.137712	-0.0146855	G1	Normal	2765	0
1372	2138	Tumor	Prostate																			HNSCC17_P8_HNSCC17_P8_C09	0.359576	0.235614	0.138586	13.3916	-0.0623009	-0.115386	G1	Normal	3120	0
1462	6136	Tumor	Prostate																			HNSCC17_P8_HNSCC17_P8_C10	0.370973	0.279504	0.151343	14.5279	-0.00515081	-0.101659	G1	Normal	3326	0
1463	3775	Tumor	Prostate																			HNSCC17_P8_HNSCC17_P8_C12	0.314139	0.267758	0.129452	12.2019	-0.0781189	-0.0477095	G1	Normal	3245	0
1464	5392	Tumor	Prostate																			HNSCC17_P8_HNSCC17_P8_D03	0.365355	0.27498	0.126622	13.1214	-0.00600597	-0.0567269	G1	Normal	4064	0
1466	3688	Tumor	Prostate																			HNSCC17_P8_HNSCC17_P8_D04	0.376534	0.272862	0.144339	13.6453	-0.0899457	-0.0478507	G1	Normal	3521	0
1467	6460	Tumor	Prostate																			HNSCC17_P8_HNSCC17_P8_D12	0.2982	0.231738	0.131698	12.6357	-0.0634912	-0.166354	G1	Normal	3328	0
1468	5104	Tumor	Prostate																			HNSCC17_P8_HNSCC17_P8_E05	0.269402	0.248968	0.120848	11.8442	-0.0309131	-0.0861207	G1	Normal	2797	0
1469	1344	Tumor	Prostate																			HNSCC17_P8_HNSCC17_P8_E09	0.382537	0.239599	0.149187	14.5859	-0.040732	-0.037863	G1	Normal	3194	0
1470	4692	Tumor	Prostate																			HNSCC17_P8_HNSCC17_P8_E11	0.266362	0.291689	0.123811	12.2293	-0.0115714	-0.0877114	G1	Normal	2523	0
1471	5140	Tumor	Prostate																			HNSCC17_P8_HNSCC17_P8_F02	0.429919	0.23457	0.149064	13.9572	-0.0496039	-0.00164451	G1	Normal	3589	0
1472	4852	Tumor	Prostate																			HNSCC17_P8_HNSCC17_P8_F06	0.289653	0.265893	0.123659	12.1352	-0.128349	-0.0366647	G1	Normal	3416	0
1473	1254	Tumor	Prostate																			HNSCC17_P8_HNSCC17_P8_F10	0.395104	0.264334	0.154359	14.6403	-0.00312524	-0.0436215	G1	Normal	2872	0
1474	5216	Tumor	Prostate																			HNSCC18_P1_P9_HNSCC18_P1_P9_A03	0.356987	0.240644	0.124046	12.7244	-0.149667	-0.161519	G1	Cancer	3592	0
1475	2691	Tumor	Prostate																			HNSCC18_P1_P9_HNSCC18_P1_P9_A04	0.532015	0.422223	0.171018	14.7	0.367703	0.568774	G2M	Cancer	6168	2.0562
1476	3635	Tumor	Prostate																			HNSCC18_P1_P9_HNSCC18_P1_P9_A07	0.256436	0.281234	0.120571	11.8359	-0.0921876	-0.0992262	G1	Normal	2332	0
1477	6232	Tumor	Prostate																			HNSCC18_P1_P9_HNSCC18_P1_P9_B01	0.521391	0.447099	0.17755	15.0841	0.111503	0.789054	G2M	Cancer	5838	2.1976
1478	5909	Tumor	Prostate																			HNSCC18_P1_P9_HNSCC18_P1_P9_B06	0.496665	0.393401	0.164967	14.8596	0.568411	0.575679	G2M	Cancer	5851	2.4544
1479	4202	Tumor	Prostate																			HNSCC18_P1_P9_HNSCC18_P1_P9_B07	0.557244	0.861548	0.182779	15.9653	0.279587	0.545767	G2M	Cancer	5095	4.1612
1480	4479	Tumor	Prostate																			HNSCC18_P1_P9_HNSCC18_P1_P9_B09	0.37573	0.283484	0.123279	13.0461	-0.166877	-0.0899231	G1	Cancer	4204	0
1481	5707	Tumor	Prostate																			HNSCC18_P1_P9_HNSCC18_P1_P9_B10	0.304954	0.2222	0.132345	11.964	-0.15515	-0.0919058	G1	Cancer	4691	0
1482	3942	Tumor	Prostate																			HNSCC18_P1_P9_HNSCC18_P1_P9_C03	0.272413	0.300088	0.116951	11.738	-0.103465	-0.0810543	G1	Normal	2763	0
1483	1350	Tumor	Prostate																			HNSCC18_P1_P9_HNSCC18_P1_P9_C11	0.434464	0.245364	0.143385	14.0859	-0.0116266	-0.0315363	G1	Cancer	3695	0
1484	6074	Tumor	Prostate																			HNSCC18_P1_P9_HNSCC18_P1_P9_D01	0.341634	0.211064	0.122625	12.2448	-0.110071	-0.134569	G1	Cancer	4012	0
1485	2736	Tumor	Prostate																			HNSCC18_P1_P9_HNSCC18_P1_P9_D06	0.510528	0.324594	0.167787	16.2477	-0.0189343	0.905551	G2M	Cancer	3278	5.1786
1486	4832	Tumor	Prostate																			HNSCC18_P1_P9_HNSCC18_P1_P9_D08	0.26208	0.449971	0.116794	11.6028	-0.00948253	-0.0983917	G1	Normal	2376	0
1487	2014	Tumor	Prostate																			HNSCC18_P1_P9_HNSCC18_P1_P9_D09	0.357344	0.298766	0.136522	12.8677	-0.217807	-0.0591768	G1	Cancer	4468	0
1488	1365	Tumor	Prostate																			HNSCC18_P1_P9_HNSCC18_P1_P9_E02	0.323328	0.566804	0.129078	11.9527	-0.125617	-0.0955761	G1	Cancer	3302	0
1489	1118	Tumor	Prostate																			HNSCC18_P1_P9_HNSCC18_P1_P9_E04	0.304382	0.359603	0.121929	12.0191	-0.115288	-0.103706	G1	Cancer	4225	0
1490	4541	Tumor	Prostate																			HNSCC18_P1_P9_HNSCC18_P1_P9_E08	0.296422	1.03279	0.11938	11.7801	-0.191502	-0.073717	G1	Cancer	3805	0
1491	4994	Tumor	Prostate																			HNSCC18_P1_P9_HNSCC18_P1_P9_E09	0.538015	0.167726	0.168181	15.2115	0.606151	0.136153	S	Cancer	5386	2.1677
1492	5319	Tumor	Prostate																			HNSCC18_P1_P9_HNSCC18_P1_P9_E11	0.519046	0.534296	0.175457	15.1017	0.171485	0.679232	G2M	Cancer	5974	1.8906
1493	3946	Tumor	Prostate																			HNSCC18_P1_P9_HNSCC18_P1_P9_F05	0.376307	0.236275	0.140634	12.8957	-0.204525	-0.0162604	G1	Cancer	4633	0
1494	4098	Tumor	Prostate																			HNSCC18_P1_P9_HNSCC18_P1_P9_G01	0.504512	0.202389	0.17919	14.7477	0.067255	0.74169	G2M	Cancer	6088	2.158
1495	5521	Tumor	Prostate																			HNSCC18_P1_P9_HNSCC18_P1_P9_G02	0.326786	0.384499	0.122721	12.1617	-0.111667	-0.129695	G1	Cancer	3989	0
1496	4602	Tumor	Prostate																			HNSCC18_P1_P9_HNSCC18_P1_P9_G07	0.52903	0.23135	0.167281	14.7311	0.200346	0.603057	G2M	Cancer	6870	2.9727
1497	5741	Tumor	Prostate																			HNSCC18_P1_P9_HNSCC18_P1_P9_H05	0.37121	0.202117	0.132449	13.0084	-0.041938	-0.120323	G1	Cancer	4279	0
1498	4944	Tumor	Prostate																			HNSCC18_P1_P9_HNSCC18_P1_P9_H08	0.353849	0.318355	0.130864	12.3926	-0.205934	-0.0988726	G1	Cancer	4819	0
1499	4711	Tumor	Prostate																			HNSCC18_P1_P9_HNSCC18_P1_P9_H09	0.415818	0.356358	0.136149	13.5283	-0.132666	-0.091009	G1	Cancer	4689	0
1500	4545	Tumor	Prostate																			HNSCC18_P13_A02_S290_comb	0.36063	0.240674	0.141618	13.5517	-0.13908	-0.0562792	G1	Normal	2820	0
1501	4857	Tumor	Prostate																			HNSCC18_P13_A03_S291_comb	0.331783	0.535256	0.138475	13.6664	-0.0790541	-0.0527313	G1	Normal	2280	0
1502	2482	Tumor	Prostate																			HNSCC18_P13_A04_S292_comb	0.362698	0.272233	0.137046	13.3039	-0.14925	-0.105769	G1	Normal	3610	0
1503	5393	Tumor	Prostate																			HNSCC18_P13_A09_S297_comb	0.375582	0.512409	0.12711	12.8297	-0.0551667	-0.0765788	G1	Normal	5102	0
1504	5035	Tumor	Prostate																			HNSCC18_P13_A11_S299_comb	0.445497	0.23852	0.149418	13.9369	-0.104983	-0.115308	G1	Normal	2729	0
1505	784	Tumor	Prostate																			HNSCC18_P13_A12_S300_comb	0.383609	0.506781	0.133307	12.7934	-0.0528962	-0.0249649	G1	Normal	2606	0
1506	3568	Tumor	Prostate																			HNSCC18_P13_B06_S306_comb	0.385051	0.183679	0.138336	13.2119	-0.0231315	-0.0304744	G1	Normal	2448	0
1507	4935	Tumor	Prostate																			HNSCC18_P13_B08_S308_comb	0.415364	0.179758	0.149484	13.8078	-0.100456	-0.093609	G1	Normal	3712	0
1508	3728	Tumor	Prostate																			HNSCC18_P13_B09_S309_comb	0.349415	0.338474	0.13975	12.8298	-0.0168103	-0.113747	G1	Normal	3502	0
1509	1930	Tumor	Prostate																			HNSCC18_P13_C01_S313_comb	0.269462	0.292487	0.107083	11.6783	-0.133837	-0.144907	G1	Normal	3345	0
1510	4040	Tumor	Prostate																			HNSCC18_P13_C02_S314_comb	0.339581	0.240551	0.122074	12.697	-0.0377565	-0.105003	G1	Normal	2820	0
1511	4336	Tumor	Prostate																			HNSCC18_P13_C03_S315_comb	0.392511	0.285996	0.136335	12.9118	-0.0193826	-0.0524688	G1	Normal	2649	0
1512	5114	Tumor	Prostate																			HNSCC18_P13_C04_S316_comb	0.280087	0.292248	0.112517	11.8506	-0.131555	-0.110897	G1	Normal	2915	0
1513	5246	Tumor	Prostate																			HNSCC18_P13_C06_S318_comb	0.349361	0.551709	0.120708	12.2649	-0.0347993	-0.0544792	G1	Normal	2495	0
1514	4974	Tumor	Prostate																			HNSCC18_P13_C09_S321_comb	0.376986	0.269324	0.138511	13.6046	-0.119279	-0.0941984	G1	Normal	3087	0
1515	5437	Tumor	Prostate																			HNSCC18_P13_C10_S322_comb	0.329228	0.235786	0.138385	13.1443	-0.126772	-0.140731	G1	Normal	2726	0
1516	2455	Tumor	Prostate																			HNSCC18_P13_C12_S324_comb	0.38222	0.260098	0.135107	13.2917	-0.0829278	-0.012906	G1	Normal	3335	0
1517	2157	Tumor	Prostate																			HNSCC18_P13_D03_S327_comb	0.43077	0.298345	0.135429	13.9827	-0.116793	-0.0364546	G1	Normal	3291	0
1518	1980	Tumor	Prostate																			HNSCC18_P13_D04_S328_comb	0.331128	0.207433	0.130189	12.5322	-0.0144367	-0.10486	G1	Normal	2730	0
1519	1972	Tumor	Prostate																			HNSCC18_P13_D09_S333_comb	0.391375	0.526914	0.136163	13.1668	-0.105495	-0.00731391	G1	Normal	2173	0
1520	4372	Tumor	Prostate																			HNSCC18_P13_D11_S335_comb	0.358705	0.223834	0.125794	12.3866	-0.0465583	-0.0595742	G1	Normal	2765	0
1521	641	Tumor	Prostate																			HNSCC18_P13_E01_S337_comb	0.339114	0.385644	0.141596	14.5363	-0.0284538	-0.0344805	G1	Normal	2220	0
1522	4928	Tumor	Prostate																			HNSCC18_P13_E03_S339_comb	0.415579	0.252685	0.152991	14.6465	-0.106418	-0.0346317	G1	Normal	2670	0
1523	2204	Tumor	Prostate																			HNSCC18_P13_E05_S341_comb	0.341992	0.25051	0.133442	12.887	-0.0304392	-0.0254938	G1	Normal	2924	0
1524	3247	Tumor	Prostate																			HNSCC18_P13_E06_S342_comb	0.294162	0.241436	0.112238	11.2902	-0.0683017	-0.0672628	G1	Normal	4767	0
1525	5035	Tumor	Prostate																			HNSCC18_P13_E08_S344_comb	0.46806	0.284437	0.151376	14.702	-0.0493538	-0.0525214	G1	Normal	3047	0
1526	4294	Tumor	Prostate																			HNSCC18_P13_E09_S345_comb	0.292414	0.261755	0.120648	12.0353	-0.177037	-0.0542034	G1	Normal	2814	0
1527	3899	Tumor	Prostate																			HNSCC18_P13_E10_S346_comb	0.378701	0.26086	0.150358	13.716	-0.0787883	-0.149833	G1	Normal	3076	0
1528	4654	Tumor	Prostate																			HNSCC18_P13_F03_S351_comb	0.223679	0.217782	0.103482	10.337	-0.16209	-0.154357	G1	Normal	3548	0
1529	4350	Tumor	Prostate																			HNSCC18_P13_F04_S352_comb	0.343803	0.275603	0.132474	12.7322	-0.0792408	-0.095936	G1	Normal	3437	0
1530	2677	Tumor	Prostate																			HNSCC18_P13_F05_S353_comb	0.313157	0.199787	0.125154	11.8143	-0.0213024	-0.0299028	G1	Normal	3127	0
1531	2064	Tumor	Prostate																			HNSCC18_P13_F09_S357_comb	0.337108	0.181192	0.128978	13.2601	-0.0752653	-0.132961	G1	Normal	2291	0
1532	2520	Tumor	Prostate																			HNSCC18_P13_F11_S359_comb	0.400883	0.386679	0.131725	13.0621	-0.165365	-0.0400993	G1	Normal	3869	0
1533	4341	Tumor	Prostate																			HNSCC18_P13_G01_S361_comb	0.476125	0.214726	0.148946	14.4367	-0.104554	-0.0244596	G1	Normal	2379	0
1534	5565	Tumor	Prostate																			HNSCC18_P13_G03_S363_comb	0.426571	0.25409	0.139257	13.5983	-0.0138312	-0.0811443	G1	Normal	2768	0
1535	5113	Tumor	Prostate																			HNSCC18_P13_G06_S366_comb	0.414363	0.252178	0.13915	13.7158	-0.0852454	-0.0506213	G1	Normal	3093	0
1536	4889	Tumor	Prostate																			HNSCC18_P13_G08_S368_comb	0.343592	0.298115	0.135739	12.7348	-0.0397389	-0.0534241	G1	Normal	2700	0
1537	1681	Tumor	Prostate																			HNSCC18_P13_H01_S373_comb	0.409625	0.261079	0.150511	14.3205	-0.106011	-0.0373939	G1	Normal	2883	0
1538	1479	Tumor	Prostate																			HNSCC18_P13_H02_S374_comb	0.374906	0.21621	0.131928	13.1295	-0.113719	-0.124782	G1	Normal	2525	0
1602	3206	Tumor	Prostate																			HNSCC18_P13_H04_S376_comb	0.238583	0.105659	0.109338	10.741	-0.0177598	-0.0339182	G1	Normal	2715	0
1603	2658	Tumor	Prostate																			HNSCC18_P13_H08_S380_comb	0.455711	0.28319	0.156968	14.8222	-0.070015	-0.0255813	G1	Normal	2938	0
1604	3194	Tumor	Prostate																			HNSCC18_P13_H09_S381_comb	0.238142	0.154133	0.112637	11.8008	-0.0156453	-0.0566016	G1	Normal	2537	0
1605	6528	Tumor	Prostate																			HNSCC18_P13_H10_S382_comb	0.373452	0.27951	0.13628	12.7408	-0.0645445	-0.119318	G1	Normal	3195	0
1606	2113	Tumor	Prostate																			HNSCC18_P13_H12_S384_comb	0.36382	0.256569	0.132121	13.1665	-0.0207121	-0.0191286	G1	Normal	2189	0
1607	1176	Tumor	Prostate																			HNSCC18_P14_HNSCC18_P14_A02	0.361349	0.258407	0.134153	13.3483	-0.0361971	-0.0434523	G1	Normal	2536	0
1608	5788	Tumor	Prostate																			HNSCC18_P14_HNSCC18_P14_A10	0.31218	0.426327	0.122771	12.1369	-0.0874078	-0.0256783	G1	Normal	3481	0
1609	3962	Tumor	Prostate																			HNSCC18_P14_HNSCC18_P14_A12	0.411069	0.394701	0.153633	14.5273	-0.0577184	-0.0568565	G1	Normal	2949	0
1610	1547	Tumor	Prostate																			HNSCC18_P14_HNSCC18_P14_B01	0.334852	0.214905	0.141207	13.3145	-0.0987637	-0.0495538	G1	Normal	3383	0
1611	581	Tumor	Prostate																			HNSCC18_P14_HNSCC18_P14_B05	0.294143	0.186552	0.129068	12.3871	-0.00231563	-0.0919723	G1	Normal	3373	0
1612	3637	Tumor	Prostate																			HNSCC18_P14_HNSCC18_P14_C04	0.323742	0.176285	0.125564	12.3104	-0.0685525	-0.0718626	G1	Normal	3221	0
1613	5294	Tumor	Prostate																			HNSCC18_P14_HNSCC18_P14_C07	0.274508	0.214815	0.121946	11.9378	-0.0957413	-0.101435	G1	Normal	3067	0
1614	2410	Tumor	Prostate																			HNSCC18_P14_HNSCC18_P14_C08	0.478875	0.270839	0.165739	15.2185	-0.020951	-0.0211115	G1	Normal	3898	0
1615	5765	Tumor	Prostate																			HNSCC18_P14_HNSCC18_P14_C10	0.335015	0.192924	0.124407	12.6461	-0.143231	-0.0309847	G1	Normal	3916	0
1616	4548	Tumor	Prostate																			HNSCC18_P14_HNSCC18_P14_D04	0.4	0.204592	0.156526	14.5286	-0.0564851	-0.120809	G1	Normal	3360	0
1617	1535	Tumor	Prostate																			HNSCC18_P14_HNSCC18_P14_D06	0.351974	0.225382	0.126108	12.3995	-0.0458063	-0.026424	G1	Normal	2901	0
1618	2002	Tumor	Prostate																			HNSCC18_P14_HNSCC18_P14_D09	0.330856	0.292926	0.136622	12.9323	-0.110093	-0.0656015	G1	Normal	3363	0
1619	2458	Tumor	Prostate																			HNSCC18_P14_HNSCC18_P14_D10	0.274658	0.207041	0.111459	11.0063	-0.0872133	-0.0235132	G1	Normal	2290	0
1620	1799	Tumor	Prostate																			HNSCC18_P14_HNSCC18_P14_D12	0.29902	0.192528	0.127831	12.7367	-0.0291038	-0.14894	G1	Normal	2500	0
1621	2154	Tumor	Prostate																			HNSCC18_P14_HNSCC18_P14_E01	0.300063	0.2745	0.134481	12.9208	-0.0254735	-0.115415	G1	Normal	3452	0
1622	1590	Tumor	Prostate																			HNSCC18_P14_HNSCC18_P14_E03	0.281899	0.328463	0.138331	12.9553	-0.00855746	-0.104658	G1	Normal	3405	0
1623	5136	Tumor	Prostate																			HNSCC18_P14_HNSCC18_P14_E04	0.331871	0.164131	0.13422	13.0512	-0.0620254	-0.0655501	G1	Normal	3177	0
171	2230	Tumor	Prostate																			HNSCC18_P14_HNSCC18_P14_E06	0.230561	0.208024	0.116958	11.5138	-0.0239445	-0.0408064	G1	Normal	3218	0.020058
172	1748	Tumor	Prostate																			HNSCC18_P14_HNSCC18_P14_E08	0.324528	0.191027	0.139089	13.7054	-0.0415542	-0.0873477	G1	Normal	3059	0
173	2329	Tumor	Prostate																			HNSCC18_P14_HNSCC18_P14_E12	0.291722	0.206868	0.125575	12.7657	-0.0538294	-0.0701878	G1	Normal	2313	0
175	2713	Tumor	Prostate																			HNSCC18_P14_HNSCC18_P14_F04	0.266456	0.224324	0.129217	12.6654	-0.00180196	-0.0656055	G1	Normal	3003	0
176	3503	Tumor	Prostate																			HNSCC18_P14_HNSCC18_P14_F08	0.376352	0.232382	0.143593	14.3262	-0.0262156	-0.0290757	G1	Normal	2970	0
177	2643	Tumor	Prostate																			HNSCC18_P14_HNSCC18_P14_F11	0.320256	0.293458	0.141479	14.4292	-0.0785849	-0.0299204	G1	Normal	2931	0
179	2788	Tumor	Prostate																			HNSCC18_P14_HNSCC18_P14_G04	0.237835	0.251705	0.121239	11.8747	-0.0532482	-0.011879	G1	Normal	2943	0
180	3197	Tumor	Prostate																			HNSCC18_P14_HNSCC18_P14_G08	0.346907	0.201983	0.129526	12.5777	-0.110083	-0.0721576	G1	Normal	3166	0
181	2804	Tumor	Prostate																			HNSCC18_P14_HNSCC18_P14_G12	0.374687	0.377882	0.144094	13.6907	-0.0913123	-0.107917	G1	Normal	3359	0
182	4098	Tumor	Prostate																			HNSCC18_P14_HNSCC18_P14_H04	0.368862	0.125129	0.131455	13.4739	-0.0511762	-0.0551747	G1	Normal	2516	0
184	2476	Tumor	Prostate																			HNSCC18_P14_HNSCC18_P14_H05	0.336585	0.212691	0.131604	13.1031	-0.027465	-0.00409406	G1	Normal	3188	0
187	1960	Tumor	Prostate																			HNSCC18_P14_HNSCC18_P14_H08	0.306799	0.192929	0.124186	12.2391	-0.0419333	-0.124921	G1	Normal	3374	0
188	1871	Tumor	Prostate																			HNSCC18_P15_A01_S1_comb	0.323259	0.21763	0.130409	12.6609	-0.0235287	-0.111285	G1	Normal	2736	0
189	2928	Tumor	Prostate																			HNSCC18_P15_A03_S3_comb	0.314585	0.296483	0.131233	12.6712	-0.0637098	-0.0680123	G1	Normal	4312	0
190	2336	Tumor	Prostate																			HNSCC18_P15_A05_S5_comb	0.371731	0.207362	0.138385	13.1154	-0.10771	-0.0906034	G1	Normal	2946	0
191	512	Tumor	Prostate																			HNSCC18_P15_A07_S7_comb	0.360707	0.337809	0.139315	13.6253	-0.120314	-0.0432579	G1	Normal	4348	0
192	1147	Tumor	Prostate																			HNSCC18_P15_A10_S10_comb	0.431622	0.245811	0.150556	13.9712	-0.0274824	-0.0454668	G1	Normal	3332	0
193	1577	Tumor	Prostate																			HNSCC18_P15_A11_S11_comb	0.306665	0.348066	0.129002	12.7114	-0.129134	-0.0817636	G1	Normal	2406	0
194	742	Tumor	Prostate																			HNSCC18_P15_A12_S12_comb	0.334414	0.226692	0.13152	12.4924	-0.0868565	-0.0487528	G1	Normal	2957	0
195	2232	Tumor	Prostate																			HNSCC18_P15_B02_S14_comb	0.244412	0.192894	0.124505	12.0754	-0.123909	-0.0881894	G1	Normal	2536	0
1950	1158	Tumor	Prostate																			HNSCC18_P15_B07_S19_comb	0.493647	0.196233	0.146401	15.3883	-0.0310087	-0.0160462	G1	Normal	2086	0
1951	1165	Tumor	Prostate																			HNSCC18_P15_B10_S22_comb	0.422042	0.207754	0.15403	15.3775	-0.0832016	-0.070223	G1	Normal	2348	0
1953	775	Tumor	Prostate																			HNSCC18_P15_B11_S23_comb	0.363275	0.272667	0.14284	13.8588	-0.118593	-0.11101	G1	Normal	3271	0
196	1548	Tumor	Prostate																			HNSCC18_P15_C03_S27_comb	0.270071	0.23308	0.122423	11.9673	-0.110094	-0.0826923	G1	Normal	3144	0
197	1960	Tumor	Prostate																			HNSCC18_P15_C04_S28_comb	0.326354	0.341922	0.135868	12.9438	-0.0965021	-0.0163684	G1	Normal	4385	0
198	1575	Tumor	Prostate																			HNSCC18_P15_C07_S31_comb	0.221989	0.141402	0.112333	11.545	-0.0779768	-0.0679199	G1	Normal	2391	0
199	2002	Tumor	Prostate																			HNSCC18_P15_C10_S34_comb	0.332912	0.259181	0.133921	12.9103	-0.123177	-0.0152266	G1	Normal	2676	0
2	727	Tumor	Prostate																			HNSCC18_P15_D01_S37_comb	0.280502	0.185103	0.122784	11.9787	-0.109826	-0.0927126	G1	Normal	2772	0
200	1707	Tumor	Prostate																			HNSCC18_P15_D02_S38_comb	0.292022	0.183838	0.12793	12.3763	-0.0462976	-0.0223822	G1	Normal	2553	0
201	1097	Tumor	Prostate																			HNSCC18_P15_D04_S40_comb	0.356191	0.210986	0.140314	13.0943	-0.101026	-0.0370111	G1	Normal	3320	0
202	1126	Tumor	Prostate																			HNSCC18_P15_D05_S41_comb	0.401436	0.269514	0.15416	14.5961	-0.0876714	-0.033086	G1	Normal	3069	0
203	1286	Tumor	Prostate																			HNSCC18_P15_D12_S48_comb	0.542763	0.205255	0.158744	15.5164	-0.051293	-0.0318136	G1	Normal	2470	0
204	2764	Tumor	Prostate																			HNSCC18_P15_E01_S49_comb	0.392896	0.257592	0.153798	14.7683	-0.12438	-0.0659837	G1	Normal	3042	0
205	2424	Tumor	Prostate																			HNSCC18_P15_E05_S53_comb	0.372426	0.230302	0.14572	14.0418	-0.0877316	-0.0514918	G1	Normal	3064	0
206	1578	Tumor	Prostate																			HNSCC18_P15_E06_S54_comb	0.390277	0.199602	0.138008	14.2444	-0.0963808	-0.0670146	G1	Normal	2229	0
207	3078	Tumor	Prostate																			HNSCC18_P15_E07_S55_comb	0.333532	0.435973	0.13113	12.7409	-0.0255051	-0.0554175	G1	Normal	3127	0
208	2098	Tumor	Prostate																			HNSCC18_P15_E11_S59_comb	0.411034	0.283414	0.148542	14.2568	-0.0470267	-0.0964337	G1	Normal	2379	0
209	1670	Tumor	Prostate																			HNSCC18_P15_F01_S61_comb	0.386836	0.29254	0.146901	14.0621	-0.152372	-0.0340848	G1	Normal	3456	0
210	2180	Tumor	Prostate																			HNSCC18_P15_F05_S65_comb	0.367603	0.194616	0.148497	13.9429	-0.0349189	-0.0671042	G1	Normal	3218	0
211	2635	Tumor	Prostate																			HNSCC18_P15_F11_S71_comb	0.391016	0.335548	0.151096	14.4333	-0.0801063	-0.0402963	G1	Normal	3166	0
212	2997	Tumor	Prostate																			HNSCC18_P15_G03_S75_comb	0.357642	0.474611	0.134497	13.1311	-0.00388592	-0.00528572	G1	Normal	4613	0
213	945	Tumor	Prostate																			HNSCC18_P15_G06_S78_comb	0.349473	0.205599	0.13965	13.8886	-0.0322868	-0.105994	G1	Normal	2830	0
214	606	Tumor	Prostate																			HNSCC18_P15_G09_S81_comb	0.41908	0.375681	0.146023	14.3974	-0.0876253	-0.0917511	G1	Normal	2488	0
215	2273	Tumor	Prostate																			HNSCC18_P15_G12_S84_comb	0.436344	0.241447	0.155877	15.0252	-0.0570259	-0.074614	G1	Normal	3034	0
216	1936	Tumor	Prostate																			HNSCC18_P15_H05_S89_comb	0.411909	0.320269	0.147645	14.0912	-0.0646207	-0.0147087	G1	Normal	4130	0
217	2292	Tumor	Prostate																			HNSCC18_P15_H07_S91_comb	0.362271	0.204348	0.137507	13.7206	-0.0381842	-0.0871806	G1	Normal	2688	0
218	775	Tumor	Prostate																			HNSCC18_P15_H08_S92_comb	0.34533	0.208175	0.142016	13.7856	-0.0238689	-0.0385522	G1	Normal	2972	0
219	1578	Tumor	Prostate																			HNSCC18_P16_A01_S193_comb	0.398039	0.216166	0.147306	14.0624	-0.0981672	-0.0551654	G1	Normal	3026	0
220	1266	Tumor	Prostate																			HNSCC18_P16_A05_S197_comb	0.433471	0.295338	0.150081	14.5645	-0.0567965	-0.0371947	G1	Normal	2615	0
221	1350	Tumor	Prostate																			HNSCC18_P16_A09_S201_comb	0.37921	0.239923	0.142627	13.5816	-0.090223	-0.0262907	G1	Normal	3299	0
222	1455	Tumor	Prostate																			HNSCC18_P16_A10_S202_comb	0.355375	0.230679	0.137734	13.1001	-0.0587459	-0.11541	G1	Normal	3112	0
223	987	Tumor	Prostate																			HNSCC18_P16_B04_S208_comb	0.377111	0.264265	0.141609	13.417	-0.05596	-0.062082	G1	Normal	3257	0
224	1993	Tumor	Prostate																			HNSCC18_P16_B07_S211_comb	0.388238	0.22147	0.147755	14.5052	-0.11921	-0.000544033	G1	Normal	2371	0
225	1526	Tumor	Prostate																			HNSCC18_P16_B10_S214_comb	0.383611	0.343895	0.13445	12.8168	-0.00554195	-0.175312	G1	Normal	4366	0
226	1503	Tumor	Prostate																			HNSCC18_P16_B11_S215_comb	0.373776	0.240685	0.149167	15.0301	-0.0960941	-0.114461	G1	Normal	2709	0
227	1122	Tumor	Prostate																			HNSCC18_P16_C05_S221_comb	0.277979	0.13935	0.110857	11.166	-0.125901	-0.0479341	G1	Normal	2164	0
228	2490	Tumor	Prostate																			HNSCC18_P16_E02_S242_comb	0.344653	0.254466	0.137791	13.4219	-0.0793575	-0.0920265	G1	Normal	2986	0
229	689	Tumor	Prostate																			HNSCC18_P16_E11_S251_comb	0.30548	0.275334	0.142272	13.5999	-0.120687	-0.00988089	G1	Normal	3310	0
230	1060	Tumor	Prostate																			HNSCC18_P16_F02_S254_comb	0.394306	0.203996	0.143848	13.6968	-0.0511057	-0.00664801	G1	Normal	3162	0
231	1457	Tumor	Prostate																			HNSCC18_P16_F04_S256_comb	0.354898	0.262148	0.146345	14.0126	-0.00262177	-0.0431328	G1	Normal	3468	0
232	1049	Tumor	Prostate																			HNSCC18_P16_F06_S258_comb	0.346457	0.194609	0.132882	13.4068	-0.0188797	-0.0960664	G1	Normal	2640	0
233	1387	Tumor	Prostate																			HNSCC18_P16_H07_S283_comb	0.363	0.353046	0.123074	12.0904	-0.0426352	-0.0839508	G1	Normal	3214	0
234	1643	Tumor	Prostate																			HNSCC18_P16_H08_S284_comb	0.414525	0.207927	0.148316	15.9863	-0.0177054	-0.112123	G1	Normal	2275	0
235	1238	Tumor	Prostate																			HNSCC18_P16_H09_S285_comb	0.376622	0.239179	0.140824	14.511	-0.102409	-0.110828	G1	Normal	2624	0
236	2345	Tumor	Prostate																			HNSCC18_P16_H12_S288_comb	0.314068	0.239993	0.126285	13.1783	-0.0884032	-0.0722063	G1	Normal	2594	0
237	1636	Tumor	Prostate																			HNSCC18_P2_A03_S99_comb	0.521209	0.658635	0.185225	15.0358	0.0912331	0.614242	G2M	Cancer	5227	3.2265
238	526	Tumor	Prostate																			HNSCC18_P2_A07_S103_comb	0.373005	0.240618	0.138606	12.9083	-0.196867	-0.110179	G1	Cancer	4990	0
239	752	Tumor	Prostate																			HNSCC18_P2_A12_S108_comb	0.297681	0.235716	0.135586	11.8828	-0.10853	-0.236595	G1	Cancer	5112	0
240	1378	Tumor	Prostate																			HNSCC18_P2_B05_S113_comb	0.39573	0.720259	0.152053	13.2768	-0.192536	-0.156943	G1	Cancer	4774	0
241	1395	Tumor	Prostate																			HNSCC18_P2_C05_S125_comb	0.461224	0.467185	0.147473	15.0277	0.118505	0.675704	G2M	Cancer	3755	3.0978
242	1942	Tumor	Prostate																			HNSCC18_P2_C06_S126_comb	0.31603	0.487165	0.119895	11.6928	-0.116726	-0.140943	G1	Cancer	5646	0
243	597	Tumor	Prostate																			HNSCC18_P2_C12_S132_comb	0.39197	0.447189	0.141909	12.9919	-0.126109	-0.177447	G1	Cancer	4408	0
244	1363	Tumor	Prostate																			HNSCC18_P2_D01_S133_comb	0.451362	0.232981	0.138181	15.0411	0.045991	0.559317	G2M	Cancer	3538	4.8172
245	990	Tumor	Prostate																			HNSCC18_P2_D04_S136_comb	0.367622	0.441097	0.127913	12.4958	-0.079098	-0.133103	G1	Cancer	4974	0
246	1405	Tumor	Prostate																			HNSCC18_P2_E01_S145_comb	0.376588	0.443703	0.13738	12.6932	-0.145474	-0.0253067	G1	Cancer	4682	0
247	2278	Tumor	Prostate																			HNSCC18_P2_E03_S147_comb	0.365907	0.286219	0.131423	12.8395	-0.0944355	-0.166628	G1	Normal	3269	0
248	1380	Tumor	Prostate																			HNSCC18_P2_E09_S153_comb	0.323728	0.589768	0.126269	11.8964	-0.158974	-0.221371	G1	Cancer	4449	0.22651
249	1791	Tumor	Prostate																			HNSCC18_P2_E10_S154_comb	0.355373	0.361797	0.124894	12.2507	-0.105965	-0.07899	G1	Cancer	4362	0
250	1742	Tumor	Prostate																			HNSCC18_P2_E11_S155_comb	0.53499	0.802474	0.183379	15.834	0.264702	0.753437	G2M	Cancer	5313	4.2658
251	1620	Tumor	Prostate																			HNSCC18_P2_F01_S157_comb	0.516442	0.290635	0.179779	15.1352	0.318382	0.736754	G2M	Cancer	6057	2.8994
252	902	Tumor	Prostate																			HNSCC18_P2_F02_S158_comb	0.307834	0.364333	0.129611	11.8884	-0.115831	-0.034757	G1	Cancer	4148	0
253	3627	Tumor	Prostate																			HNSCC18_P2_F03_S159_comb	0.410931	0.577974	0.147291	13.7706	0.653533	0.10482	S	Cancer	4938	2.2552
254	1833	Tumor	Prostate																			HNSCC18_P2_F06_S162_comb	0.316743	0.220316	0.117743	12.2477	-0.122616	-0.0823327	G1	Cancer	4063	0
255	1401	Tumor	Prostate																			HNSCC18_P2_F07_S163_comb	0.330499	0.244187	0.134894	13.2601	-0.104283	-0.0833006	G1	Normal	2022	0
256	2228	Tumor	Prostate																			HNSCC18_P2_F11_S167_comb	0.243553	0.214422	0.113041	10.7169	-0.14301	-0.10099	G1	Cancer	4466	0
257	1867	Tumor	Prostate																			HNSCC18_P2_F12_S168_comb	0.392179	0.207937	0.130369	12.7816	-0.0657949	-0.127017	G1	Normal	2227	0
258	2772	Tumor	Prostate																			HNSCC18_P2_G03_S171_comb	0.391885	0.408213	0.14306	13.2238	-0.0613242	-0.122836	G1	Normal	4085	0
259	1566	Tumor	Prostate																			HNSCC18_P2_G04_S172_comb	0.337266	0.398667	0.123943	12.5445	-0.0882958	-0.201113	G1	Normal	4124	0
260	1428	Tumor	Prostate																			HNSCC18_P2_G07_S175_comb	0.27107	0.39932	0.120322	11.5216	-0.174301	-0.137464	G1	Cancer	4355	0
261	1100	Tumor	Prostate																			HNSCC18_P2_G09_S177_comb	0.415346	0.221304	0.14002	13.531	-0.111897	-0.134123	G1	Normal	2230	0
262	2349	Tumor	Prostate																			HNSCC18_P2_H04_S184_comb	0.40822	0.257579	0.139687	13.2464	-0.0314296	-0.110241	G1	Normal	2804	0
263	1421	Tumor	Prostate																			HNSCC18_P2_H10_S190_comb	0.304231	0.243731	0.117451	11.2394	-0.126996	-0.065494	G1	Cancer	3498	0
264	2130	Tumor	Prostate																			HNSCC18_P3_A02_S290_comb	0.402466	0.263612	0.144094	14.1297	-0.00855716	-0.0401502	G1	Normal	2552	0
265	932	Tumor	Prostate																			HNSCC18_P3_A08_S296_comb	0.522155	0.77702	0.167991	14.7126	0.727433	0.14719	S	Cancer	6199	0
266	3429	Tumor	Prostate																			HNSCC18_P3_B01_S301_comb	0.51242	0.760923	0.171803	14.7781	0.61836	0.314751	S	Cancer	6054	0.87263
267	1682	Tumor	Prostate																			HNSCC18_P3_B06_S306_comb	0.482053	0.380717	0.155921	15.7916	0.0485973	0.960954	G2M	Cancer	2838	4.0865
268	2191	Tumor	Prostate																			HNSCC18_P3_B08_S308_comb	0.439268	0.249216	0.158654	14.224	-0.107484	-0.14455	G1	Normal	3967	0
269	1083	Tumor	Prostate																			HNSCC18_P3_B10_S310_comb	0.348929	0.385106	0.131982	12.6137	-0.100648	-0.190587	G1	Cancer	3612	0
270	1895	Tumor	Prostate																			HNSCC18_P3_B11_S311_comb	0.477137	0.294537	0.154731	14.7472	-0.0119195	-0.138881	G1	Normal	2869	0
271	1807	Tumor	Prostate																			HNSCC18_P3_C12_S324_comb	0.354514	0.532604	0.153739	12.6652	-0.0397945	-0.0359587	G1	Cancer	5573	0
272	2039	Tumor	Prostate																			HNSCC18_P3_D01_S325_comb	0.379308	0.51797	0.151203	12.8876	-0.126714	-0.147402	G1	Cancer	5134	0
273	1175	Tumor	Prostate																			HNSCC18_P3_D10_S334_comb	0.317729	0.425609	0.129237	12.0661	-0.226056	-0.182571	G1	Cancer	4562	0
274	854	Tumor	Prostate																			HNSCC18_P3_E02_S338_comb	0.330348	0.480003	0.141765	11.7839	-0.196243	-0.211665	G1	Cancer	5782	0
275	2157	Tumor	Prostate																			HNSCC18_P3_E07_S343_comb	0.292597	0.359994	0.116655	12.2892	-0.174962	-0.147668	G1	Normal	3473	0
276	1491	Tumor	Prostate																			HNSCC18_P3_E08_S344_comb	0.352926	0.334957	0.137547	12.4926	-0.0648947	-0.0962549	G1	Cancer	4287	0
277	870	Tumor	Prostate																			HNSCC18_P3_E11_S347_comb	0.295555	0.489315	0.121934	12.2694	-0.0481033	-0.158554	G1	Cancer	4625	0.017209
278	1252	Tumor	Prostate																			HNSCC18_P3_E12_S348_comb	0.290078	0.416011	0.136146	11.3565	-0.049446	-0.0902301	G1	Cancer	5529	0
279	1493	Tumor	Prostate																			HNSCC18_P3_F08_S356_comb	0.326317	0.415999	0.144308	12.4254	-0.153986	-0.0502867	G1	Cancer	4301	0
280	3553	Tumor	Prostate																			HNSCC18_P3_F10_S358_comb	0.29874	0.401492	0.115043	12.0008	-0.136476	-0.15726	G1	Cancer	3723	0
281	3088	Tumor	Prostate																			HNSCC18_P3_G02_S362_comb	0.34913	0.630597	0.139626	12.0342	-0.198194	-0.173685	G1	Cancer	5772	0
282	1982	Tumor	Prostate																			HNSCC18_P3_G12_S372_comb	0.345405	0.199689	0.131181	12.7265	-0.0411694	-0.0366411	G1	Normal	2314	0
283	3418	Tumor	Prostate																			HNSCC18_P3_H01_S373_comb	0.531678	0.761344	0.167233	14.7351	0.662345	0.344588	S	Cancer	6379	1.926
284	661	Tumor	Prostate																			HNSCC18_P3_H02_S374_comb	0.316724	0.437993	0.122103	11.8256	-0.219121	-0.141485	G1	Cancer	4930	0
285	1460	Tumor	Prostate																			HNSCC18_P3_H03_S375_comb	0.334019	0.356188	0.133028	12.9036	-0.100013	-0.169505	G1	Normal	3525	0
287	2764	Tumor	Prostate																			HNSCC18_P3_H04_S376_comb	0.349052	0.334972	0.133336	13.1781	-0.0999149	-0.117234	G1	Normal	3037	0
288	1118	Tumor	Prostate																			HNSCC18_P3_H05_S377_comb	0.370602	0.558994	0.140168	12.21	-0.144134	-0.164872	G1	Cancer	7274	0
289	1341	Tumor	Prostate																			HNSCC18_P3_H08_S380_comb	0.317415	0.421756	0.133654	12.4861	-0.131653	-0.128696	G1	Cancer	3980	0
290	1793	Tumor	Prostate																			HNSCC18_P3_H10_S382_comb	0.428661	0.608187	0.142664	13.612	-0.116251	-0.0302936	G1	Normal	2687	0
291	2296	Tumor	Prostate																			HNSCC18_P3_H12_S384_comb	0.47978	0.80109	0.173928	14.6696	0.667094	0.258213	S	Cancer	6029	1.8726
292	1466	Tumor	Prostate																			HNSCC18_P4_A05_S5_comb	0.232525	0.156577	0.110378	11.0182	-0.0768037	-0.106701	G1	Normal	3158	0
293	918	Tumor	Prostate																			HNSCC18_P4_A09_S9_comb	0.524815	0.619038	0.174094	15.4111	0.184628	0.605939	G2M	Cancer	5255	4.5855
294	2185	Tumor	Prostate																			HNSCC18_P4_A11_S11_comb	0.404827	0.239427	0.13406	13.1778	-0.00262061	-0.0463388	G1	Normal	2553	0
295	1423	Tumor	Prostate																			HNSCC18_P4_A12_S12_comb	0.329071	0.36695	0.128687	12.0623	-0.0700254	-0.113178	G1	Cancer	3956	0
296	2909	Tumor	Prostate																			HNSCC18_P4_B09_S21_comb	0.334216	0.181044	0.121019	11.9128	-0.116386	-0.10552	G1	Normal	2658	0
297	4987	Tumor	Prostate																			HNSCC18_P4_B11_S23_comb	0.623632	1.02656	0.159405	13.9373	0.308431	0.548109	G2M	Cancer	9508	0.96495
298	1801	Tumor	Prostate																			HNSCC18_P4_C01_S25_comb	0.389246	0.475297	0.148724	13.4996	-0.0910652	-0.099113	G1	Cancer	4114	0
299	5178	Tumor	Prostate																			HNSCC18_P4_C02_S26_comb	0.332381	0.401501	0.131655	12.322	-0.0679338	-0.196262	G1	Cancer	4026	0
3	1815	Tumor	Prostate																			HNSCC18_P4_C03_S27_comb	0.381469	0.438087	0.141464	12.3724	-0.236428	-0.071382	G1	Cancer	5328	0
300	543	Tumor	Prostate																			HNSCC18_P4_C04_S28_comb	0.364863	0.401341	0.127582	12.3008	-0.137976	-0.129388	G1	Cancer	5010	0
301	1268	Tumor	Prostate																			HNSCC18_P4_C07_S31_comb	0.365523	0.402869	0.131881	12.7757	-0.138395	-0.0884281	G1	Cancer	4480	0
302	1444	Tumor	Prostate																			HNSCC18_P4_C10_S34_comb	0.53567	0.608802	0.186909	16.1322	0.371184	0.733012	G2M	Cancer	4073	3.1458
303	1988	Tumor	Prostate																			HNSCC18_P4_C11_S35_comb	0.395019	0.408464	0.144396	13.6446	-0.189043	-0.108122	G1	Cancer	3568	0
304	2006	Tumor	Prostate																			HNSCC18_P4_D09_S45_comb	0.284585	0.328173	0.127215	12.4258	-0.132951	-0.0408561	G1	Cancer	4372	0
305	2633	Tumor	Prostate																			HNSCC18_P4_D10_S46_comb	0.349959	0.249405	0.132048	12.93	-0.0919574	-0.0328223	G1	Normal	3520	0
306	1844	Tumor	Prostate																			HNSCC18_P4_E01_S49_comb	0.500919	0.660478	0.177953	14.921	0.129419	0.72828	G2M	Cancer	5391	3.7243
307	1532	Tumor	Prostate																			HNSCC18_P4_E03_S51_comb	0.270152	0.326594	0.108745	11.2283	-0.16043	-0.0752926	G1	Cancer	4277	0
308	542	Tumor	Prostate																			HNSCC18_P4_E04_S52_comb	0.383178	0.308399	0.123605	12.2515	-0.108886	-0.173983	G1	Cancer	4253	0
309	2463	Tumor	Prostate																			HNSCC18_P4_E07_S55_comb	0.36309	0.480454	0.12586	12.299	-0.135122	-0.185198	G1	Cancer	5659	0
310	1096	Tumor	Prostate																			HNSCC18_P4_F03_S63_comb	0.353346	0.340965	0.129718	12.8211	-0.164832	-0.170244	G1	Cancer	4153	0
311	847	Tumor	Prostate																			HNSCC18_P4_F11_S71_comb	0.477838	0.649409	0.166487	14.6009	0.460479	0.562781	G2M	Cancer	5364	0.46989
312	2284	Tumor	Prostate																			HNSCC18_P4_F12_S72_comb	0.297013	0.229853	0.116418	11.8513	-0.138191	-0.123617	G1	Cancer	2417	0
313	1949	Tumor	Prostate																			HNSCC18_P4_G02_S74_comb	0.278881	0.24887	0.11958	12.2384	-0.138136	-0.154063	G1	Cancer	2513	0
314	2039	Tumor	Prostate																			HNSCC18_P4_G11_S83_comb	0.51537	0.804152	0.166574	14.7863	0.252711	0.672848	G2M	Cancer	6372	2.7887
315	2989	Tumor	Prostate																			HNSCC18_P4_H01_S85_comb	0.423098	0.602423	0.153998	13.3573	0.531605	-0.0247343	S	Cancer	6027	0
316	630	Tumor	Prostate																			HNSCC18_P4_H04_S88_comb	0.496067	0.610116	0.159008	15.2353	0.681499	0.34986	S	Cancer	4844	2.3528
317	2888	Tumor	Prostate																			HNSCC18_P4_H08_S92_comb	0.320074	0.304976	0.117161	11.7197	-0.126003	-0.1086	G1	Cancer	4706	0
318	726	Tumor	Prostate																			HNSCC18_P4_H10_S94_comb	0.478471	0.604523	0.155974	14.4188	0.145185	0.583019	G2M	Cancer	5813	0.0071955
319	2437	Tumor	Prostate																			HNSCC18_P4_H11_S95_comb	0.40949	0.548677	0.136593	13.1134	-0.0810419	-0.168593	G1	Cancer	5682	0
320	1834	Tumor	Prostate																			HNSCC18_P4_H12_S96_comb	0.329576	0.430116	0.140764	11.9997	-0.162849	-0.120862	G1	Cancer	4894	0
321	1659	Tumor	Prostate																			HNSCC18_P7_A01_S97_comb	0.289582	0.21625	0.123391	11.9503	-0.14613	-0.127362	G1	Normal	2887	0
322	2915	Tumor	Prostate																			HNSCC18_P7_A02_S98_comb	0.406875	0.409597	0.125545	13.24	-0.0726974	-0.180125	G1	Normal	4202	0
323	893	Tumor	Prostate																			HNSCC18_P7_A03_S99_comb	0.415674	0.378914	0.145497	13.1998	-0.0751569	-0.0850759	G1	Normal	4554	0
324	1083	Tumor	Prostate																			HNSCC18_P7_A04_S100_comb	0.281018	0.172587	0.121218	11.4547	-0.0590541	-0.113101	G1	Normal	3166	0
325	1297	Tumor	Prostate																			HNSCC18_P7_A05_S101_comb	0.356845	0.548417	0.136156	12.4291	-0.0371619	-0.132276	G1	Cancer	5837	0
326	2025	Tumor	Prostate																			HNSCC18_P7_A07_S103_comb	0.41644	0.203104	0.145385	14.2271	-0.00719211	-0.0810104	G1	Normal	2242	0
327	2471	Tumor	Prostate																			HNSCC18_P7_A10_S106_comb	0.369898	0.568736	0.133857	12.3059	-0.0554569	-0.137411	G1	Normal	6607	0
328	570	Tumor	Prostate																			HNSCC18_P7_A11_S107_comb	0.330834	0.524782	0.130199	12.3491	-0.0727826	-0.0538503	G1	Normal	2570	0
329	875	Tumor	Prostate																			HNSCC18_P7_A12_S108_comb	0.21989	0.299831	0.103646	10.7286	-0.0667032	-0.0757972	G1	Normal	2510	0
330	1055	Tumor	Prostate																			HNSCC18_P7_B01_S109_comb	0.423708	0.225139	0.15499	13.9048	-0.102021	-0.144879	G1	Normal	3553	0
331	1100	Tumor	Prostate																			HNSCC18_P7_B02_S110_comb	0.278847	0.701621	0.122495	11.9158	-0.0464325	-0.146722	G1	Normal	3857	0
332	3398	Tumor	Prostate																			HNSCC18_P7_B03_S111_comb	0.368396	0.297396	0.13661	12.8087	-0.140834	-0.142546	G1	Normal	3040	0
333	1480	Tumor	Prostate																			HNSCC18_P7_B04_S112_comb	0.516466	0.323272	0.168395	14.7176	0.0219668	0.894713	G2M	Cancer	5752	2.7146
334	3938	Tumor	Prostate																			HNSCC18_P7_B05_S113_comb	0.397444	0.527966	0.142559	13.1404	-0.19895	-0.165608	G1	Normal	5328	0
335	3641	Tumor	Prostate																			HNSCC18_P7_B06_S114_comb	0.425677	0.401434	0.15564	13.6594	-0.186456	-0.0557911	G1	Normal	3814	0
336	5787	Tumor	Prostate																			HNSCC18_P7_B07_S115_comb	0.405867	0.425095	0.154536	13.6821	-0.147267	-0.146813	G1	Normal	3896	0
337	2234	Tumor	Prostate																			HNSCC18_P7_B08_S116_comb	0.392306	0.342971	0.144518	13.5022	-0.0774244	-0.175609	G1	Normal	3249	0
338	686	Tumor	Prostate																			HNSCC18_P7_B09_S117_comb	0.38258	0.469138	0.146531	13.9281	-0.095226	-0.078838	G1	Normal	2792	0
339	906	Tumor	Prostate																			HNSCC18_P7_B11_S119_comb	0.366442	0.181522	0.128868	13.2253	-0.099093	-0.0664128	G1	Normal	3564	0
340	2059	Tumor	Prostate																			HNSCC18_P7_B12_S120_comb	0.400815	0.220158	0.141932	13.6085	-0.0713618	-0.149301	G1	Normal	3717	0
341	1695	Tumor	Prostate																			HNSCC18_P7_C03_S123_comb	0.353332	0.159211	0.136413	12.8289	-0.0751454	-0.0167487	G1	Normal	2844	0
342	2824	Tumor	Prostate																			HNSCC18_P7_C04_S124_comb	0.411974	0.403946	0.141559	13.2464	-0.155574	-0.124594	G1	Normal	4293	0
343	2137	Tumor	Prostate																			HNSCC18_P7_C05_S125_comb	0.310149	0.214675	0.133519	12.3682	-0.170991	-0.17148	G1	Normal	5227	0
344	1613	Tumor	Prostate																			HNSCC18_P7_C06_S126_comb	0.370201	0.51063	0.133987	12.2412	-0.0785511	-0.160925	G1	Normal	3223	0
345	1299	Tumor	Prostate																			HNSCC18_P7_C07_S127_comb	0.353447	0.365402	0.122331	13.0629	-0.198504	-0.153958	G1	Normal	3427	0
346	1066	Tumor	Prostate																			HNSCC18_P7_C08_S128_comb	0.379065	0.372114	0.142352	12.5893	-0.110564	-0.186653	G1	Normal	3945	0
347	1018	Tumor	Prostate																			HNSCC18_P7_C09_S129_comb	0.376506	0.442276	0.134241	12.9026	-0.127574	-0.0990933	G1	Normal	2562	0
348	1112	Tumor	Prostate																			HNSCC18_P7_C11_S131_comb	0.306734	0.339085	0.127993	11.5747	-0.18855	-0.104417	G1	Normal	3645	0
349	754	Tumor	Prostate																			HNSCC18_P7_C12_S132_comb	0.320288	0.241973	0.124437	12.1944	-0.0760542	-0.037457	G1	Normal	2324	0
350	3530	Tumor	Prostate																			HNSCC18_P7_D01_S133_comb	0.35683	0.41741	0.140858	13.0658	-0.0539927	-0.19529	G1	Normal	3877	0
351	3710	Tumor	Prostate																			HNSCC18_P7_D06_S138_comb	0.260562	0.283848	0.112492	11.5042	-0.201952	-0.18553	G1	Normal	4455	0
352	731	Tumor	Prostate																			HNSCC18_P7_D07_S139_comb	0.369785	0.222044	0.135544	13.0069	-0.0577784	-0.149264	G1	Normal	3273	0
353	3062	Tumor	Prostate																			HNSCC18_P7_D11_S143_comb	0.351941	0.686962	0.137326	12.0843	-0.195189	-0.135974	G1	Cancer	4301	0
354	1511	Tumor	Prostate																			HNSCC18_P7_D12_S144_comb	0.325137	0.289232	0.128547	12.3844	-0.0982124	-0.17945	G1	Normal	3450	0
355	1111	Tumor	Prostate																			HNSCC18_P7_E01_S145_comb	0.294565	0.359299	0.117258	11.6738	-0.0772921	-0.173456	G1	Normal	3731	0
356	1788	Tumor	Prostate																			HNSCC18_P7_E04_S148_comb	0.36897	0.261144	0.132883	12.716	-0.169921	-0.200293	G1	Normal	5030	0
357	1543	Tumor	Prostate																			HNSCC18_P7_E05_S149_comb	0.36075	0.44976	0.140701	12.323	-0.104095	-0.0947	G1	Normal	5304	0
358	2477	Tumor	Prostate																			HNSCC18_P7_E06_S150_comb	0.432206	0.593251	0.159054	13.1018	-0.125253	-0.193735	G1	Cancer	6309	0
359	1128	Tumor	Prostate																			HNSCC18_P7_E09_S153_comb	0.371981	0.529677	0.135068	12.3197	-0.122066	-0.154348	G1	Normal	5920	0
360	1345	Tumor	Prostate																			HNSCC18_P7_E11_S155_comb	0.392237	0.422606	0.141986	12.8948	-0.195497	-0.178643	G1	Cancer	4320	0
361	1603	Tumor	Prostate																			HNSCC18_P7_F01_S157_comb	0.337884	0.332861	0.125633	12.0135	-0.0600037	-0.0988535	G1	Normal	3962	0
362	1638	Tumor	Prostate																			HNSCC18_P7_F07_S163_comb	0.291501	0.283098	0.119978	11.7226	-0.0750632	-0.178702	G1	Normal	3411	0
363	3019	Tumor	Prostate																			HNSCC18_P7_F11_S167_comb	0.421907	0.317548	0.14548	13.8521	-0.152127	-0.115615	G1	Normal	2891	0
364	2487	Tumor	Prostate																			HNSCC18_P7_F12_S168_comb	0.452504	0.460849	0.156108	14.2163	-0.125253	-0.188009	G1	Normal	4079	0
365	2363	Tumor	Prostate																			HNSCC18_P7_G01_S169_comb	0.300729	0.656396	0.129239	12.4857	-0.078172	-0.0831445	G1	Normal	3577	0
366	1927	Tumor	Prostate																			HNSCC18_P7_G02_S170_comb	0.402673	0.407323	0.13438	13.408	-0.122612	-0.0571601	G1	Normal	4006	0
367	1632	Tumor	Prostate																			HNSCC18_P7_G03_S171_comb	0.365078	0.667973	0.119377	12.5207	-0.119369	-0.148918	G1	Normal	5060	0
368	2110	Tumor	Prostate																			HNSCC18_P7_G04_S172_comb	0.347668	0.373507	0.123416	12.4167	-0.0712454	-0.185827	G1	Normal	4216	0
369	1850	Tumor	Prostate																			HNSCC18_P7_G05_S173_comb	0.395666	0.267265	0.140949	13.1361	-0.138755	-0.196576	G1	Normal	5384	0
370	2583	Tumor	Prostate																			HNSCC18_P7_G07_S175_comb	0.225549	0.18783	0.110139	10.6217	-0.159538	-0.0928489	G1	Normal	2571	0
371	2119	Tumor	Prostate																			HNSCC18_P7_G09_S177_comb	0.375389	0.341657	0.144199	12.505	-0.186839	-0.072259	G1	Normal	3961	0
372	1092	Tumor	Prostate																			HNSCC18_P7_G10_S178_comb	0.367395	0.229247	0.139652	13.4731	-0.00305191	-0.0527198	G1	Normal	2441	0
373	2341	Tumor	Prostate																			HNSCC18_P7_G12_S180_comb	0.475666	0.255911	0.162125	14.9805	-0.129839	-0.070577	G1	Normal	2730	0
374	1082	Tumor	Prostate																			HNSCC18_P7_H01_S181_comb	0.349138	0.58356	0.128604	12.1865	-0.115923	-0.0911022	G1	Normal	3902	0
375	2308	Tumor	Prostate																			HNSCC18_P7_H02_S182_comb	0.376255	0.320045	0.138214	12.9132	-0.00249958	-0.11075	G1	Normal	4291	0
376	3334	Tumor	Prostate																			HNSCC18_P7_H06_S186_comb	0.379449	0.411639	0.13476	12.8161	-0.104215	-0.08393	G1	Normal	4470	0
377	954	Tumor	Prostate																			HNSCC18_P7_H07_S187_comb	0.366619	0.2932	0.142676	13.8292	-0.0786686	-0.0940601	G1	Normal	2573	0
378	767	Tumor	Prostate																			HNSCC18_P7_H10_S190_comb	0.382402	0.510956	0.146417	12.8413	-0.259657	-0.227422	G1	Cancer	5445	0
379	2336	Tumor	Prostate																			HNSCC18_P7_H11_S191_comb	0.299535	0.425506	0.116328	12.178	-0.163559	-0.20834	G1	Cancer	4227	0
380	2245	Tumor	Prostate																			HNSCC20_P1_A01_S1_comb	0.329818	0.364479	0.125328	11.5199	-0.0259913	-0.118481	G1	Cancer	4932	0
381	3306	Tumor	Prostate																			HNSCC20_P1_A02_S2_comb	0.368801	0.543141	0.137351	12.168	-0.103797	-0.100334	G1	Cancer	6291	0
382	2456	Tumor	Prostate																			HNSCC20_P1_A04_S4_comb	0.336607	0.282203	0.129127	11.9957	-0.094602	-0.124941	G1	Cancer	3474	0
383	1164	Tumor	Prostate																			HNSCC20_P1_A05_S5_comb	0.419683	0.61243	0.135384	12.8146	-0.105626	-0.0743314	G1	Cancer	6564	0
384	985	Tumor	Prostate																			HNSCC20_P1_A07_S7_comb	0.385786	0.4391	0.138856	12.9678	-0.114511	-0.140644	G1	Cancer	4726	0
385	1342	Tumor	Prostate																			HNSCC20_P1_A08_S8_comb	0.464351	0.695241	0.149511	14.018	0.542797	0.31973	S	Cancer	6327	0.38515
386	1041	Tumor	Prostate																			HNSCC20_P1_A10_S10_comb	0.468222	0.689408	0.15547	13.9348	0.746752	0.410225	S	Cancer	6318	1.406
387	1983	Tumor	Prostate																			HNSCC20_P1_A11_S11_comb	0.372489	0.506714	0.138198	12.0536	-0.185399	-0.0216237	G1	Cancer	6210	0
388	2979	Tumor	Prostate																			HNSCC20_P1_A12_S12_comb	0.406672	0.209063	0.134534	13.0325	-0.0715244	-0.025588	G1	Normal	2527	0
389	3604	Tumor	Prostate																			HNSCC20_P1_B01_S13_comb	0.339897	0.48944	0.125331	11.8934	-0.159368	-0.0880288	G1	Cancer	5826	0
390	2060	Tumor	Prostate																			HNSCC20_P1_B02_S14_comb	0.286783	0.433943	0.12139	11.4251	-0.161342	-0.104718	G1	Cancer	5335	0
391	1624	Tumor	Prostate																			HNSCC20_P1_B03_S15_comb	0.490969	0.644938	0.14295	14.4096	0.810852	0.352754	S	Cancer	5617	0
392	1030	Tumor	Prostate																			HNSCC20_P1_B04_S16_comb	0.544027	0.746423	0.166333	14.5901	0.807612	0.203455	S	Cancer	6554	0
393	1744	Tumor	Prostate																			HNSCC20_P1_B05_S17_comb	0.384442	0.54463	0.139562	12.6579	-0.0544472	-0.0998175	G1	Cancer	5835	0
394	1047	Tumor	Prostate																			HNSCC20_P1_B07_S19_comb	0.556073	0.828901	0.165152	14.9439	0.337004	0.513548	G2M	Cancer	6846	0
395	983	Tumor	Prostate																			HNSCC20_P1_B08_S20_comb	0.318422	0.443329	0.129461	11.9504	-0.137888	-0.0947811	G1	Cancer	5464	0
396	519	Tumor	Prostate																			HNSCC20_P1_B09_S21_comb	0.355713	0.527097	0.122383	12.1453	-0.144131	-0.12058	G1	Cancer	5894	0
397	3773	Tumor	Prostate																			HNSCC20_P1_B11_S23_comb	0.525459	0.804133	0.15752	14.3508	0.26068	0.666352	G2M	Cancer	7082	1.8311
398	864	Tumor	Prostate																			HNSCC20_P1_B12_S24_comb	0.331691	0.379292	0.122673	11.5494	-0.11237	-0.0992802	G1	Cancer	4949	0
399	4529	Tumor	Prostate																			HNSCC20_P1_C02_S26_comb	0.51988	0.749658	0.163282	14.3813	0.753027	0.151193	S	Cancer	6537	2.8703
400	1254	Tumor	Prostate																			HNSCC20_P1_C05_S29_comb	0.368892	0.517675	0.131481	12.3289	-0.01595	-0.0927704	G1	Cancer	5859	0
401	2197	Tumor	Prostate																			HNSCC20_P1_C06_S30_comb	0.502134	0.81873	0.160514	14.303	0.224399	0.832953	G2M	Cancer	7024	2.3277
402	2055	Tumor	Prostate																			HNSCC20_P1_C09_S33_comb	0.362546	0.581842	0.140303	12.2196	-0.161339	-0.160338	G1	Cancer	6647	0
403	2775	Tumor	Prostate																			HNSCC20_P1_C10_S34_comb	0.305042	0.4514	0.125613	11.3168	-0.0748147	-0.179954	G1	Cancer	5953	0
404	2582	Tumor	Prostate																			HNSCC20_P1_C11_S35_comb	0.374	0.562135	0.142771	12.9404	-0.114738	-0.070492	G1	Cancer	5470	0.044044
405	2564	Tumor	Prostate																			HNSCC20_P1_C12_S36_comb	0.375305	0.457312	0.135468	12.838	-0.101829	-0.0727348	G1	Cancer	4724	0
406	3011	Tumor	Prostate																			HNSCC20_P1_D01_S37_comb	0.376997	0.380283	0.137948	12.3637	-0.111071	-0.0386937	G1	Cancer	4475	0
407	3957	Tumor	Prostate																			HNSCC20_P1_D07_S43_comb	0.442488	0.709023	0.151833	13.2384	0.699108	0.0690688	S	Cancer	7064	0
408	797	Tumor	Prostate																			HNSCC20_P1_D08_S44_comb	0.559788	0.81046	0.165763	14.9193	0.183085	0.695076	G2M	Cancer	6825	1.2345
409	2006	Tumor	Prostate																			HNSCC20_P1_D09_S45_comb	0.478334	0.683259	0.166956	14.286	0.288126	0.542277	G2M	Cancer	5903	2.6549
410	1414	Tumor	Prostate																			HNSCC20_P1_D10_S46_comb	0.463545	0.786615	0.145202	13.7733	0.669788	0.217279	S	Cancer	6922	0
411	741	Tumor	Prostate																			HNSCC20_P1_D12_S48_comb	0.32315	0.468702	0.125267	11.8932	-0.0963521	-0.104439	G1	Cancer	5607	0
412	1005	Tumor	Prostate																			HNSCC20_P1_E02_S50_comb	0.35517	0.577713	0.135581	12.179	-0.0914617	-0.0263788	G1	Cancer	6376	0
413	2180	Tumor	Prostate																			HNSCC20_P1_E05_S53_comb	0.336193	0.372055	0.123408	11.6331	-0.129222	-0.0747623	G1	Cancer	5180	0
414	1706	Tumor	Prostate																			HNSCC20_P1_E07_S55_comb	0.343267	0.546326	0.122373	11.7282	-0.164998	-0.111217	G1	Cancer	6742	0
415	2161	Tumor	Prostate																			HNSCC20_P1_E09_S57_comb	0.527785	0.822287	0.16067	14.3114	0.656957	0.225394	S	Cancer	7170	0
416	1534	Tumor	Prostate																			HNSCC20_P1_E10_S58_comb	0.365059	0.619374	0.131007	12.2856	-0.0461186	-0.0834201	G1	Cancer	6833	0
417	1170	Tumor	Prostate																			HNSCC20_P1_F02_S62_comb	0.43608	0.718466	0.148447	13.6467	0.536579	0.138186	S	Cancer	6534	0
418	1768	Tumor	Prostate																			HNSCC20_P1_F03_S63_comb	0.493846	0.78758	0.156021	14.1701	0.657959	0.242531	S	Cancer	6833	0
419	2150	Tumor	Prostate																			HNSCC20_P1_F08_S68_comb	0.472799	0.704425	0.138219	13.6202	0.778036	0.289179	S	Cancer	6857	0
420	2529	Tumor	Prostate																			HNSCC20_P1_F09_S69_comb	0.336816	0.227134	0.118208	11.204	-0.168077	-0.0973673	G1	Cancer	3317	0
421	2644	Tumor	Prostate																			HNSCC20_P1_F10_S70_comb	0.300336	0.326529	0.119507	11.6195	-0.138887	-0.114066	G1	Cancer	4086	0
422	1612	Tumor	Prostate																			HNSCC20_P1_F12_S72_comb	0.319653	0.415049	0.121132	11.9794	-0.120466	-0.0875126	G1	Cancer	4499	0
423	1518	Tumor	Prostate																			HNSCC20_P1_G01_S73_comb	0.319468	0.375118	0.120122	11.5077	-0.0324774	-0.111832	G1	Cancer	5183	0
424	3076	Tumor	Prostate																			HNSCC20_P1_G04_S76_comb	0.550168	0.839823	0.158875	14.2802	0.6973	0.445671	S	Cancer	7561	1.8053
425	1753	Tumor	Prostate																			HNSCC20_P1_G05_S77_comb	0.352154	0.530307	0.131651	12.1435	-0.0741795	-0.0415501	G1	Cancer	6213	0
426	2015	Tumor	Prostate																			HNSCC20_P1_G06_S78_comb	0.375378	0.621846	0.137497	12.2058	-0.111755	-0.1116	G1	Cancer	7281	0
427	915	Tumor	Prostate																			HNSCC20_P1_G07_S79_comb	0.392848	0.473195	0.140284	13.0719	-0.0696324	-0.0527719	G1	Cancer	4770	0
428	612	Tumor	Prostate																			HNSCC20_P1_G09_S81_comb	0.436117	0.644947	0.14664	13.6933	0.675492	0.0289607	S	Cancer	5946	0.77568
429	2349	Tumor	Prostate																			HNSCC20_P1_G10_S82_comb	0.357284	0.569986	0.135004	12.0372	-0.0858843	-0.0631952	G1	Cancer	6762	0
430	3499	Tumor	Prostate																			HNSCC20_P1_G11_S83_comb	0.39456	0.529061	0.130459	12.7973	-0.138544	-0.108654	G1	Cancer	5479	0
431	1212	Tumor	Prostate																			HNSCC20_P1_H02_S86_comb	0.317072	0.469902	0.122854	12.3215	-0.0473374	-0.0774044	G1	Cancer	4753	0
432	2038	Tumor	Prostate																			HNSCC20_P1_H06_S90_comb	0.34726	0.393374	0.114685	11.9797	-0.110938	-0.0703354	G1	Cancer	4707	0
433	1247	Tumor	Prostate																			HNSCC20_P1_H07_S91_comb	0.483959	0.718474	0.160442	14.2425	0.848825	0.324135	S	Cancer	6047	0
434	2709	Tumor	Prostate																			HNSCC20_P1_H08_S92_comb	0.521747	0.827398	0.159785	14.1419	0.662865	0.4595	S	Cancer	7420	1.984
435	4638	Tumor	Prostate																			HNSCC20_P1_H10_S94_comb	0.499734	0.797443	0.144585	13.9032	0.71608	0.11233	S	Cancer	7228	0.43616
436	2972	Tumor	Prostate																			HNSCC20_P1_H11_S95_comb	0.565764	0.852612	0.175383	14.738	0.68789	0.320396	S	Cancer	7221	0.46884
437	2646	Tumor	Prostate																			HNSCC20_P1_H12_S96_comb	0.520851	0.822971	0.159499	14.481	0.23018	0.657069	G2M	Cancer	6998	1.1557
438	912	Tumor	Prostate																			HNSCC20_P11_A03_S195_comb	0.322429	0.389036	0.114067	11.5684	-0.161373	-0.168234	G1	Cancer	4823	0
439	1468	Tumor	Prostate																			HNSCC20_P11_A04_S196_comb	0.35749	0.30493	0.136969	12.4992	-0.0799932	-0.104898	G1	Cancer	3680	0
440	2052	Tumor	Prostate																			HNSCC20_P11_A07_S199_comb	0.31649	0.325969	0.132782	11.5071	-0.0659747	-0.144574	G1	Cancer	4527	0
441	1762	Tumor	Prostate																			HNSCC20_P11_A08_S200_comb	0.346141	0.38974	0.128997	12.3647	-0.0507909	-0.123366	G1	Cancer	4414	0
442	1175	Tumor	Prostate																			HNSCC20_P11_A12_S204_comb	0.506986	0.576241	0.179445	15.4414	0.323495	0.748146	G2M	Cancer	4525	0
443	2307	Tumor	Prostate																			HNSCC20_P11_B01_S205_comb	0.554042	0.84737	0.181224	15.2727	0.29627	0.806733	G2M	Cancer	6620	2.9855
444	3723	Tumor	Prostate																			HNSCC20_P11_B02_S206_comb	0.390091	0.508515	0.148439	14.0054	0.042959	0.555169	G2M	Cancer	4037	0
445	3110	Tumor	Prostate																			HNSCC20_P11_B03_S207_comb	0.467104	0.678087	0.148029	14.3954	0.307304	0.64086	G2M	Cancer	5580	1.6452
446	3429	Tumor	Prostate																			HNSCC20_P11_B05_S209_comb	0.350818	0.452444	0.130977	12.0776	-0.122644	-0.162949	G1	Cancer	5367	0
447	4610	Tumor	Prostate																			HNSCC20_P11_B06_S210_comb	0.376669	0.510364	0.141531	12.8563	-0.0449274	-0.0331232	G1	Cancer	5224	0
448	1748	Tumor	Prostate																			HNSCC20_P11_B08_S212_comb	0.307119	0.472352	0.12833	11.7183	-0.141263	-0.00952586	G1	Cancer	5441	0
449	2509	Tumor	Prostate																			HNSCC20_P11_B10_S214_comb	0.517826	0.799821	0.146401	14.9764	0.733518	0.490068	S	Cancer	6001	2.4888
450	514	Tumor	Prostate																			HNSCC20_P11_B11_S215_comb	0.492934	0.667767	0.157727	14.7322	0.323903	0.581081	G2M	Cancer	5396	0
451	2850	Tumor	Prostate																			HNSCC20_P11_B12_S216_comb	0.321277	0.31356	0.115118	11.5551	-0.0922681	-0.0887969	G1	Cancer	4324	0
452	2294	Tumor	Prostate																			HNSCC20_P11_C05_S221_comb	0.335697	0.419432	0.138623	12.0678	-0.135437	-0.116822	G1	Cancer	5242	0
453	1278	Tumor	Prostate																			HNSCC20_P11_C06_S222_comb	0.486636	0.763677	0.175434	14.4811	0.198498	0.730022	G2M	Cancer	6371	1.1204
454	2482	Tumor	Prostate																			HNSCC20_P11_C07_S223_comb	0.334165	0.448992	0.134675	12.308	-0.133823	-0.117146	G1	Cancer	4726	0
455	2834	Tumor	Prostate																			HNSCC20_P11_C08_S224_comb	0.331188	0.446243	0.121963	11.9548	-0.14996	-0.176079	G1	Cancer	5382	0
456	1496	Tumor	Prostate																			HNSCC20_P11_C09_S225_comb	0.324599	0.536934	0.142616	12.1614	-0.0646434	-0.0542008	G1	Cancer	5857	0
457	2595	Tumor	Prostate																			HNSCC20_P11_C10_S226_comb	0.343621	0.416235	0.132382	12.339	-0.0380561	-0.0761143	G1	Cancer	4601	0
458	2739	Tumor	Prostate																			HNSCC20_P11_C11_S227_comb	0.504511	0.786828	0.173004	14.7499	0.540054	0.708775	G2M	Cancer	6154	3.0346
459	2738	Tumor	Prostate																			HNSCC20_P11_C12_S228_comb	0.484519	0.808409	0.16062	14.0038	0.202641	0.745344	G2M	Cancer	7111	1.5145
460	1943	Tumor	Prostate																			HNSCC20_P11_D06_S234_comb	0.407259	0.451829	0.141182	13.2564	-0.122683	-0.0314528	G1	Cancer	4769	0
461	616	Tumor	Prostate																			HNSCC20_P11_D12_S240_comb	0.301334	0.427869	0.122627	12.0909	-0.0897355	-0.120464	G1	Cancer	4431	0
462	2844	Tumor	Prostate																			HNSCC20_P11_E01_S241_comb	0.347334	0.523231	0.131995	12.4031	-0.126894	-0.0697065	G1	Cancer	5796	0
463	1444	Tumor	Prostate																			HNSCC20_P11_E02_S242_comb	0.274413	0.48953	0.12431	12.129	-0.1437	-0.159301	G1	Cancer	5093	0
464	2876	Tumor	Prostate																			HNSCC20_P11_E03_S243_comb	0.29952	0.472115	0.137701	11.732	-0.0770103	-0.0746274	G1	Cancer	5699	0
465	2620	Tumor	Prostate																			HNSCC20_P11_E04_S244_comb	0.257088	0.268182	0.127025	11.8235	-0.112992	-0.0924828	G1	Cancer	3422	0
466	965	Tumor	Prostate																			HNSCC20_P11_E05_S245_comb	0.356705	0.473196	0.123955	12.2235	-0.169812	-0.129173	G1	Cancer	5451	0
467	2489	Tumor	Prostate																			HNSCC20_P11_E07_S247_comb	0.390194	0.439528	0.137831	13.0503	-0.217118	-0.0619764	G1	Cancer	4674	0
468	2608	Tumor	Prostate																			HNSCC20_P11_E09_S249_comb	0.324051	0.440697	0.128256	12.2305	-0.0978496	-0.117618	G1	Cancer	4706	0
469	1660	Tumor	Prostate																			HNSCC20_P11_E10_S250_comb	0.312577	0.431303	0.135465	11.7213	-0.0673322	-0.0676874	G1	Cancer	5289	0
470	2415	Tumor	Prostate																			HNSCC20_P11_E11_S251_comb	0.266234	0.45629	0.118832	11.7998	-0.169583	-0.027818	G1	Cancer	4914	0
471	1395	Tumor	Prostate																			HNSCC20_P11_F01_S253_comb	0.331959	0.349874	0.119214	11.8521	-0.0852663	-0.178035	G1	Cancer	4494	0
472	1127	Tumor	Prostate																			HNSCC20_P11_F02_S254_comb	0.490269	0.75606	0.156569	14.2919	0.316975	0.74691	G2M	Cancer	6367	2.0824
473	931	Tumor	Prostate																			HNSCC20_P11_F04_S256_comb	0.374229	0.326658	0.131924	12.5471	-0.0928377	-0.127306	G1	Cancer	3772	0
474	941	Tumor	Prostate																			HNSCC20_P11_F05_S257_comb	0.260058	0.196369	0.104895	10.5762	-0.093707	-0.122043	G1	Cancer	3730	0
475	1788	Tumor	Prostate																			HNSCC20_P11_F07_S259_comb	0.291768	0.451913	0.117535	11.8717	-0.181434	-0.0986609	G1	Cancer	5197	0
476	1336	Tumor	Prostate																			HNSCC20_P11_F08_S260_comb	0.338382	0.476354	0.135561	12.0792	-0.054321	-0.120884	G1	Cancer	5618	0
477	1203	Tumor	Prostate																			HNSCC20_P11_F10_S262_comb	0.339955	0.315002	0.121823	12.1351	-0.0779939	-0.0559957	G1	Cancer	3835	0
478	1098	Tumor	Prostate																			HNSCC20_P11_F11_S263_comb	0.292905	0.314927	0.128747	12.1986	-0.0271663	-0.0356263	G1	Cancer	3604	0
479	1079	Tumor	Prostate																			HNSCC20_P11_G01_S265_comb	0.334969	0.429737	0.130854	11.9679	-0.141598	-0.118623	G1	Cancer	5150	0
480	1555	Tumor	Prostate																			HNSCC20_P11_G02_S266_comb	0.426194	0.598969	0.153466	13.6589	0.561552	0.114158	S	Cancer	5395	0
481	3042	Tumor	Prostate																			HNSCC20_P11_G03_S267_comb	0.318144	0.51271	0.133015	11.8549	-0.041078	-0.0366786	G1	Cancer	5968	0
482	1708	Tumor	Prostate																			HNSCC20_P11_G04_S268_comb	0.324334	0.549686	0.127957	12.0042	-0.050814	-0.130252	G1	Cancer	6166	0
483	1958	Tumor	Prostate																			HNSCC20_P11_G05_S269_comb	0.393751	0.458384	0.13039	12.7021	-0.111918	-0.0228919	G1	Cancer	5215	0
484	1761	Tumor	Prostate																			HNSCC20_P11_G08_S272_comb	0.343452	0.364579	0.119922	12.3582	-0.14309	-0.0505725	G1	Cancer	4241	0
485	4445	Tumor	Prostate																			HNSCC20_P11_G09_S273_comb	0.291773	0.369005	0.0986926	11.1492	-0.0910075	-0.215946	G1	Cancer	5074	0
486	2670	Tumor	Prostate																			HNSCC20_P11_G10_S274_comb	0.500704	0.696016	0.167875	14.3778	0.268305	0.717916	G2M	Cancer	6254	1.7553
487	2708	Tumor	Prostate																			HNSCC20_P11_H01_S277_comb	0.272791	0.254104	0.118018	11.5944	-0.0805224	-0.0134877	G1	Cancer	3064	0
488	3381	Tumor	Prostate																			HNSCC20_P11_H02_S278_comb	0.5133	0.651725	0.162295	14.8362	0.742474	0.407741	S	Cancer	5579	0
579	752	Tumor	Prostate																			HNSCC20_P11_H04_S280_comb	0.360479	0.387407	0.134258	12.8312	-0.133242	-0.167842	G1	Normal	3733	0
580	1545	Tumor	Prostate																			HNSCC20_P11_H06_S282_comb	0.351849	0.38005	0.133422	12.1425	-0.000779596	-0.0897377	G1	Cancer	4511	0
581	2206	Tumor	Prostate																			HNSCC20_P11_H09_S285_comb	0.386994	0.43534	0.138225	12.9974	-0.129558	-0.0410948	G1	Cancer	4582	0
582	2199	Tumor	Prostate																			HNSCC20_P11_H10_S286_comb	0.311109	0.340322	0.109893	11.413	-0.00826587	-0.0321919	G1	Cancer	4729	0
583	2472	Tumor	Prostate																			HNSCC20_P11_H11_S287_comb	0.313336	0.490728	0.118023	12.2517	-0.119699	-0.0951287	G1	Cancer	5178	0
584	3037	Tumor	Prostate																			HNSCC20_P11_H12_S288_comb	0.464441	0.5978	0.160928	14.3762	0.828223	0.188298	S	Cancer	5162	0
585	4456	Tumor	Prostate																			HNSCC20_P12_A02_S290_comb	0.332549	0.394362	0.136158	12.5715	-0.0594573	-0.0815518	G1	Cancer	4159	0
586	931	Tumor	Prostate																			HNSCC20_P12_A04_S292_comb	0.357864	0.527455	0.127673	12.0527	-0.0754967	-0.0924806	G1	Cancer	6356	0
587	5282	Tumor	Prostate																			HNSCC20_P12_A05_S293_comb	0.318676	0.497531	0.12211	11.5178	-0.145606	-0.168828	G1	Cancer	6172	0.72509
588	4177	Tumor	Prostate																			HNSCC20_P12_A06_S294_comb	0.495827	0.83679	0.160002	13.581	0.0723525	0.697571	G2M	Cancer	8234	1.2485
589	2418	Tumor	Prostate																			HNSCC20_P12_A08_S296_comb	0.243991	0.232447	0.105072	10.4962	-0.0368877	-0.144236	G1	Cancer	3583	0
590	2995	Tumor	Prostate																			HNSCC20_P12_A09_S297_comb	0.520472	0.839412	0.162846	14.1649	0.310222	0.684102	G2M	Cancer	7595	1.4621
591	2074	Tumor	Prostate																			HNSCC20_P12_A10_S298_comb	0.569898	0.862412	0.171589	14.6166	0.327032	0.765045	G2M	Cancer	7548	0
592	3444	Tumor	Prostate																			HNSCC20_P12_A11_S299_comb	0.489353	0.661302	0.174729	14.6192	0.0122635	0.96046	G2M	Cancer	5529	3.438
593	3360	Tumor	Prostate																			HNSCC20_P12_B02_S302_comb	0.387722	0.572669	0.124971	12.1117	-0.062784	-0.147919	G1	Cancer	6889	0
594	1633	Tumor	Prostate																			HNSCC20_P12_B04_S304_comb	0.462283	0.706769	0.159578	13.9425	0.0944264	0.662821	G2M	Cancer	6387	0.53107
595	3982	Tumor	Prostate																			HNSCC20_P12_B08_S308_comb	0.536988	0.819351	0.174665	14.9435	0.119832	0.854928	G2M	Cancer	6481	2.3245
596	2108	Tumor	Prostate																			HNSCC20_P12_B09_S309_comb	0.300231	0.514562	0.12165	11.4327	-0.18407	-0.113347	G1	Cancer	6342	0
597	946	Tumor	Prostate																			HNSCC20_P12_B11_S311_comb	0.305743	0.472337	0.118527	11.8571	-0.122548	-0.0688223	G1	Cancer	5472	0
598	2514	Tumor	Prostate																			HNSCC20_P12_B12_S312_comb	0.337835	0.457472	0.124994	11.9949	-0.0286063	-0.127732	G1	Cancer	5473	0
599	4087	Tumor	Prostate																			HNSCC20_P12_C02_S314_comb	0.357812	0.579922	0.128784	12.1829	-0.184818	-0.0906486	G1	Cancer	6474	0
600	2407	Tumor	Prostate																			HNSCC20_P12_C09_S321_comb	0.295087	0.485946	0.121773	11.2706	-0.133558	-0.123718	G1	Cancer	6504	0
601	1247	Tumor	Prostate																			HNSCC20_P12_C10_S322_comb	0.385471	0.589725	0.139479	12.6528	-0.129296	-0.104523	G1	Cancer	6359	0
[truncated: 37,217 more rows]
