# Supplementary material for: Signature-scoring methods developed for bulk samples are not adequate for cancer single-cell RNA sequencing data
Source: eLife. 2022 Feb 25;11:e71994. doi: 10.7554/eLife.71994 (PMC8916770; doi:10.7554/eLife.71994)
Supplement: Figure 2—source data 1. [file elife-71994-fig2-data1.xlsx]

## Sheet: Figure 2
Figure 2A					Figure 2B					Figure 2C					Figure 2D
Gene Set size	Noise Levels	Recovery Percentage Up Signatures	Method		Gene Set size	Noise Levels	Recovery Percentage down Signatures	Method		Method	Percentage	Dataset	Cohen's d		Dataset	Method	Cohen's d	Sensitivity	Specificity	Accuracy
50	0	97.55	AUCell		50	20	100	AUCell		AUCell	2.28605	Astrocytoma	down		Astrocytoma	AUCell	down	0.868075	0.70073	0.828186
50	0	99.55	JASMINE		50	40	99.55	AUCell		JASMINE	1.2456	Astrocytoma	down		Astrocytoma	JASMINE	down	0.93261	0.987226	0.945629
50	0	98.15	SCSE		50	60	90.5	AUCell		SCSE	0	Astrocytoma	down		Astrocytoma	SCSE	down	0.998287	0.312044	0.834711
50	0	100	ssGSEA		50	80	40	AUCell		ssGSEA	41.6032	Astrocytoma	down		BRCA	AUCell	down	1	0.42735	0.752768
50	20	91.05	AUCell		50	0	100	AUCell		AUCell	0	BRCA	down		BRCA	JASMINE	down	0.876623	0.880342	0.878229
50	20	98.3	JASMINE		50	20	100	JASMINE		JASMINE	0.773746	BRCA	down		BRCA	SCSE	down	0.561688	0.692308	0.618081
50	20	96.15	SCSE		50	40	98.8	JASMINE		SCSE	62.0731	BRCA	down		ccRCC	AUCell	down	0.775393	0.437714	0.587675
50	20	99.75	ssGSEA		50	60	88.2	JASMINE		ssGSEA	95.8911	BRCA	down		ccRCC	JASMINE	down	0.761087	0.883429	0.829098
50	40	82.6	AUCell		50	80	37.05	JASMINE		AUCell	0.730029	ccRCC	down		ccRCC	SCSE	down	0.902718	0.678857	0.778272
50	40	84.4	JASMINE		50	0	99.9	JASMINE		JASMINE	3.35533	ccRCC	down		CRC	AUCell	down	0.775393	0.437714	0.587675
50	40	83.8	SCSE		50	20	94.25	SCSE		SCSE	15.2043	ccRCC	down		CRC	JASMINE	down	0.761087	0.883429	0.829098
50	40	92.75	ssGSEA		50	40	91.4	SCSE		ssGSEA	43.8018	ccRCC	down		CRC	SCSE	down	0.902718	0.678857	0.778272
50	60	68.65	AUCell		50	60	82.75	SCSE		AUCell	0	CRC	down		GBM(Darmanis et al)	AUCell	down	0.97	0.620879	0.838174
50	60	59.7	JASMINE		50	80	37.45	SCSE		JASMINE	0.90812	CRC	down		GBM(Darmanis et al)	JASMINE	down	0.813333	0.82967	0.819502
50	60	60.65	SCSE		50	0	94.9	SCSE		SCSE	65.0641	CRC	down		GBM(Darmanis et al)	SCSE	down	0.81	0.549451	0.711618
50	60	72.8	ssGSEA		50	20	82.95	ssGSEA		ssGSEA	41.3328	CRC	down		HNSC	AUCell	down	0.836588	0.390943	0.579634
50	80	35.2	AUCell		50	40	78.45	ssGSEA		AUCell	0	GBM(Darmanis et al)	down		HNSC	JASMINE	down	0.641316	0.966038	0.828547
50	80	18.3	JASMINE		50	60	60.25	ssGSEA		JASMINE	0.0133565	GBM(Darmanis et al)	down		HNSC	SCSE	down	0.981501	0.643019	0.786336
50	80	23	SCSE		50	80	22.15	ssGSEA		SCSE	6.65153	GBM(Darmanis et al)	down		GBM(Neftal et al)	AUCell	down	0.876416	0.764988	0.842939
50	80	44.55	ssGSEA		50	0	85.15	ssGSEA		ssGSEA	57.8603	GBM(Darmanis et al)	down		GBM(Neftal et al)	JASMINE	down	0.888774	0.980815	0.916427
100	0	100	AUCell		100	20	100	AUCell		AUCell	3.72447	HNSC	down		GBM(Neftal et al)	SCSE	down	0.99691	0.254197	0.773775
100	0	99.7	JASMINE		100	40	100	AUCell		JASMINE	1.73542	HNSC	down		LIHC	AUCell	down	0.859155	0.63662	0.700201
100	0	99.75	SCSE		100	60	99.25	AUCell		SCSE	0	HNSC	down		LIHC	JASMINE	down	0.93662	0.566197	0.672032
100	0	100	ssGSEA		100	80	60.95	AUCell		ssGSEA	30.4365	HNSC	down		LIHC	SCSE	down	0.584507	0.797183	0.736419
100	20	97.55	AUCell		100	0	100	AUCell		AUCell	1.64241	GBM(Neftal et al)	down		Melanoma	AUCell	down	0.838261	0.231788	0.493985
100	20	100	JASMINE		100	20	100	JASMINE		JASMINE	0.894645	GBM(Neftal et al)	down		Melanoma	JASMINE	down	0.815652	0.976159	0.906767
100	20	98.55	SCSE		100	40	100	JASMINE		SCSE	0	GBM(Neftal et al)	down		Melanoma	SCSE	down	0.998261	0.792053	0.881203
100	20	100	ssGSEA		100	60	99.05	JASMINE		ssGSEA	38.1893	GBM(Neftal et al)	down		Prostate	AUCell	down	0.988304	0.136752	0.496296
100	40	88.35	AUCell		100	80	64.65	JASMINE		AUCell	0	LIHC	down		Prostate	JASMINE	down	0.967836	0.989316	0.980247
100	40	96.45	JASMINE		100	0	100	JASMINE		JASMINE	0.854587	LIHC	down		Prostate	SCSE	down	0.0438596	0.873932	0.523457
100	40	92.45	SCSE		100	20	96.4	SCSE		SCSE	51.6491	LIHC	down		Astrocytoma	AUCell	up	0.605413	0.628	0.611345
100	40	99	ssGSEA		100	40	94.35	SCSE		ssGSEA	35.5722	LIHC	down		Astrocytoma	JASMINE	up	0.978632	0.458	0.841912
100	60	77.55	AUCell		100	60	91.95	SCSE		AUCell	4.48658	Melanoma	down		Astrocytoma	SCSE	up	0.878917	0.914	0.88813
100	60	76.55	JASMINE		100	80	59.35	SCSE		JASMINE	1.6157	Melanoma	down		BRCA	AUCell	up	0.951128	0.931915	0.938859
100	60	73.45	SCSE		100	0	97.05	SCSE		SCSE	0	Melanoma	down		BRCA	JASMINE	up	0.958647	0.140426	0.436141
100	60	82.5	ssGSEA		100	20	85.4	ssGSEA		ssGSEA	29.7102	Melanoma	down		BRCA	SCSE	up	0.364662	0.92766	0.724185
100	80	52.4	AUCell		100	40	81.8	ssGSEA		AUCell	0	Prostate	down		ccRCC	AUCell	up	0.838849	0.729387	0.794521
100	80	39	JASMINE		100	60	73.4	ssGSEA		JASMINE	0.133387	Prostate	down		ccRCC	JASMINE	up	0.942446	0.617336	0.810788
100	80	39.1	SCSE		100	80	31.45	ssGSEA		SCSE	54.1417	Prostate	down		ccRCC	SCSE	up	0.833094	0.653277	0.760274
100	80	58.4	ssGSEA		100	0	87.3	ssGSEA		ssGSEA	44.5645	Prostate	down		CRC	AUCell	up	0.838849	0.729387	0.794521
150	0	100	AUCell		150	20	100	AUCell		AUCell	10.4631	Astrocytoma	up		CRC	JASMINE	up	0.942446	0.617336	0.810788
150	0	100	JASMINE		150	40	100	AUCell		JASMINE	1.46542	Astrocytoma	up		CRC	SCSE	up	0.833094	0.653277	0.760274
150	0	100	SCSE		150	60	99.8	AUCell		SCSE	0.219812	Astrocytoma	up		GBM(Darmanis et al)	AUCell	up	0.86087	0.663636	0.764444
150	0	100	ssGSEA		150	80	73	AUCell		ssGSEA	11.313	Astrocytoma	up		GBM(Darmanis et al)	JASMINE	up	0.730435	0.836364	0.782222
150	20	99.6	AUCell		150	0	100	AUCell		AUCell	0	BRCA	up		GBM(Darmanis et al)	SCSE	up	0.791304	0.5	0.648889
150	20	100	JASMINE		150	20	100	JASMINE		JASMINE	0.333511	BRCA	up		HNSC	AUCell	up	0.90339	0.474255	0.738269
150	20	99.75	SCSE		150	40	100	JASMINE		SCSE	3.32177	BRCA	up		HNSC	JASMINE	up	0.944068	0.647696	0.830031
150	20	100	ssGSEA		150	60	99.85	JASMINE		ssGSEA	0.560299	BRCA	up		HNSC	SCSE	up	0.538983	0.878049	0.669447
150	40	92.5	AUCell		150	80	77.8	JASMINE		AUCell	40.6851	ccRCC	up		GBM(Neftal et al)	AUCell	up	0.674216	0.535897	0.618257
150	40	99	JASMINE		150	0	100	JASMINE		JASMINE	31.9107	ccRCC	up		GBM(Neftal et al)	JASMINE	up	0.968641	0.612821	0.824689
150	40	96.7	SCSE		150	20	96.75	SCSE		SCSE	22.0272	ccRCC	up		GBM(Neftal et al)	SCSE	up	0.829268	0.851282	0.838174
150	40	99.75	ssGSEA		150	40	95.85	SCSE		ssGSEA	41.022	ccRCC	up		LIHC	AUCell	up	0.921136	0.690821	0.830153
150	60	80.75	AUCell		150	60	93	SCSE		AUCell	0	CRC	up		LIHC	JASMINE	up	0.930599	0.700483	0.839695
150	60	81.55	JASMINE		150	80	69.95	SCSE		JASMINE	0.868056	CRC	up		LIHC	SCSE	up	0.77918	0.608696	0.711832
150	60	78	SCSE		150	0	97.65	SCSE		SCSE	11.6987	CRC	up		Melanoma	AUCell	up	0.78785	0.56785	0.719819
150	60	85.8	ssGSEA		150	20	86.6	ssGSEA		ssGSEA	1.60256	CRC	up		Melanoma	JASMINE	up	0.934579	0.697286	0.861201
150	80	59.4	AUCell		150	40	83.4	ssGSEA		AUCell	0	GBM(Darmanis et al)	up		Melanoma	SCSE	up	0.880374	0.734864	0.835378
150	80	51.4	JASMINE		150	60	77.4	ssGSEA		JASMINE	0	GBM(Darmanis et al)	up		Prostate	AUCell	up	0.644444	0.926882	0.848062
150	80	46.7	SCSE		150	80	35.25	ssGSEA		SCSE	19.1666	GBM(Darmanis et al)	up		Prostate	JASMINE	up	0.561111	0.922581	0.821705
150	80	63.85	ssGSEA		150	0	87.85	ssGSEA		ssGSEA	1.05516	GBM(Darmanis et al)	up		Prostate	SCSE	up	0.794444	0.150538	0.330233
200	0	100	AUCell		200	20	100	AUCell		AUCell	7.47564	HNSC	up
200	0	100	JASMINE		200	40	100	AUCell		JASMINE	1.62862	HNSC	up
200	0	100	SCSE		200	60	100	AUCell		SCSE	0.186891	HNSC	up
200	0	100	ssGSEA		200	80	80.75	AUCell		ssGSEA	18.7959	HNSC	up
200	20	99.8	AUCell		200	0	100	AUCell		AUCell	8.05181	GBM(Neftal et al)	up
200	20	100	JASMINE		200	20	100	JASMINE		JASMINE	0.921351	GBM(Neftal et al)	up
200	20	99.8	SCSE		200	40	100	JASMINE		SCSE	0.0133529	GBM(Neftal et al)	up
200	20	100	ssGSEA		200	60	100	JASMINE		ssGSEA	12.712	GBM(Neftal et al)	up
200	40	94.95	AUCell		200	80	85.5	JASMINE		AUCell	0	LIHC	up
200	40	99.65	JASMINE		200	0	100	JASMINE		JASMINE	0.440646	LIHC	up
200	40	98.45	SCSE		200	20	97.15	SCSE		SCSE	7.91828	LIHC	up
200	40	100	ssGSEA		200	40	96.3	SCSE		ssGSEA	1.90947	LIHC	up
200	60	82.1	AUCell		200	60	94.6	SCSE		AUCell	8.6794	Melanoma	up
200	60	83.65	JASMINE		200	80	75.35	SCSE		JASMINE	1.94953	Melanoma	up
200	60	80.05	SCSE		200	0	97.95	SCSE		SCSE	0.387235	Melanoma	up
200	60	87.25	ssGSEA		200	20	86.95	ssGSEA		ssGSEA	20.7905	Melanoma	up
200	80	62.4	AUCell		200	40	84.25	ssGSEA		AUCell	0	Prostate	up
200	80	60.1	JASMINE		200	60	78.45	ssGSEA		JASMINE	0.106709	Prostate	up
200	80	53.95	SCSE		200	80	41.8	ssGSEA		SCSE	3.49473	Prostate	up
200	80	67.05	ssGSEA		200	0	89.1	ssGSEA		ssGSEA	0.60024	Prostate	up
300	0	100	AUCell		300	20	100	AUCell
300	0	100	JASMINE		300	40	100	AUCell
300	0	100	SCSE		300	60	100	AUCell
300	0	100	ssGSEA		300	80	90.45	AUCell
300	20	100	AUCell		300	0	100	AUCell
300	20	100	JASMINE		300	20	100	JASMINE
300	20	99.95	SCSE		300	40	100	JASMINE
300	20	100	ssGSEA		300	60	100	JASMINE
300	40	97.8	AUCell		300	80	92.15	JASMINE
300	40	100	JASMINE		300	0	100	JASMINE
300	40	99.15	SCSE		300	20	98.4	SCSE
300	40	100	ssGSEA		300	40	96.95	SCSE
300	60	83.7	AUCell		300	60	95.55	SCSE
300	60	85.85	JASMINE		300	80	81.15	SCSE
300	60	83.65	SCSE		300	0	99.2	SCSE
300	60	89.7	ssGSEA		300	20	87.65	ssGSEA
300	80	65.9	AUCell		300	40	84.65	ssGSEA
300	80	65.2	JASMINE		300	60	78.75	ssGSEA
300	80	59.35	SCSE		300	80	45.9	ssGSEA
300	80	70.75	ssGSEA		300	0	89.8	ssGSEA
