# Supplementary material for: Signature-scoring methods developed for bulk samples are not adequate for cancer single-cell RNA sequencing data
Source: eLife. 2022 Feb 25;11:e71994. doi: 10.7554/eLife.71994 (PMC8916770; doi:10.7554/eLife.71994)
Supplement: Figure 3—source data 1. [file elife-71994-fig3-data1.xlsx]

## Sheet: Figure 3
Figure 3A
Method	Percentage	Cohen's d	Down Sampling Percent
AUCell	15.245	down	20
AUCell	18.1952	up	20
AUCell	6.2742	down	40
AUCell	10.7062	up	40
AUCell	0.961153	down	60
AUCell	4.80577	up	60
AUCell	0	down	80
AUCell	0.947931	up	80
JASMINE	1.64197	down	20
JASMINE	7.78267	up	20
JASMINE	1.46843	down	40
JASMINE	1.72207	up	40
JASMINE	1.16139	up	60
JASMINE	1.65532	down	60
JASMINE	0.867824	up	80
JASMINE	1.61549	down	80
SCSE	0	up	20
SCSE	0.387131	down	20
SCSE	0.186891	up	40
SCSE	0.921105	down	40
SCSE	0.520625	up	60
SCSE	2.70992	down	60
SCSE	0.574099	up	80
SCSE	2.79039	down	80
ssGSEA	16.4331	down	20
ssGSEA	43.4388	up	20
ssGSEA	24.4293	up	40
ssGSEA	25.9111	down	40
ssGSEA	14.0702	up	60
ssGSEA	35.3891	down	60
ssGSEA	8.18425	up	80
ssGSEA	42.9105	down	80
