# Supplementary material for: Signature-scoring methods developed for bulk samples are not adequate for cancer single-cell RNA sequencing data
Source: eLife journal article supplement (doi:10.7554/elife.71994), 2022-02-25

Figure 3-figure supplement 1

Percentage ● ● ● ● ●  
 $<10$  10-20 20-30 30-40  $>40$

● up ● down

**A**

Astrocytoma (Venteicher et al)

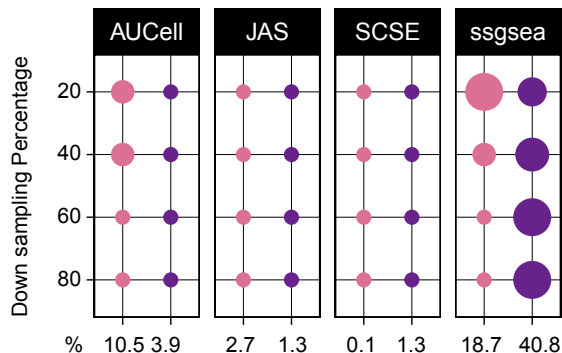

**B**

Melanoma (Tirosh et al)

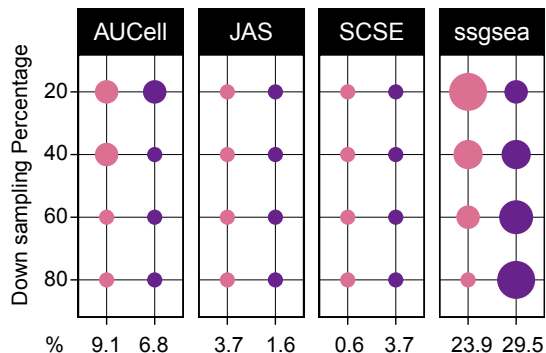

**C**

CRC (Lee et al)

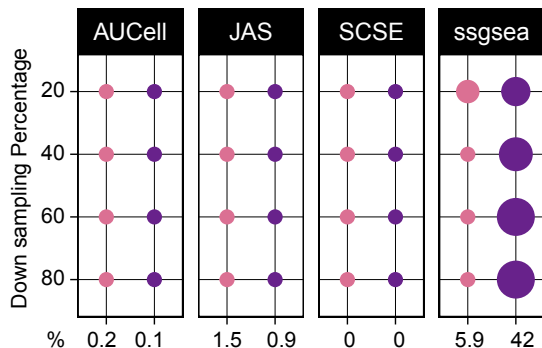

**D**

GBM (Neftali et al)

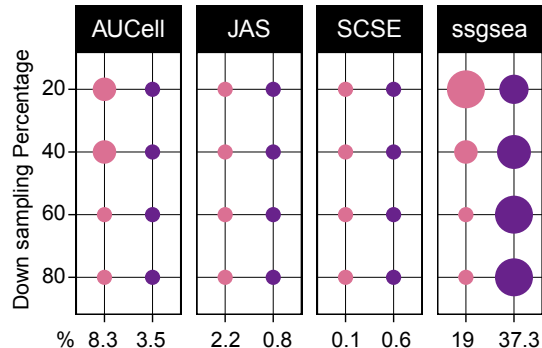

Supplement: supp [file elife-71994-supp-v1.zip]
