# Supplementary figures and images for: Signature-scoring methods developed for bulk samples are not adequate for cancer single-cell RNA sequencing data
Source: eLife journal article supplement (doi:10.7554/elife.71994), 2022-02-25

Figure 1-figure supplement 2

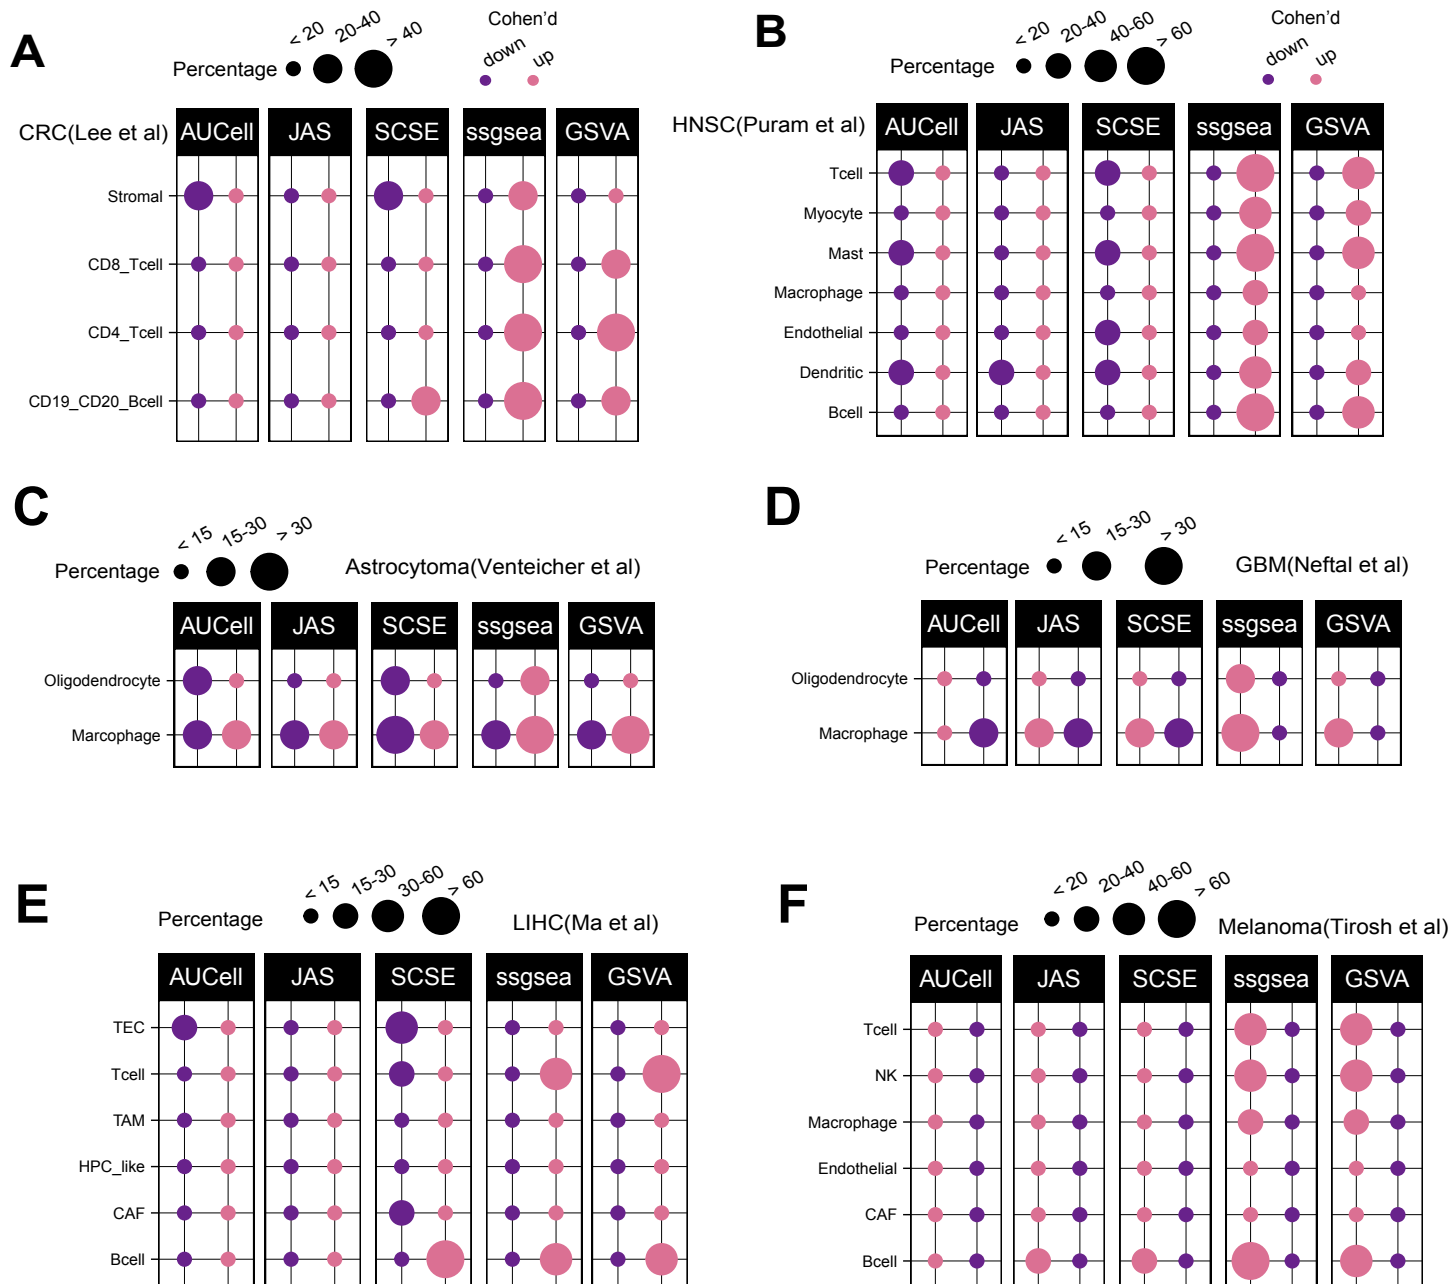

Supplement: supp [file elife-71994-supp-v1.zip]

Figure 3-figure supplement 2

**A**

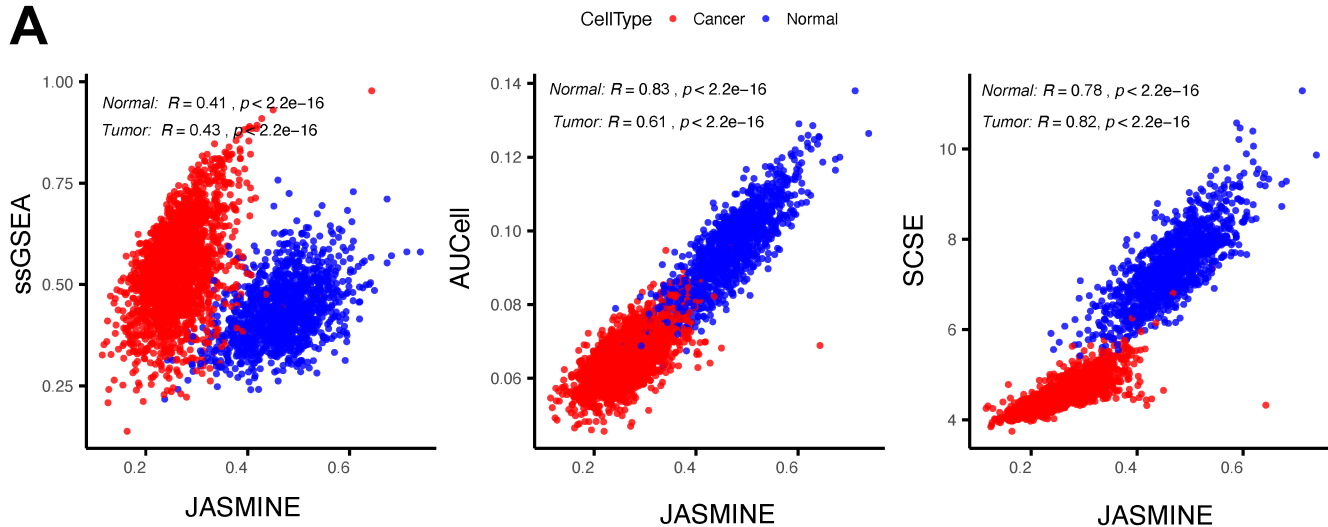

**B**

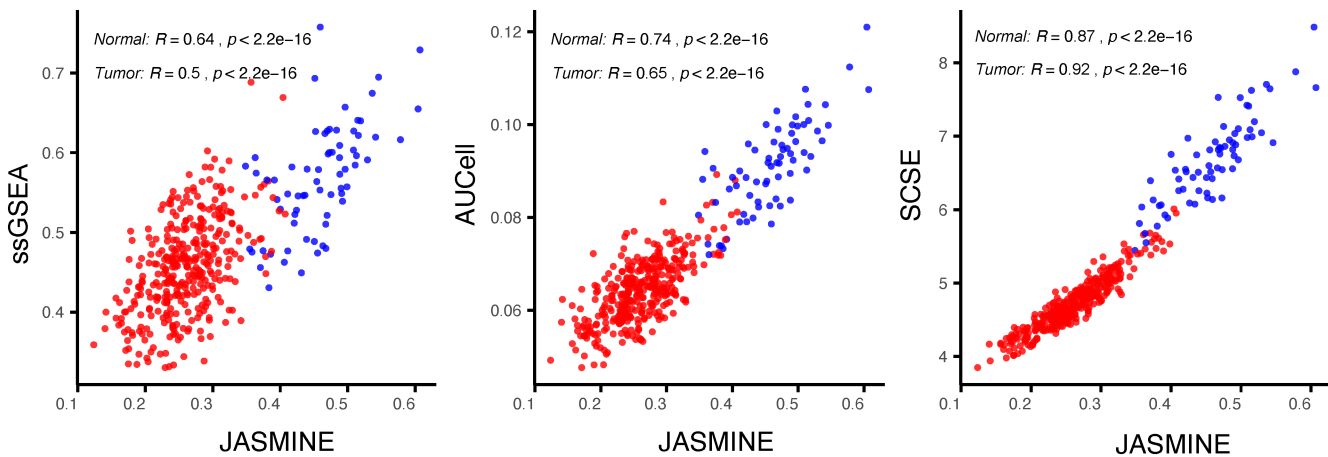

Supplement: supp [file elife-71994-supp-v1.zip]

# Figure 2-figure supplement 3

Cohen's d    ■ Up    ■ Down     No change

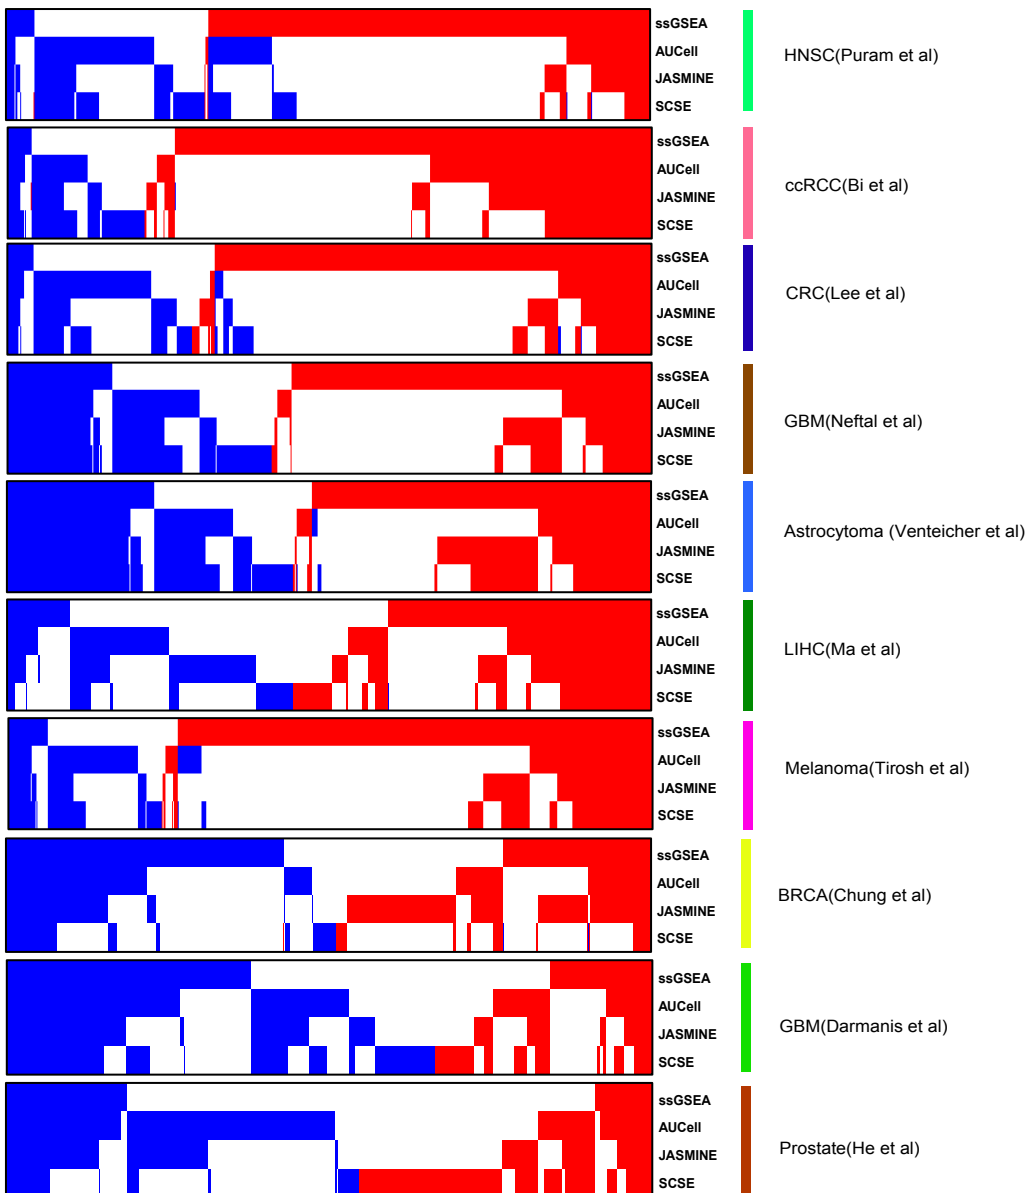

Supplement: supp [file elife-71994-supp-v1.zip]

Figure 2-figure supplement 5

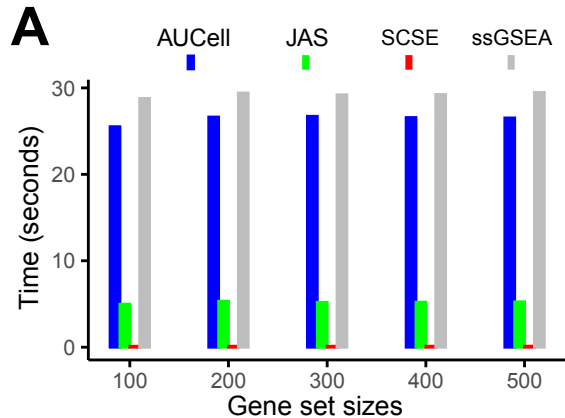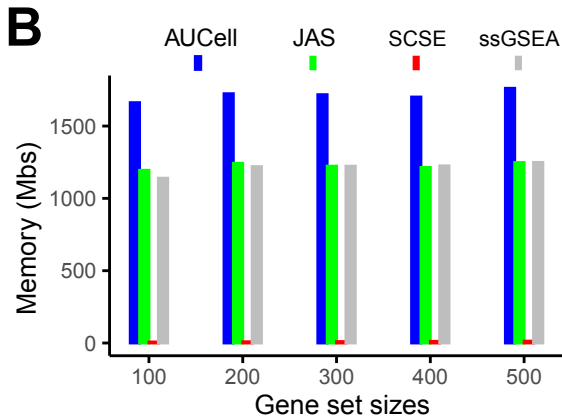

Supplement: supp [file elife-71994-supp-v1.zip]

Figure 1-figure supplement 3

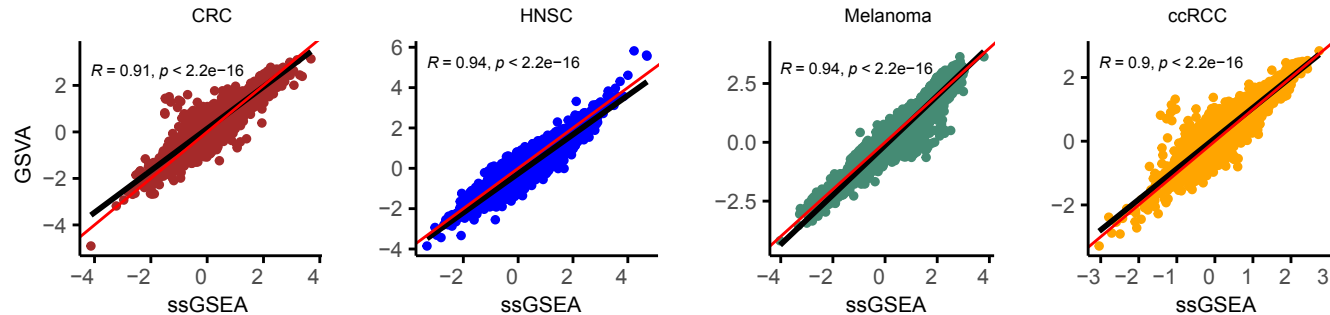

Supplement: supp [file elife-71994-supp-v1.zip]

Figure 2-figure supplement 4

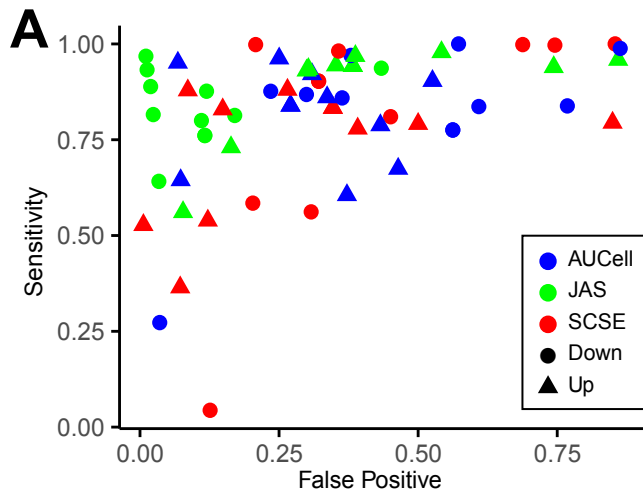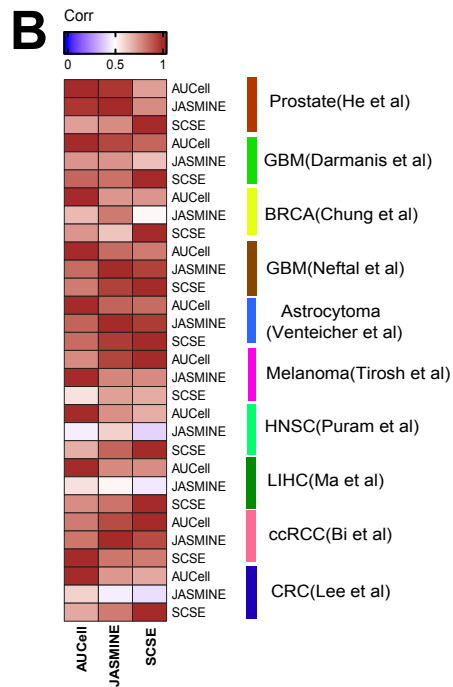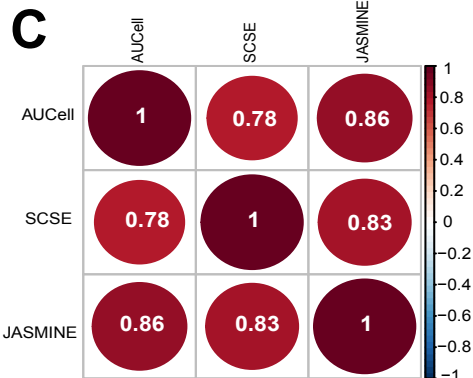

Supplement: supp [file elife-71994-supp-v1.zip]

# Figure 1-figure supplement 1

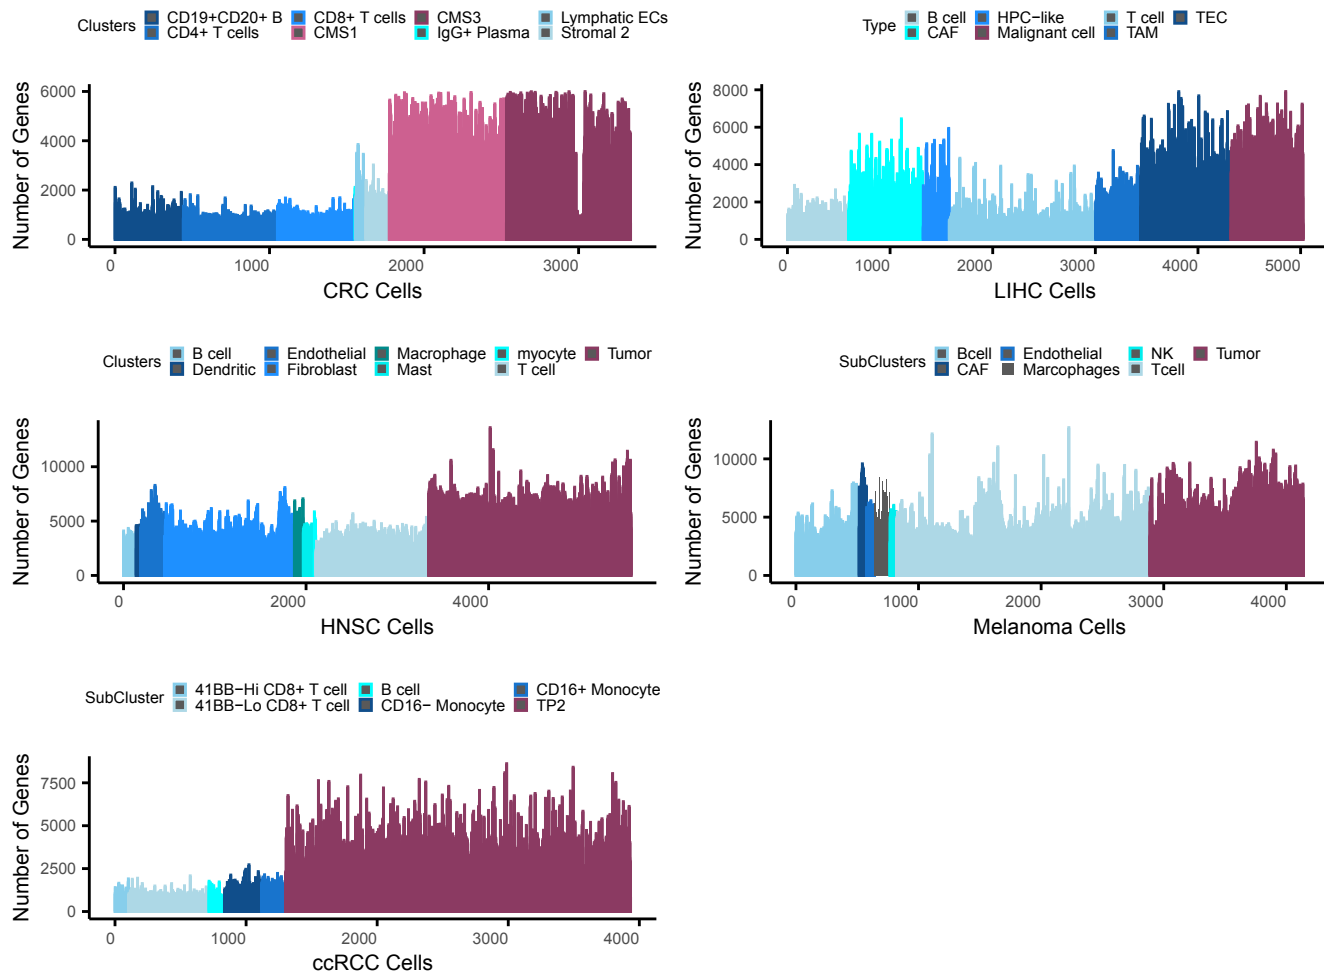

Supplement: supp [file elife-71994-supp-v1.zip]

Figure 2-figure supplement 2

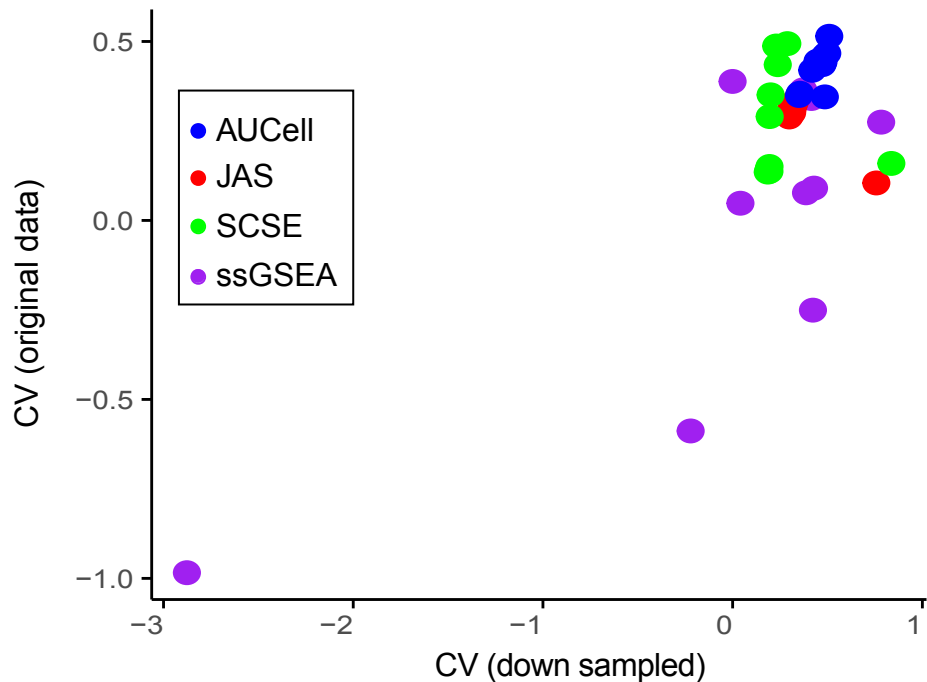

Supplement: supp [file elife-71994-supp-v1.zip]

# Figure 2-figure supplement 1

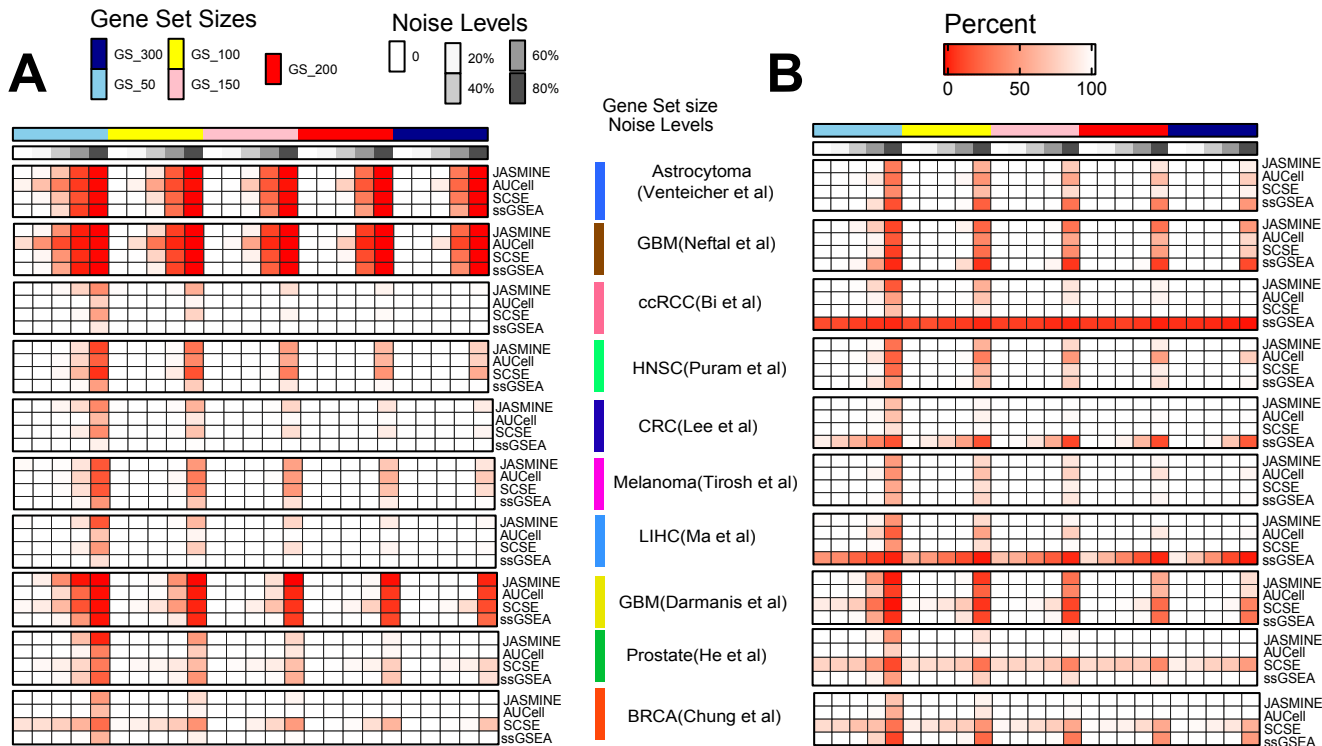

Supplement: supp [file elife-71994-supp-v1.zip]
